# Supplementary material for: A chiral cobalt(ii) complex catalyzed asymmetric formal [3+2] cycloaddition for the synthesis of 1,2,4-triazolines
Source: Royal Society of Chemistry journal article supplement (doi:10.1039/c7cc01278k), 2017-01-01
Supplement: c7cc01278k1.pdf [file c7cc01278k1.pdf]

**Chiral Cobalt(II) Complex Catalyzed Asymmetric Formal [3 + 2] Cycloaddition to  
Synthesize 1,2,4-Triazolines**

Baiwei Ma, Weiwei Luo, Lili Lin, Xiaohua Liu\* and Xiaoming Feng\*

†Key Laboratory of Green Chemistry & Technology, Ministry of Education, College of Chemistry,  
Sichuan University, Chengdu 610064, China.

E-mail: liuxh@scu.edu.cn

E-mail: xmfeng@scu.edu.cn

|                                                                      |       |
|----------------------------------------------------------------------|-------|
| (A) General information.....                                         | 2     |
| (B) Typical preparation procedure for 5-alkoxyoxazole compounds..... | 2     |
| (C) Typical procedure for asymmetric [3+2] reactions.....            | 2     |
| (D) Scaled-up version of the asymmetric reaction.....                | 2-3   |
| (E) X-ray crystallographic structure of the product <b>3ab</b> ..... | 3     |
| (F) Optimization of the reaction conditions.....                     | 3-7   |
| (G) Spectral characterization data for the products.....             | 7-25  |
| (H) Copies of NMR spectras for the products.....                     | 26-50 |
| (I) CD information of the products.....                              | 51-63 |
| (j) References.....                                                  | 63    |

### (A) General information

Reactions were carried out using commercial available reagents in oven-dried apparatus.  $\text{CH}_2\text{Cl}_2$  was dried over powdered  $\text{CaH}_2$  and distilled under nitrogen.  $^1\text{H}$  NMR spectra were recorded at 400 MHz. The chemical shifts were recorded in ppm relative to tetramethylsilane and with the solvent resonance as the internal standard. Data were reported as follows: chemical shift, multiplicity (s = singlet, d = doublet, t = triplet, m = multiplet), coupling constants (Hz), integration.  $^{13}\text{C}$  NMR data were collected at 100 MHz with complete proton decoupling. Chemical shifts were reported in ppm from the tetramethylsilane with the solvent resonance as internal standard. The preparation of 5-alkoxyoxazole compounds followed the literature.<sup>1</sup> Enantiomeric excesses were determined by HPLC analysis on Daicel Chiralcel IA, IB and IE in comparison with the authentic racemates. Optical rotations were reported as follows:  $[\alpha]_D^{25} = (c: \text{g}/100 \text{ mL}, \text{ in } \text{CH}_2\text{Cl}_2, \text{ D: } 589 \text{ nm})$ . HRMS was recorded on a commercial apparatus (ESI Source, TOF).

### (B) Typical preparation procedure for 5-alkoxyoxazole compounds<sup>1</sup>

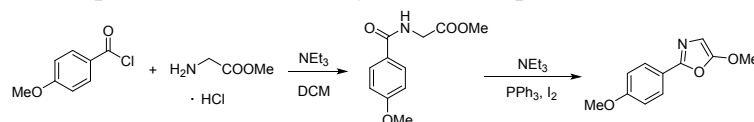

The synthesis of all the 5-alkoxyoxazole compounds was according to the following preparation procedure. Add dropwise a solution of anisoyl chloride (3.41 g, 20 mmol) in  $\text{CH}_2\text{Cl}_2$  (10 mL) to a suspension of glycine methyl ester hydrochloride (20 mmol) and triethylamine (4.83 mL, 44 mmol) in  $\text{CH}_2\text{Cl}_2$  (30 mL) at 0 °C. After the reaction mixture was stirred at room temperature for 30 minutes, it was washed with aq. HCl (2 M, 20 mL), saturated aq.  $\text{NaHCO}_3$  and saturated aq. NaCl, successively. Next the organic extract was dried (over  $\text{NaSO}_4$ ) and concentrated under reduced pressure. Then the pure amide was obtained after recrystallization.

To a mixture of  $\text{PPh}_3$  (2.62 g, 10 mmol) and  $\text{I}_2$  (2.54 g, 10 mmol) in  $\text{CH}_2\text{Cl}_2$  (25 mL) was added dropwise  $\text{Et}_3\text{N}$  (2.78 mL, 20 mmol) and stirred for 5–10 min. To this dark red solution was slowly added the amide (1.12 g, 5 mmol) in  $\text{CH}_2\text{Cl}_2$  (15 mL) and the solution was stirred for 24 h. After concentration of the dark solution in vacuo, the residue was purified via flash silica gel column chromatography to get the 5-alkoxyoxazole compound.

### (C) Typical procedure for asymmetric [3 + 2] reactions

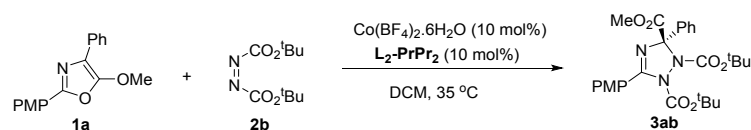

A dry reaction test tube was charged with  $\text{L}_2\text{-PrPr}_2$  (10 mol%),  $\text{Co}(\text{BF}_4)_2 \cdot 6\text{H}_2\text{O}$  (10 mol%), and  $\text{CH}_2\text{Cl}_2$  (1.0 mL), and the mixture was stirred at 35 °C for 0.5 h. Then, the 5-alkoxyoxazole **1a** (0.1 mmol) and the azodicarboxylate **2b** (0.12 mmol) were added. After being stirred at 35 °C for 24 h, the pure product was obtained by flash chromatography on silica gel (PE/EA = 5:1).

### (D) Scaled-up version of the asymmetric reaction

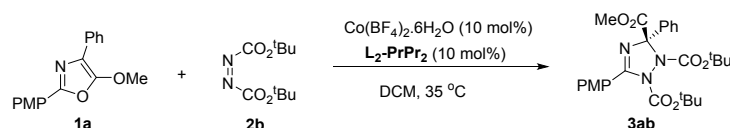

A dry reaction flask was charged with **L<sub>2</sub>-PrPr<sub>2</sub>** (10 mol%), Co(BF<sub>4</sub>)<sub>2</sub>·6H<sub>2</sub>O (10 mol%) and THF (5.0 mL). After stirring at 35 °C for 0.5 h, the solvent was evaporated in vacuo. Next, the 5-alkoxyoxazole **1a** (3.0 mmol) and the azodicarboxylate **2b** (3.6 mmol) were added to the reaction flask, following the addition of DCM (30 mL). After being stirred at 35 °C for 24 h, the solvent was removed and the pure product **3ab** was obtained by flash chromatography on silica gel (PE/EA = 5:1).

#### (E) X-ray crystallographic structure of the product **3ab**

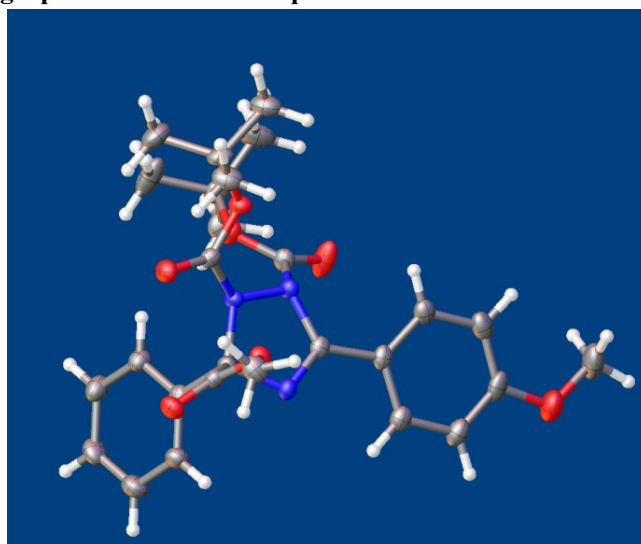

Single crystal of **3ab** [C<sub>27</sub>H<sub>33</sub>N<sub>3</sub>O<sub>7</sub>] was obtained from the mixed solvents of ethyl acetate and petroleum ether. CCDC 1531931 containing the supplementary crystallographic data can be obtained free of charge from The Cambridge Crystallographic Data Center via [www.ccdc.cam.ac.uk/data\\_request/cif](http://www.ccdc.cam.ac.uk/data_request/cif).

#### (F) Optimization of the reaction conditions

Table 1: Screening of the metal salts for the reaction of diethyl-diazene-1,2-dicarboxylate **2a**<sup>[a]</sup>

| Entry | Metal salt           | Yield (%) <sup>[b]</sup> | Ee (%) <sup>[c]</sup> |
|-------|----------------------|--------------------------|-----------------------|
| 1     | Cu(OTf) <sub>2</sub> | 60                       | 0                     |
| 2     | Mg(OTf) <sub>2</sub> | 99                       | 4                     |
| 3     | Zn(OTf) <sub>2</sub> | 93                       | 49                    |
| 4     | Sc(OTf) <sub>3</sub> | 77                       | 3                     |
| 5     | Ni(OTf) <sub>2</sub> | 99                       | 48                    |
| 6     | Yb(OTf) <sub>3</sub> | 88                       | 13                    |
| 7     | Bi(OTf) <sub>3</sub> | 71                       | 0                     |
| 8     | Ga(OTf) <sub>3</sub> | 87                       | 0                     |
| 9     | Y(OTf) <sub>3</sub>  | 90                       | 7                     |
| 10    | La(OTf) <sub>3</sub> | 85                       | 37                    |

|    |                                                      |    |    |
|----|------------------------------------------------------|----|----|
| 11 | Fe(OTf) <sub>3</sub>                                 | 71 | 0  |
| 12 | Zn(NTf <sub>2</sub> ) <sub>2</sub>                   | 97 | 35 |
| 13 | Ni(BF <sub>4</sub> ) <sub>2</sub> ·6H <sub>2</sub> O | 99 | 0  |
| 14 | Co(BF <sub>4</sub> ) <sub>2</sub> ·6H <sub>2</sub> O | 97 | 72 |

[a] Unless otherwise noted, the reaction was performed with metal salt (10 mol%), **L-PrPr<sub>2</sub>** (10 mol%) and **2a** (1.2 equiv) in CH<sub>2</sub>Cl<sub>2</sub> (1.0 mL) at 35 °C for 0.5 h, then **1a** (0.1 mmol) was added, the reaction mixture was stirred for 20 h. [b] Yield of the isolated product. [c] Determined by HPLC analysis on a chiral stationary phase (Chiralpak IB).

Table 2: Screening of the chiral ligands for the reaction of diethyl-diazene-1,2-dicarboxylate **2a** [a]

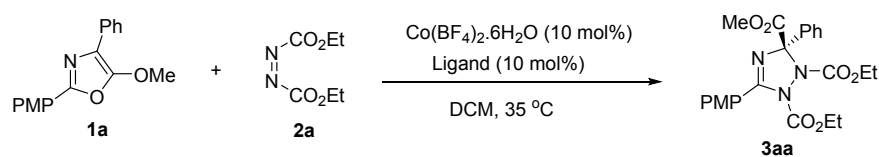

| Entry | Ligand                     | Yield (%) <sup>[b]</sup> | Ee (%) <sup>[c]</sup> |
|-------|----------------------------|--------------------------|-----------------------|
| 1     | <b>L-PiPr<sub>2</sub></b>  | 98                       | 64                    |
| 2     | <b>L-RaPr<sub>2</sub></b>  | 89                       | 65                    |
| 3     | <b>L-ProPh</b>             | 73                       | 69                    |
| 4     | <b>L-PrPr<sub>3</sub></b>  | 84                       | 70                    |
| 5     | <b>L-Pro<sup>t</sup>Bu</b> | 88                       | 76                    |
| 6     | <b>L-PrMe<sub>2</sub></b>  | 99                       | 0                     |
| 7     | <b>L-PrmMe<sub>2</sub></b> | 95                       | 4                     |
| 8     | <b>L-ProOMe</b>            | 52                       | 66                    |
| 9     | <b>L-PrEt<sub>2</sub></b>  | 98                       | 52                    |
| 10    | <b>L-PrPh</b>              | 83                       | 0                     |
| 11    | <b>L-PrpBr</b>             | 99                       | 0                     |

[a] Unless otherwise noted, the reaction was performed with Co(BF<sub>4</sub>)<sub>2</sub>·6H<sub>2</sub>O (10 mol%), the ligand (10 mol%) and **2a** (1.2 equiv) in CH<sub>2</sub>Cl<sub>2</sub> (1.0 mL) at 35 °C for 0.5 h, then **1a** (0.1 mmol) was added, the reaction mixture was stirred for 20 h. [b] Yield of the isolated product. [c] Determined by HPLC analysis on a chiral stationary phase (Chiralpak IB).

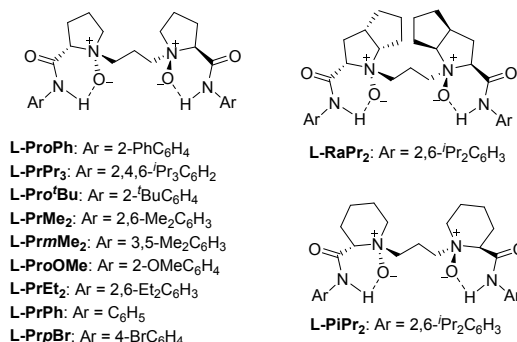

Table 3: Screening of the ligands for the reaction of diazene-1,2-dicarboxylate **2b** [a]

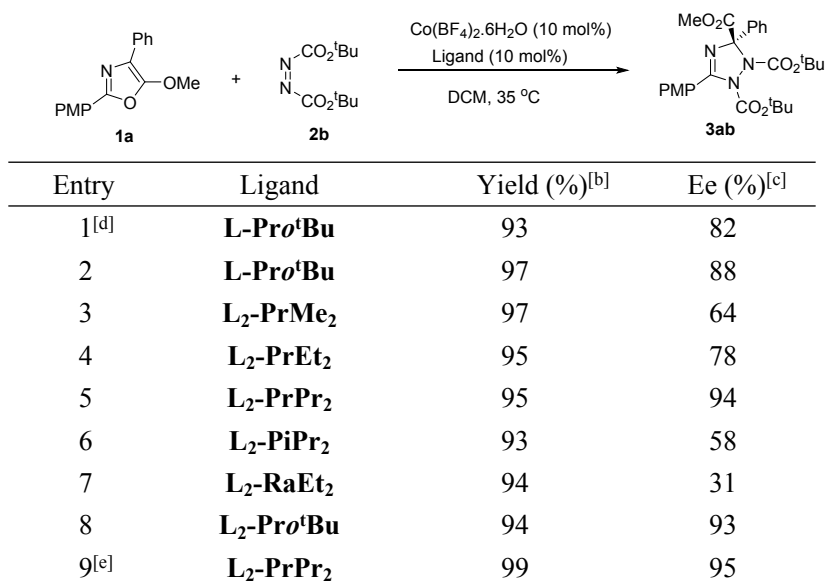

[a] Unless otherwise noted, the reaction was performed with Co(BF<sub>4</sub>)<sub>2</sub>·6H<sub>2</sub>O (10 mol%) and the ligand (10 mol%) in CH<sub>2</sub>Cl<sub>2</sub> (1.0 mL) at 35 °C for 0.5 h, then **1a** (0.1 mmol) and **2b** (1.2 equiv) was added, the reaction mixture was stirred for 20 h. [b] Yield of the isolated product. [c] Determined by HPLC analysis on a chiral stationary phase (Chiralpak IA). [d] The reaction was performed with Co(BF<sub>4</sub>)<sub>2</sub>·6H<sub>2</sub>O (10 mol%), **L-Pro<sup>t</sup>Bu** (10 mol%) and **2b** (1.2 equiv) in CH<sub>2</sub>Cl<sub>2</sub> (1.0 mL) at 35 °C for 0.5 h, then **1a** (0.1 mmol) was added, then stirring for 20 h. [e] The reaction was performed for 24 h.

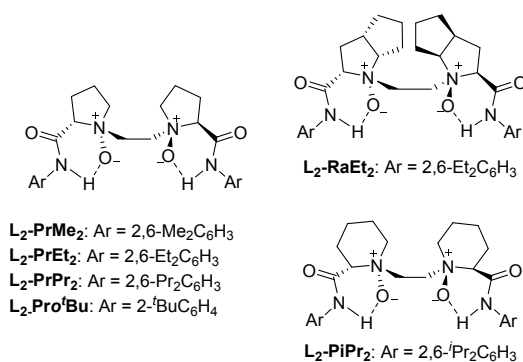

Table 4: Screening of the reaction solvent <sup>[a]</sup>

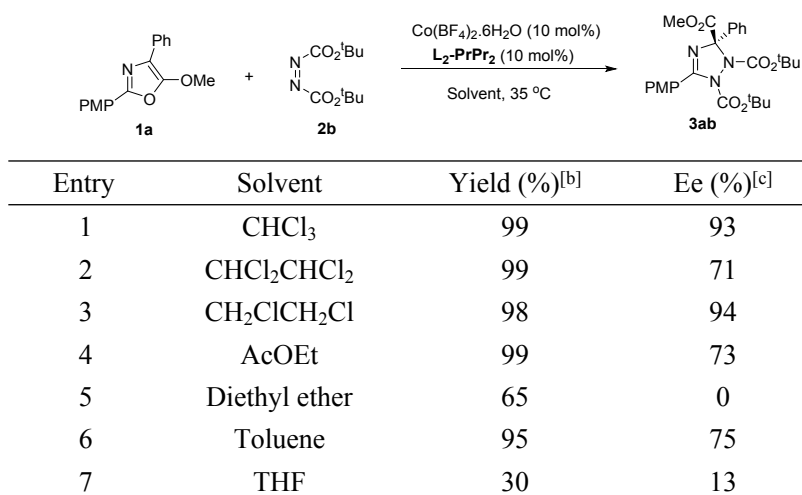

[a] Unless otherwise noted, the reaction was performed with **L<sub>2</sub>-PrPr<sub>2</sub>** (10 mol%) and Co(BF<sub>4</sub>)<sub>2</sub>·6H<sub>2</sub>O (10 mol%) in solvent (1.0 mL) at 35 °C for 0.5 h, then **1a** (0.1 mmol) and **2b** (1.2 equiv) was added, the reaction mixture was stirred for 24 h. [b] Yield of the isolated product. [c] Determined by HPLC analysis on a chiral stationary phase (Chiralpak IA).

Table 5: Screening of the ratio of **L<sub>2</sub>-PrPr<sub>2</sub>** and Co(BF<sub>4</sub>)<sub>2</sub>·6H<sub>2</sub>O [a]

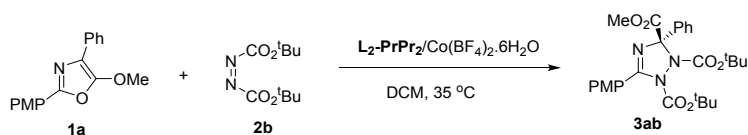

| Entry            | <b>L<sub>2</sub>-PrPr<sub>2</sub></b> : Co(BF <sub>4</sub> ) <sub>2</sub> ·6H <sub>2</sub> O | Yield (%) <sup>[b]</sup> | Ee (%) <sup>[c]</sup> |
|------------------|----------------------------------------------------------------------------------------------|--------------------------|-----------------------|
| 1                | 1:1                                                                                          | 99                       | 95                    |
| 2                | 1.1:1                                                                                        | 97                       | 93                    |
| 3                | 1.2:1                                                                                        | 99                       | 88                    |
| 4                | 1:1.1                                                                                        | 99                       | 92                    |
| 5 <sup>[d]</sup> | 1:1                                                                                          | 75                       | 91                    |

[a] Unless otherwise noted, the reaction was performed with 10 mol% of **L<sub>2</sub>-PrPr<sub>2</sub>**/Co(BF<sub>4</sub>)<sub>2</sub>·6H<sub>2</sub>O in CH<sub>2</sub>Cl<sub>2</sub> (1.0 mL) at 35 °C for 0.5 h, then **1a** (0.1 mmol) and **2b** (1.2 equiv) was added, the reaction mixture was stirred for 24 h. [b] Yield of the isolated product. [c] Determined by HPLC analysis on a chiral stationary phase (Chiralpak IA). [d] The reaction was performed with **L<sub>2</sub>-PrPr<sub>2</sub>** (5 mol%) and Co(BF<sub>4</sub>)<sub>2</sub>·6H<sub>2</sub>O (5 mol%).

Table 6: Screening of the ratio of **1a/2b** [a]

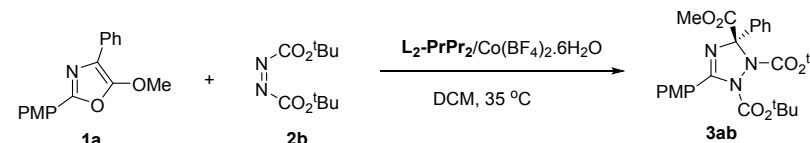

| Entry | <b>1a/2b</b> | Yield (%) <sup>[b]</sup> | Ee (%) <sup>[c]</sup> |
|-------|--------------|--------------------------|-----------------------|
| 1     | 1:1.2        | 99                       | 95                    |
| 2     | 1:1.1        | 97                       | 93                    |
| 3     | 1:1          | 92                       | 92                    |
| 4     | 1.2:1        | 99                       | 92                    |

[a] Unless otherwise noted, the reaction was performed with 10 mol% of **L<sub>2</sub>-PrPr<sub>2</sub>**/Co(BF<sub>4</sub>)<sub>2</sub>·6H<sub>2</sub>O in CH<sub>2</sub>Cl<sub>2</sub> (1.0 mL) at 35 °C for 0.5 h, then **1a** and **2b** was added, the reaction mixture was stirred for 24 h. [b] Yield of the isolated product. [c] Determined by HPLC analysis on a chiral stationary phase (Chiralpak IA).

Table 7: Screening of the counterion of the metal salt and additive [a]

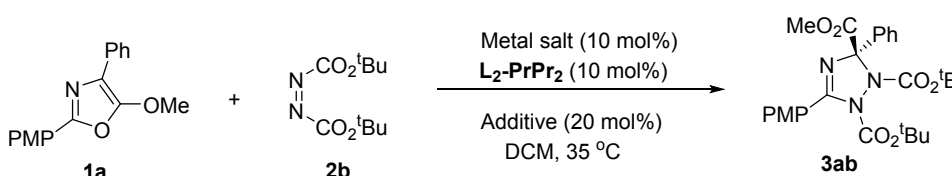

| Entry | Metal salt                                            | Additive                        | Yield (%) <sup>[b]</sup> | Ee (%) <sup>[c]</sup> |
|-------|-------------------------------------------------------|---------------------------------|--------------------------|-----------------------|
| 1     | Co(ClO <sub>4</sub> ) <sub>2</sub> ·6H <sub>2</sub> O |                                 | 93                       | 90                    |
| 2     | Co(acac) <sub>2</sub>                                 |                                 | 86                       | 0                     |
| 3     | CoBr <sub>2</sub>                                     |                                 | 90                       | 21                    |
| 4     | Co(BF <sub>4</sub> ) <sub>2</sub> ·6H <sub>2</sub> O  | NaBAR <sub>4</sub> <sup>F</sup> | 39                       | 60                    |
| 5     | Co(BF <sub>4</sub> ) <sub>2</sub> ·6H <sub>2</sub> O  | LiNTf <sub>2</sub>              | 87                       | 83                    |

[a] Unless otherwise noted, the reaction was performed with **L<sub>2</sub>-PrPr<sub>2</sub>** (10 mol%), metal salt (10 mol%) and the additive (20 mol%) in CH<sub>2</sub>Cl<sub>2</sub> (1.0 mL) at 35 °C for 0.5 h, then **1a** (0.1 mmol) and **2b** (1.2 equiv) was added, the reaction mixture was stirred for 24 h. [b] Yield of the isolated product. [c] Determined by HPLC analysis on a chiral stationary phase (Chiralpak IA).

Table 8: The effect of the ester group of azodicarboxylates on the reaction <sup>[a]</sup>

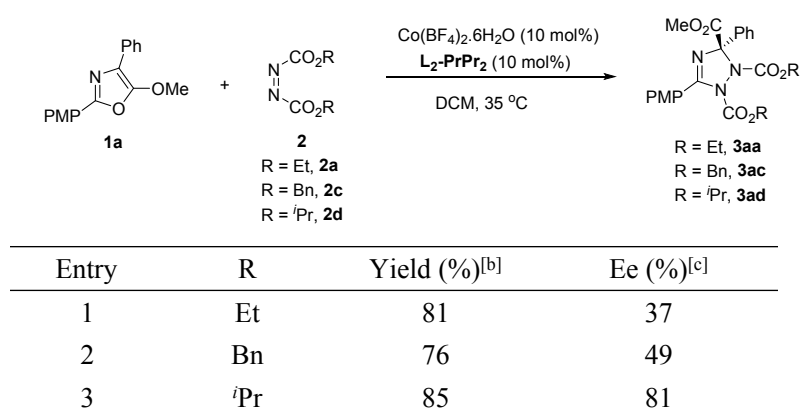

[a] Unless otherwise noted, the reaction was performed with **L<sub>2</sub>-PrPr<sub>2</sub>** (10 mol%), Co(BF<sub>4</sub>)<sub>2</sub>·6H<sub>2</sub>O (10 mol%) in CH<sub>2</sub>Cl<sub>2</sub> (1.0 mL) at 35 °C for 0.5 h, then **1a** (0.1 mmol) and **2** (1.2 equiv) was added, the reaction mixture was stirred for 24 h. [b] Yield of the isolated product. [c] Determined by HPLC analysis on a chiral stationary phase (Chiralpak IB).

### (G) Spectral characterization data for the products

1,2-di-tert-butyl 3-methyl (R)-5-(4-methoxyphenyl)-3-phenyl-1H-1,2,4-triazole-1,2,3(3H)-tricarboxylate (**3ab**)

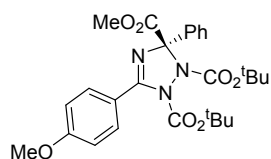

White solid; 99% yield, 95% ee;  $[\alpha]^{14.0}_D = +69.8$  (c 1.01, CH<sub>2</sub>Cl<sub>2</sub>); the ee was determined by HPLC analysis using a chiral IA column (*i*PrOH/hexane = 10/90, 1.0 mL/min,  $\lambda = 254$  nm), *t* (major) = 5.51 min, *t* (minor) = 6.34 min; <sup>1</sup>H NMR (400 MHz, CDCl<sub>3</sub>)  $\delta$  7.86 – 7.82 (m, 2H), 7.70 – 7.68 (m, 2H), 7.42 – 7.33 (m, 3H), 6.94 – 6.91 (m, 2H), 3.84 (s, 3H), 3.74 (s, 3H), 1.54 (s, 9H), 1.31 (s, 9H); <sup>13</sup>C NMR (100 MHz, CDCl<sub>3</sub>)  $\delta$  168.4, 162.4, 158.8, 153.2, 151.2, 137.8, 132.0, 128.5, 127.8, 127.3, 121.1, 113.2, 93.0, 84.0, 82.7, 55.4, 53.2, 28.1, 27.7; HRMS (ESI-TOF): Calcd for C<sub>27</sub>H<sub>33</sub>N<sub>3</sub>O<sub>7</sub>Na<sup>+</sup>[M+Na]<sup>+</sup> 534.2216, Found 534.2224.

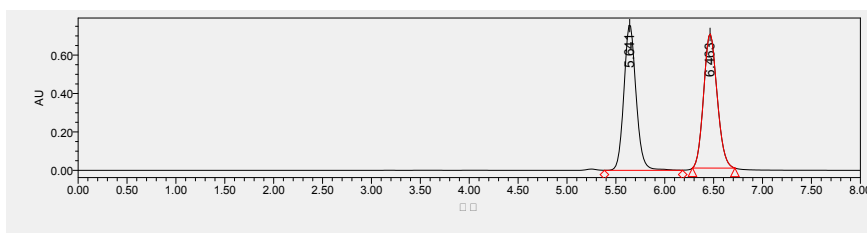

| Entry | Retention Time | Area    | % Area |
|-------|----------------|---------|--------|
| 1     | 5.641          | 6583150 | 49.53  |
| 2     | 6.463          | 6707466 | 50.47  |

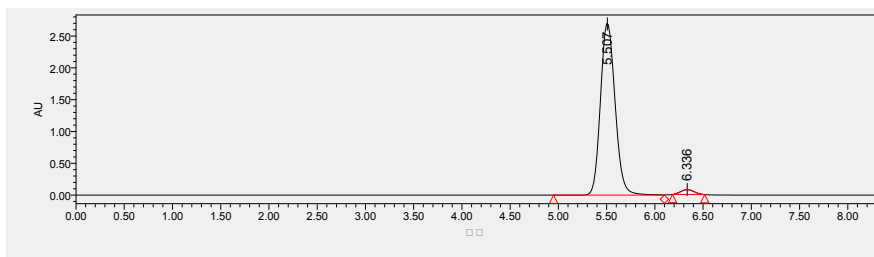

| Entry | Retention Time | Area     | % Area |
|-------|----------------|----------|--------|
| 1     | 5.507          | 28433975 | 97.43  |
| 2     | 6.336          | 750078   | 2.57   |

1,2-di-tert-butyl 3-methyl (R)-5-(3-methoxyphenyl)-3-phenyl-1H-1,2,4-triazole-1,2,3(3H)-tricarboxylate (**3bb**)

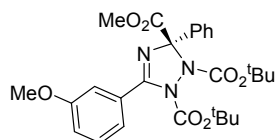

Colorless oil; 99% yield, 96% ee;  $[\alpha]^{14.0}_D = +37.1$  (c 1.01,  $\text{CH}_2\text{Cl}_2$ ); the ee was determined by HPLC analysis using a chiral IA column (*i*PrOH/hexane = 10/90, 1.0 mL/min,  $\lambda = 254$  nm),  $t$  (major) = 4.52 min,  $t$  (minor) = 5.27 min;  $^1\text{H}$  NMR (400 MHz,  $\text{CDCl}_3$ )  $\delta$  7.72 – 7.69 (m, 2H), 7.46 – 7.41 (m, 3H), 7.39 – 7.35 (m, 2H), 7.33 (t,  $J = 7.9$  Hz, 1H), 7.05 – 7.02 (m, 1H), 3.84 (s, 3H), 3.75 (s, 3H), 1.54 (s, 9H), 1.28 (s, 9H);  $^{13}\text{C}$  NMR (100 MHz,  $\text{CDCl}_3$ )  $\delta$  168.2, 159.1, 159.0, 153.3, 150.9, 137.5, 130.2, 128.9, 128.5, 127.9, 127.3, 122.6, 117.8, 114.7, 93.4, 84.1, 82.9, 55.4, 53.2, 28.1, 27.6; HRMS (ESI-TOF): Calcd for  $\text{C}_{27}\text{H}_{33}\text{N}_3\text{O}_7\text{Na}^+[\text{M}+\text{Na}]^+$  534.2216, Found 534.2223.

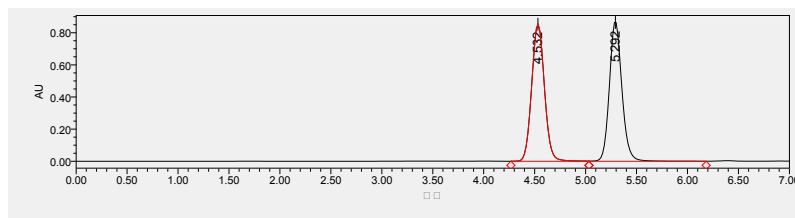

| Entry | Retention Time | Area    | % Area |
|-------|----------------|---------|--------|
| 1     | 4.532          | 7430721 | 50.03  |
| 2     | 5.292          | 7422575 | 49.97  |



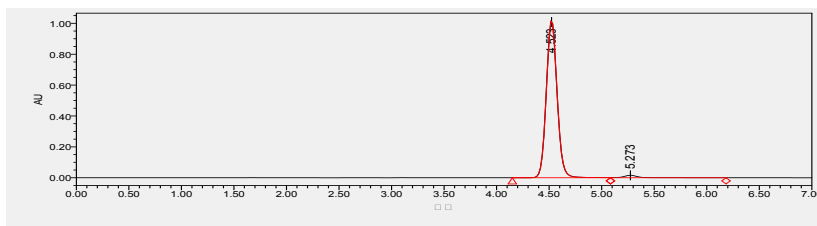

| Entry | Retention Time | Area    | % Area |
|-------|----------------|---------|--------|
| 1     | 4.523          | 7294032 | 97.98  |
| 2     | 5.273          | 150456  | 2.02   |

1,2-di-tert-butyl 3-methyl (R)-5-(4-ethoxyphenyl)-3-phenyl-1H-1,2,4-triazole-1,2,3(3H)-tricarboxylate (**3cb**)

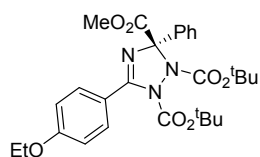

Colorless oil; 99% yield, 94% ee;  $[\alpha]^{14.1}_D = +75.2$  (c 1.02,  $\text{CH}_2\text{Cl}_2$ ); the ee was determined by HPLC analysis using a chiral IA column (*i*PrOH/hexane = 10/90, 1.0 mL/min,  $\lambda = 254$  nm), *t* (major) = 5.86 min, *t* (minor) = 7.06 min;  $^1\text{H}$  NMR (400 MHz,  $\text{CDCl}_3$ )  $\delta$  7.84 – 7.81 (m, 2H), 7.71 – 7.68 (m, 2H), 7.42 – 7.33 (m, 3H), 6.92 – 6.89 (m, 2H), 4.08 (t,  $J = 7.0$  Hz, 2H), 3.74 (s, 3H), 1.54 (s, 9H), 1.42 (t,  $J = 7.2$  Hz, 3H), 1.31 (s, 9H);  $^{13}\text{C}$  NMR (100 MHz,  $\text{CDCl}_3$ )  $\delta$  168.4, 161.9, 158.8, 153.2, 151.2, 137.8, 132.0, 128.4, 127.8, 127.3, 120.9, 113.7, 92.9, 84.0, 82.7, 63.6, 53.2, 28.1, 27.7, 14.7; HRMS (ESI-TOF): Calcd for  $\text{C}_{28}\text{H}_{35}\text{N}_3\text{O}_7\text{Na}^+[\text{M}+\text{Na}]^+$  548.2373, Found 548.2366.

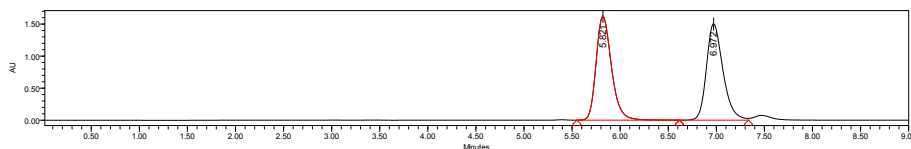

| Entry | Retention Time | Area     | % Area |
|-------|----------------|----------|--------|
| 1     | 5.821          | 18027125 | 50.06  |
| 2     | 6.972          | 17983264 | 49.94  |

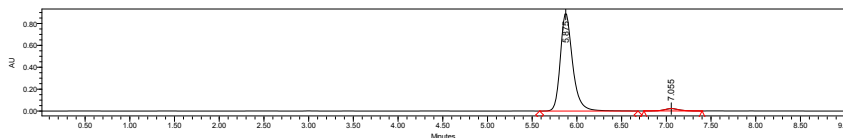

| Entry | Retention Time | Area    | % Area |
|-------|----------------|---------|--------|
| 1     | 5.875          | 8518274 | 97.21  |
| 2     | 7.055          | 244505  | 2.79   |

1,2-di-tert-butyl 3-methyl (R)-5-(4-(tert-butyl)phenyl)-3-phenyl-1H-1,2,4-triazole-1,2,3(3H)-tricarboxylate (**3db**)

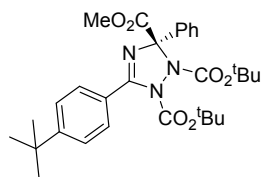

Colorless oil; 99% yield, 97% ee;  $[\alpha]^{14.1}_D = +55.7$  (c 1.14,  $\text{CH}_2\text{Cl}_2$ ); the ee was determined by HPLC analysis using a chiral IA column (*i*PrOH/hexane = 10/90, 1.0 mL/min,  $\lambda = 254$  nm),  $t$  (major) = 3.93 min,  $t$  (minor) = 4.79 min;  $^1\text{H}$  NMR (400 MHz,  $\text{CDCl}_3$ )  $\delta$  7.82 – 7.79 (m, 2H), 7.72 – 7.70 (m, 2H), 7.45 – 7.42 (m, 2H), 7.41 – 7.39 (m, 2H), 7.38 – 7.33 (m, 1H), 3.74 (s, 3H), 1.54 (s, 9H), 1.33 (s, 9H), 1.28 (s, 9H);  $^{13}\text{C}$  NMR (100 MHz,  $\text{CDCl}_3$ )  $\delta$  168.3, 159.1, 155.2, 153.3, 151.1, 137.7, 129.8, 128.5, 127.9, 127.3, 126.1, 124.8, 93.1, 84.0, 82.8, 53.2, 35.0, 31.1, 28.1, 27.6; HRMS (ESI-TOF): Calcd for  $\text{C}_{30}\text{H}_{40}\text{N}_3\text{O}_6[\text{M}+\text{H}]^+$  538.2917, Found 538.2920.

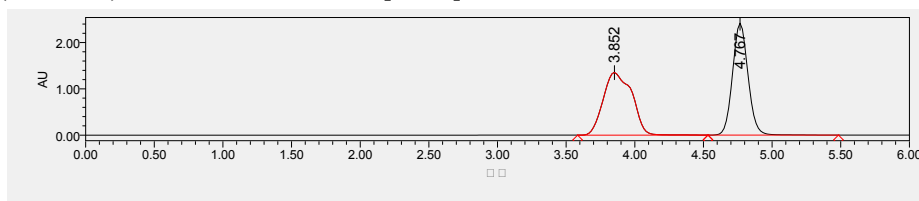

| Entry | Retention Time | Area     | % Area |
|-------|----------------|----------|--------|
| 1     | 3.852          | 19626316 | 50.81  |
| 2     | 4.767          | 19001762 | 49.19  |

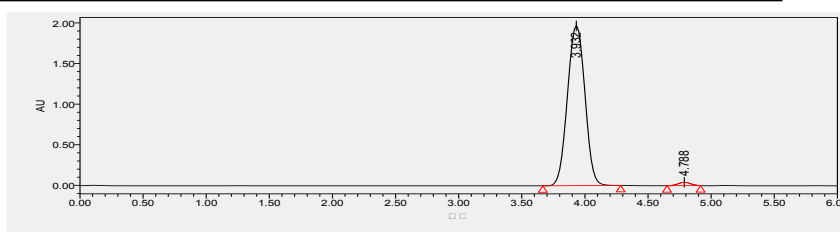

| Entry | Retention Time | Area     | % Area |
|-------|----------------|----------|--------|
| 1     | 3.932          | 18939234 | 98.51  |
| 2     | 4.788          | 287342   | 1.49   |

1,2-di-tert-butyl 3-methyl (R)-5-(3,5-dimethylphenyl)-3-phenyl-1H-1,2,4-triazole-1,2,3(H)-tricarboxylate (**3eb**)

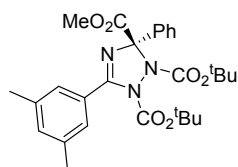

Colorless oil; 99% yield, 98% ee;  $[\alpha]^{14.1}_D = +22.6$  (c 0.99,  $\text{CH}_2\text{Cl}_2$ ); the ee was determined by HPLC analysis using a chiral IE column (*i*PrOH/hexane = 20/80, 1.0 mL/min,  $\lambda = 254$  nm),  $t$  (major) = 9.38 min,  $t$  (minor) = 8.80 min;  $^1\text{H}$  NMR (400 MHz,  $\text{CDCl}_3$ )  $\delta$  7.72 – 7.70 (m, 2H), 7.46 (s, 2H), 7.44 – 7.39 (m, 2H), 7.38 – 7.34 (m, 2H), 7.12 (s, 1H), 3.74 (s, 3H), 2.35 (s, 6H), 1.54 (s, 9H), 1.27 (s, 9H);  $^{13}\text{C}$  NMR (100 MHz,  $\text{CDCl}_3$ )  $\delta$  168.3, 159.6, 153.2, 150.9, 137.6, 137.4, 133.4,

128.7, 128.5, 127.9, 127.6, 127.3, 93.3, 84.0, 82.9, 53.2, 28.1, 27.6, 25.3, 21.1; HRMS (ESI-TOF): Calcd for  $C_{28}H_{35}N_3O_6Na^+[M+Na]^+$  532.2424, Found 532.2426.

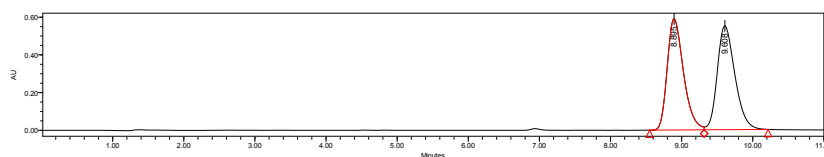

| Entry | Retention Time | Area    | % Area |
|-------|----------------|---------|--------|
| 1     | 8.895          | 9358900 | 49.63  |
| 2     | 9.608          | 9496835 | 50.37  |

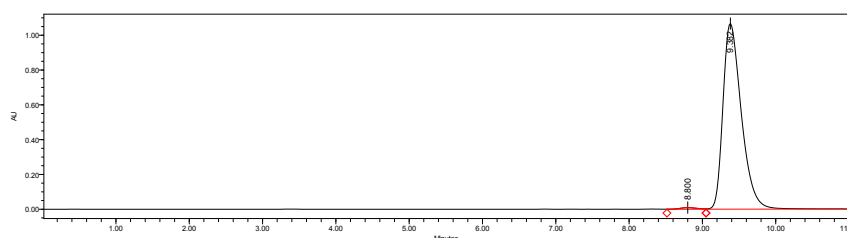

| Entry | Retention Time | Area     | % Area |
|-------|----------------|----------|--------|
| 1     | 8.800          | 143620   | 0.77   |
| 2     | 9.382          | 18605806 | 99.23  |

1,2-di-tert-butyl 3-methyl (R)-5-(4-bromophenyl)-3-phenyl-1H-1,2,4-triazole-1,2,3(3H)-tricarboxylate (**3fb**)

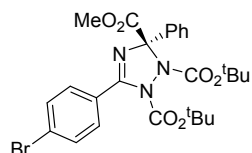

Colorless oil; 95% yield, 92% ee;  $[\alpha]^{14.2}_D = +49.5$  (c 0.89,  $CH_2Cl_2$ ); the ee was determined by HPLC analysis using a chiral IA column (*i*PrOH/hexane = 10/90, 1.0 mL/min,  $\lambda = 254$  nm),  $t$  (major) = 5.11 min,  $t$  (minor) = 6.72 min;  $^1H$  NMR (400 MHz,  $CDCl_3$ )  $\delta$  7.76 – 7.72 (m, 2H), 7.70 – 7.67 (m, 2H), 7.58 – 7.54 (m, 2H), 7.44 – 7.35 (m, 3H), 3.75 (s, 3H), 1.54 (s, 9H), 1.31 (s, 9H);  $^{13}C$  NMR (100 MHz,  $CDCl_3$ )  $\delta$  168.1, 158.4, 153.2, 151.0, 137.3, 131.5, 131.1, 128.6, 127.9, 127.8, 127.2, 126.5, 93.5, 84.5, 83.0, 53.3, 28.1, 27.7; HRMS (ESI-TOF): Calcd for  $C_{26}H_{30}^{78.9183}BrN_3O_6Na^+[M+Na]^+$  582.1216, Found 582.1222; Calcd for  $C_{26}H_{30}^{80.9163}BrN_3O_6Na^+[M+Na]^+$  584.1195, Found 584.1208.

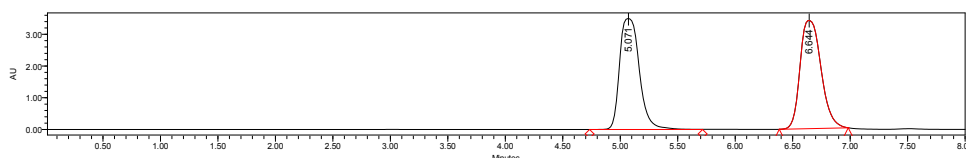

| Entry | Retention Time | Area     | % Area |
|-------|----------------|----------|--------|
| 1     | 5.071          | 41755135 | 49.20  |
| 2     | 6.644          | 43113273 | 50.80  |

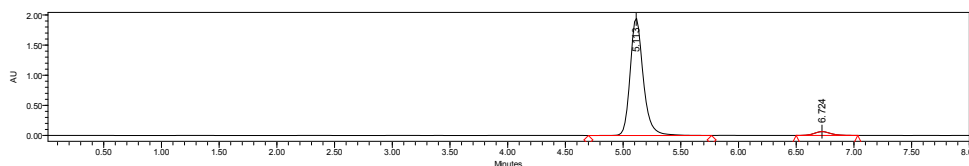

| Entry | Retention Time | Area     | % Area |
|-------|----------------|----------|--------|
| 1     | 5.113          | 15340963 | 96.08  |
| 2     | 6.724          | 625833   | 3.92   |

1,2-di-tert-butyl 3-methyl (R)-5-(4-fluorophenyl)-3-phenyl-1H-1,2,4-triazole-1,2,3(3H)-tricarboxylate (**3gb**)

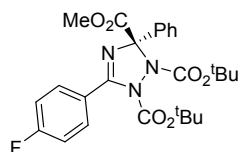

Colorless oil; 94% yield, 92% ee;  $[\alpha]^{14.2}_D = +31.9$  (c 0.94,  $\text{CH}_2\text{Cl}_2$ ); the ee was determined by HPLC analysis using a chiral IA column (*i*PrOH/hexane = 10/90, 1.0 mL/min,  $\lambda = 254$  nm),  $t$  (major) = 4.50 min,  $t$  (minor) = 5.37 min;  $^1\text{H}$  NMR (400 MHz,  $\text{CDCl}_3$ )  $\delta$  7.90 – 7.87 (m, 2H), 7.70 – 7.68 (m, 2H), 7.44 – 7.35 (m, 3H), 7.13 – 7.08 (m, 2H), 3.75 (s, 3H), 1.54 (s, 9H), 1.30 (s, 9H);  $^{13}\text{C}$  NMR (100 MHz,  $\text{CDCl}_3$ )  $\delta$  168.2, 164.8 (d,  $J = 251.2$  Hz), 163.6, 158.2, 153.2, 151.0, 137.5, 132.4 (d,  $J = 8.9$  Hz), 132.3, 128.6, 127.9, 127.2, 125.0 (d,  $J = 3.2$  Hz), 115.1 (d,  $J = 22.0$  Hz), 114.9, 93.3, 84.4, 83.0, 53.3, 28.1, 27.6; HRMS (ESI-TOF): Calcd for  $\text{C}_{26}\text{H}_{30}\text{FN}_3\text{O}_6\text{Na}^+[\text{M}+\text{Na}]^+$  522.2016, Found 522.2013.

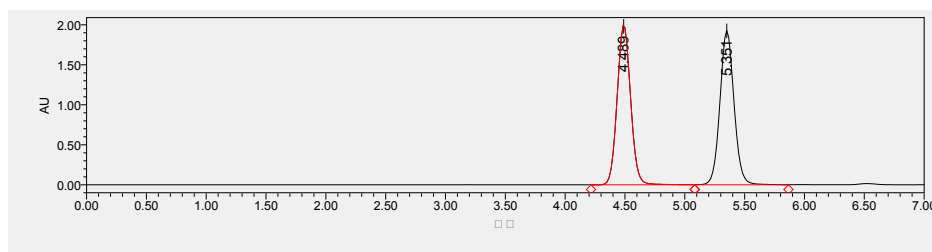

| Entry | Retention Time | Area     | % Area |
|-------|----------------|----------|--------|
| 1     | 4.489          | 15608607 | 49.75  |
| 2     | 5.351          | 15766048 | 50.25  |

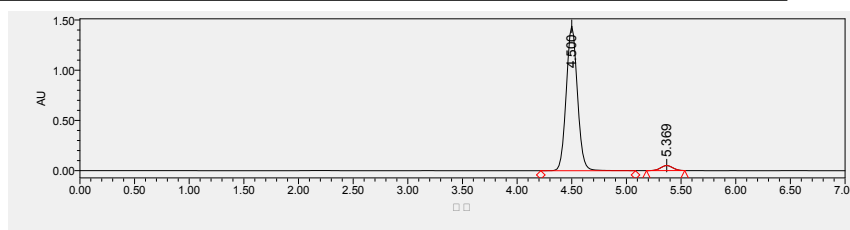

| Entry | Retention Time | Area     | % Area |
|-------|----------------|----------|--------|
| 1     | 4.500          | 10199405 | 96.36  |
| 2     | 5.369          | 384747   | 3.64   |

1,2-di-tert-butyl 3-methyl (R)-3,5-diphenyl-1H-1,2,4-triazole-1,2,3(3H)-tricarboxylate (**3hb**)

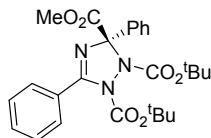

Colorless oil; 99% yield, 95% ee;  $[\alpha]^{14.2}_D = +35.5$  (c 0.95,  $\text{CH}_2\text{Cl}_2$ ); the ee was determined by HPLC analysis using a chiral IA column (*i*PrOH/hexane = 10/90, 1.0 mL/min,  $\lambda = 254$  nm),  $t$  (major) = 4.46 min,  $t$  (minor) = 5.04 min;  $^1\text{H}$  NMR (400 MHz,  $\text{CDCl}_3$ )  $\delta$  7.87 – 7.85 (m, 2H), 7.73 – 7.70 (m, 2H), 7.52 – 7.47 (m, 1H), 7.44 – 7.41 (m, 4H), 7.40 – 7.34 (m, 1H), 3.75 (s, 3H), 1.55 (s, 9H), 1.27 (s, 9H);  $^{13}\text{C}$  NMR (100 MHz,  $\text{CDCl}_3$ )  $\delta$  168.3, 159.2, 153.3, 150.9, 137.6, 131.6, 130.0, 129.0, 128.5, 127.9, 127.8, 127.3, 93.4, 84.2, 82.9, 53.2, 28.1, 27.6; HRMS (ESI-TOF): Calcd for  $\text{C}_{26}\text{H}_{31}\text{N}_3\text{O}_6\text{Na}^+[\text{M}+\text{Na}]^+$  504.2111, Found 504.2122.

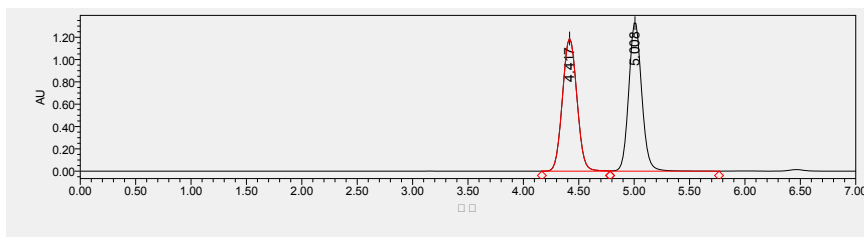

| Entry | Retention Time | Area     | % Area |
|-------|----------------|----------|--------|
| 1     | 4.417          | 10803594 | 49.92  |
| 2     | 5.008          | 10839419 | 50.08  |

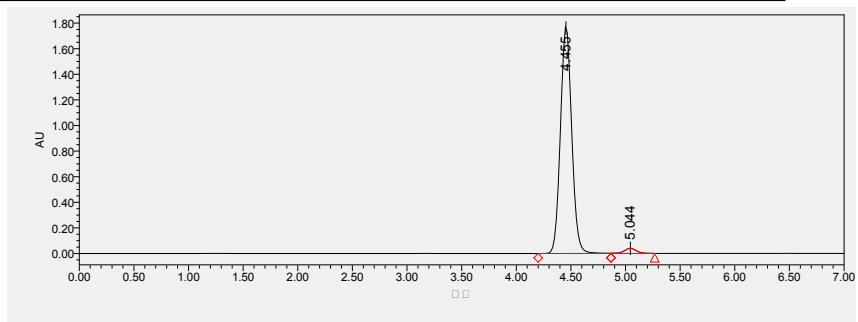

| Entry | Retention Time | Area     | % Area |
|-------|----------------|----------|--------|
| 1     | 4.455          | 12719216 | 97.65  |
| 2     | 5.044          | 305669   | 2.35   |

1,2-di-tert-butyl 3-methyl (R)-5-(naphthalen-2-yl)-3-phenyl-1H-1,2,4-triazole-1,2,3(3H)-tricarboxylate (**3ib**)

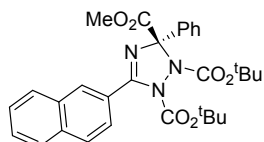

Colorless oil; 94% yield, 95% ee;  $[\alpha]^{14.1}_D = +55.0$  (c 0.99,  $\text{CH}_2\text{Cl}_2$ ); the ee was determined by HPLC analysis using a chiral IA column (*i*PrOH/hexane = 10/90, 1.0 mL/min,  $\lambda = 254$  nm),  $t$  (major) = 5.03 min,  $t$  (minor) = 5.49 min;  $^1\text{H}$  NMR (400 MHz,  $\text{CDCl}_3$ )  $\delta$  8.41 (s, 1H), 7.94 – 7.91 (m, 2H), 7.88 – 7.84 (m, 2H), 7.78 – 7.76 (m, 2H), 7.57 – 7.49 (m, 2H), 7.47 – 7.43 (m, 2H), 7.41 – 7.37 (m, 1H), 3.76 (s, 3H), 1.57 (s, 9H), 1.26 (s, 9H);  $^{13}\text{C}$  NMR (100 MHz,  $\text{CDCl}_3$ )  $\delta$  168.3, 159.3, 153.3, 151.0, 137.6, 134.8, 132.3, 130.8, 128.9, 128.6, 128.0, 127.8, 127.4, 127.3, 126.6,

126.3, 126.2, 93.4, 84.3, 83.0, 53.3, 28.1, 27.6; HRMS (ESI-TOF): Calcd for  $C_{30}H_{33}N_3O_6Na^+[M+Na]^+$  554.2267, Found 554.2263.

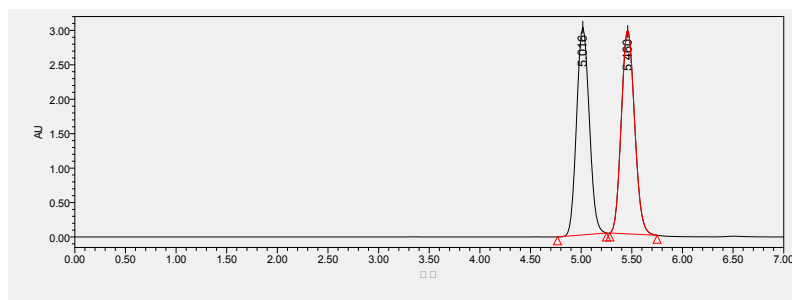

| Entry | Retention Time | Area     | % Area |
|-------|----------------|----------|--------|
| 1     | 5.016          | 26196083 | 49.31  |
| 2     | 5.460          | 26932346 | 50.69  |

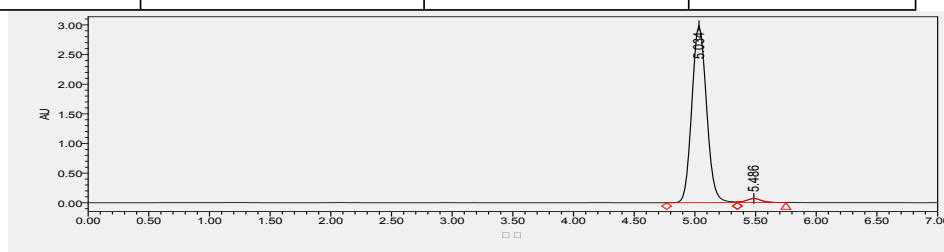

| Entry | Retention Time | Area     | % Area |
|-------|----------------|----------|--------|
| 1     | 5.034          | 25183538 | 97.66  |
| 2     | 5.486          | 603807   | 2.34   |

1,2-di-tert-butyl 3-methyl (R)-5-(furan-2-yl)-3-phenyl-1H-1,2,4-triazole-1,2,3(3H)-tricarboxylate (**3jb**)

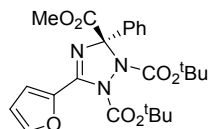

Colorless oil; 83% yield, 91% ee;  $[\alpha]^{14.1}_D = +67.3$  (c 0.78,  $CH_2Cl_2$ ); the ee was determined by HPLC analysis using a chiral IA column (*i*PrOH/hexane = 10/90, 1.0 mL/min,  $\lambda = 254$  nm), *t* (major) = 5.10 min, *t* (minor) = 6.90 min;  $^1H$  NMR (400 MHz,  $CDCl_3$ )  $\delta$  7.69 – 7.65 (m, 2H), 7.60 (dd, *J* = 1.6, 0.8 Hz, 1H), 7.40 – 7.31 (m, 3H), 7.26 – 7.24 (m, 1H), 6.54 (dd, *J* = 3.6, 1.6 Hz, 1H), 3.74 (s, 3H), 1.52 (s, 9H), 1.39 (s, 9H);  $^{13}C$  NMR (100 MHz,  $CDCl_3$ )  $\delta$  167.9, 153.0, 150.9, 149.4, 145.9, 142.7, 137.2, 128.6, 127.9, 127.3, 119.6, 111.8, 93.0, 84.4, 83.0, 53.2, 28.1, 27.7; HRMS (ESI-TOF): Calcd for  $C_{24}H_{29}N_3O_7Na^+[M+Na]^+$  494.1903, Found 494.1907.

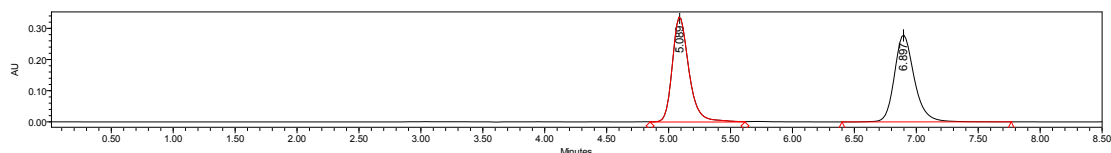

| Entry | Retention Time | Area    | % Area |
|-------|----------------|---------|--------|
| 1     | 5.089          | 3144709 | 50.28  |
| 2     | 6.897          | 3109494 | 49.72  |

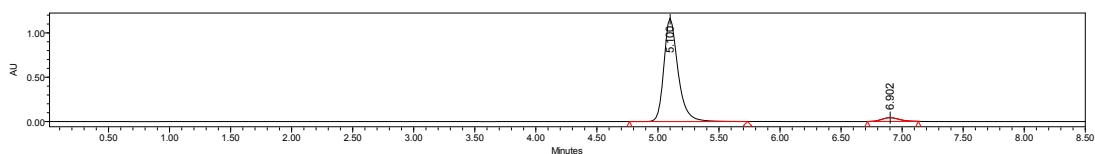

| Entry | Retention Time | Area    | % Area |
|-------|----------------|---------|--------|
| 1     | 5.100          | 9376375 | 95.65  |
| 2     | 6.902          | 426692  | 4.35   |

1,2-di-tert-butyl 3-methyl (R)-3-phenyl-5-(thiophen-2-yl)-1H-1,2,4-triazole-1,2,3(3H)-tricarboxylate (**3kb**)

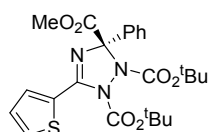

Colorless oil; 75% yield, 89% ee;  $[\alpha]^{14.2}_D = +42.3$  (c 0.73,  $\text{CH}_2\text{Cl}_2$ ); the ee was determined by HPLC analysis using a chiral IA column (*i*PrOH/hexane = 10/90, 1.0 mL/min,  $\lambda = 254$  nm),  $t$  (major) = 5.12 min,  $t$  (minor) = 6.17 min;  $^1\text{H}$  NMR (400 MHz,  $\text{CDCl}_3$ )  $\delta$  7.80 (dd,  $J = 4.0, 1.2$  Hz, 1H), 7.68 – 7.64 (m, 2H), 7.52 (dd,  $J = 5.2, 1.2$  Hz, 1H), 7.41 – 7.32 (m, 3H), 7.11 (dd,  $J = 4.8, 3.6$  Hz, 1H), 3.75 (s, 3H), 1.53 (s, 9H), 1.36 (s, 9H);  $^{13}\text{C}$  NMR (100 MHz,  $\text{CDCl}_3$ )  $\delta$  168.1, 153.4, 153.0, 151.1, 137.5, 134.5, 131.0, 130.3, 128.5, 127.8, 127.3, 127.2, 92.7, 84.4, 82.9, 53.2, 28.1, 27.7; HRMS (ESI-TOF): Calcd for  $\text{C}_{24}\text{H}_{29}\text{N}_3\text{O}_6\text{SNa}^+[\text{M}+\text{Na}]^+$  510.1675, Found 510.1666.

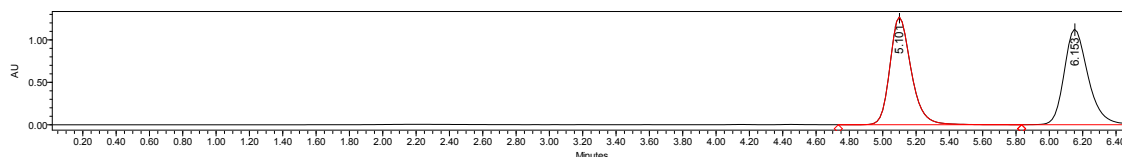

| Entry | Retention Time | Area     | % Area |
|-------|----------------|----------|--------|
| 1     | 5.101          | 11203643 | 50.06  |
| 2     | 6.153          | 11175280 | 49.94  |

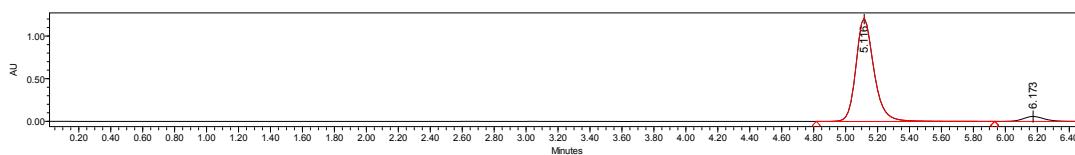

| Entry | Retention Time | Area    | % Area |
|-------|----------------|---------|--------|
| 1     | 5.116          | 9450368 | 94.56  |
| 2     | 6.173          | 544078  | 5.44   |

1,2-di-tert-butyl 3-methyl (R)-5-methyl-3-phenyl-1H-1,2,4-triazole-1,2,3(3H)-tricarboxylate (**3lb**)

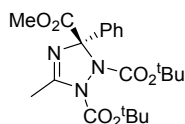

White solid; 90% yield, 92% ee;  $[\alpha]^{14.3}_D = -48.4$  (c 0.75,  $\text{CH}_2\text{Cl}_2$ ); the ee was determined by HPLC analysis using a chiral IE column (*i*PrOH/hexane = 20/80, 1.0 mL/min,  $\lambda = 254$  nm),  $t$  (major) = 7.40 min,  $t$  (minor) = 5.90 min;  $^1\text{H}$  NMR (400 MHz,  $\text{CDCl}_3$ )  $\delta$  7.63 – 7.61 (m, 2H), 7.40 – 7.31 (m, 3H), 3.75 (s, 3H), 2.40 (s, 3H), 1.51 (s, 9H), 1.48 (s, 9H);  $^{13}\text{C}$  NMR (100 MHz,  $\text{CDCl}_3$ )  $\delta$  168.5, 156.5, 153.6, 149.7, 137.8, 128.4, 127.8, 127.2, 93.5, 84.2, 83.1, 53.2, 28.0, 27.9, 17.2; HRMS (ESI-TOF): Calcd for  $\text{C}_{21}\text{H}_{29}\text{N}_3\text{O}_6\text{Na}^+[\text{M}+\text{Na}]^+$  442.1954, Found 442.1945.

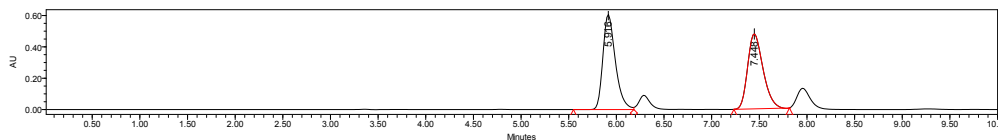

| Entry | Retention Time | Area    | % Area |
|-------|----------------|---------|--------|
| 1     | 5.916          | 5507141 | 50.66  |
| 2     | 7.448          | 5362739 | 49.34  |

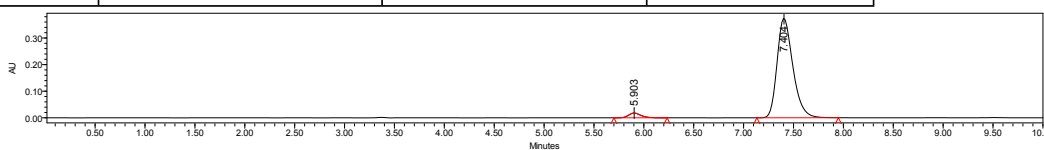

| Entry | Retention Time | Area    | % Area |
|-------|----------------|---------|--------|
| 1     | 5.903          | 153747  | 3.61   |
| 2     | 7.404          | 4110082 | 96.39  |

1,2-di-tert-butyl 3-methyl (R)-5-pentyl-3-phenyl-1H-1,2,4-triazole-1,2,3(3H)-tricarboxylate (**3mb**)

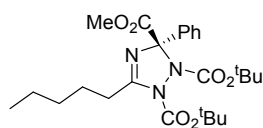

Colorless oil; 81% yield, 89% ee;  $[\alpha]^{14.1}_D = -24.7$  (c 0.76,  $\text{CH}_2\text{Cl}_2$ ); the ee was determined by HPLC analysis using a chiral IE column (*i*PrOH/hexane = 20/80, 1.0 mL/min,  $\lambda = 254$  nm),  $t$  (major) = 6.30 min,  $t$  (minor) = 4.79 min;  $^1\text{H}$  NMR (400 MHz,  $\text{CDCl}_3$ )  $\delta$  7.64 – 7.61 (m, 2H), 7.40 – 7.30 (m, 3H), 3.74 (s, 3H), 2.85 – 2.61 (m, 2H), 1.79 – 1.71 (m, 2H), 1.50 (s, 9H), 1.48 (s, 9H), 1.40 – 1.32 (m, 4H), 0.90 (t,  $J = 6.8$  Hz, 3H);  $^{13}\text{C}$  NMR (100 MHz,  $\text{CDCl}_3$ )  $\delta$  168.6, 160.0, 153.7, 149.8, 138.0, 128.3, 127.8, 127.2, 93.4, 84.0, 82.9, 53.1, 31.1, 30.3, 28.0, 27.9, 26.0, 22.3, 14.0; HRMS (ESI-TOF): Calcd for  $\text{C}_{21}\text{H}_{29}\text{N}_3\text{O}_6\text{Na}^+[\text{M}+\text{Na}]^+$  498.2580, Found 498.2585.

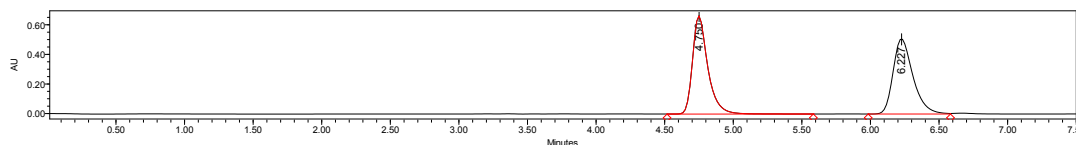

| Entry | Retention Time | Area    | % Area |
|-------|----------------|---------|--------|
| 1     | 4.750          | 5116683 | 50.03  |
| 2     | 6.227          | 5111116 | 49.97  |

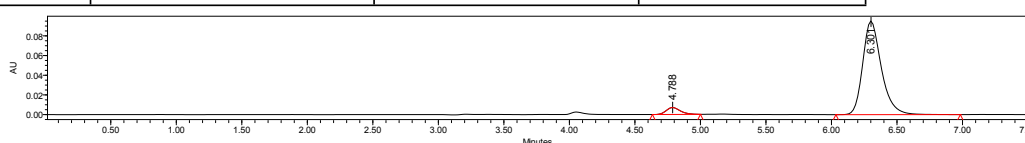

| Entry | Retention Time | Area | % Area |
|-------|----------------|------|--------|
| 1     | 4.790          |      |        |
| 2     | 6.300          |      |        |



|   |       |        |       |
|---|-------|--------|-------|
| 1 | 4.788 | 52435  | 5.30  |
| 2 | 6.301 | 936937 | 94.70 |

1,2-di-tert-butyl 3-methyl (R)-5-(4-methoxyphenyl)-1H-1,2,4-triazole-1,2,3(3H)-tricarboxylate (**3nb**)

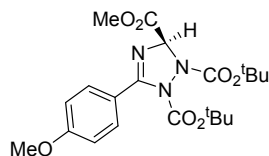

Colorless oil; 91% yield, 83% ee;  $[\alpha]^{14.1}_D = +85.6$  (c 0.44,  $\text{CH}_2\text{Cl}_2$ ); the ee was determined by HPLC analysis using a chiral IE column (*i*PrOH/hexane = 20/80, 1.0 mL/min,  $\lambda = 254$  nm),  $t$  (major) = 15.43 min,  $t$  (minor) = 13.82 min;  $^1\text{H}$  NMR (400 MHz,  $\text{CDCl}_3$ )  $\delta$  7.81 – 7.71 (m, 2H), 6.94 – 6.90 (m, 2H), 6.12 (s, 1H), 3.84 (s, 3H), 3.77 (s, 3H), 1.52 (s, 9H), 1.37 (s, 9H);  $^{13}\text{C}$  NMR (100 MHz,  $\text{CDCl}_3$ )  $\delta$  167.3, 162.5, 160.9, 155.3, 151.7, 131.7, 121.5, 113.3, 83.5, 83.1, 81.6, 55.4, 52.7, 28.1, 27.7; HRMS (ESI-TOF): Calcd for  $\text{C}_{21}\text{H}_{29}\text{N}_3\text{O}_7\text{Na}^+[\text{M}+\text{Na}]^+$  458.1903, Found 458.1906.

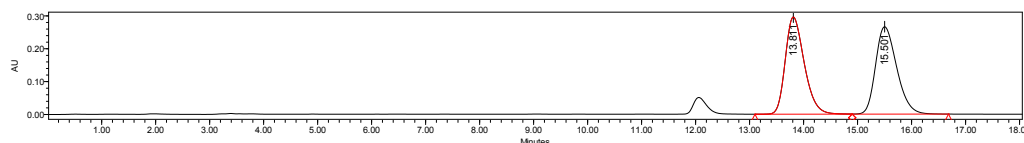

| Entry | Retention Time | Area    | % Area |
|-------|----------------|---------|--------|
| 1     | 13.811         | 7214892 | 49.97  |
| 2     | 15.501         | 7224775 | 50.03  |

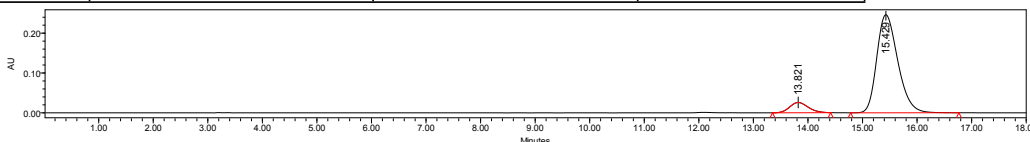

| Entry | Retention Time | Area    | % Area |
|-------|----------------|---------|--------|
| 1     | 13.821         | 605936  | 8.44   |
| 2     | 15.429         | 6577324 | 91.56  |

1,2-di-tert-butyl 3-methyl (R)-5-(4-methoxyphenyl)-3-methyl-1H-1,2,4-triazole-1,2,3(3H)-tricarboxylate (**3ob**)

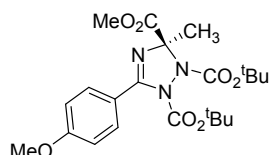

White solid; 84% yield, 89% ee;  $[\alpha]^{14.2}_D = +83.0$  (c 0.75,  $\text{CH}_2\text{Cl}_2$ ); the ee was determined by HPLC analysis using a chiral IA column (*i*PrOH/hexane = 5/95, 1.0 mL/min,  $\lambda = 254$  nm),  $t$  (major) = 6.14 min,  $t$  (minor) = 6.57 min;  $^1\text{H}$  NMR (400 MHz,  $\text{CDCl}_3$ )  $\delta$  7.80 – 7.76 (m, 2H), 6.92 – 6.88 (m, 2H), 3.84 (s, 3H), 3.72 (s, 3H), 1.74 (s, 3H), 1.49 (s, 9H), 1.33 (s, 9H);  $^{13}\text{C}$  NMR (100 MHz,  $\text{CDCl}_3$ )  $\delta$  168.9, 162.3, 158.8, 152.3, 151.7, 131.7, 121.4, 113.1, 89.0, 84.1, 82.2, 55.4, 52.8, 28.1, 27.7, 23.0; HRMS (ESI-TOF): Calcd for  $\text{C}_{22}\text{H}_{31}\text{N}_3\text{O}_7\text{Na}^+[\text{M}+\text{Na}]^+$  472.2060, Found 472.2069.

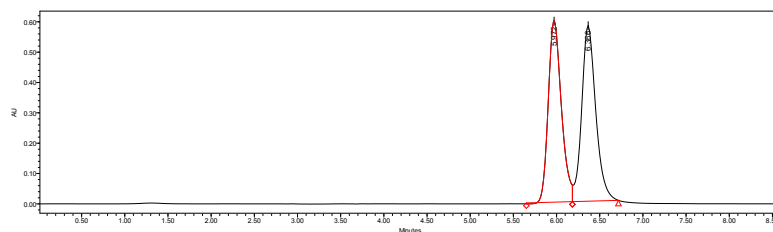

| Entry | Retention Time | Area    | % Area |
|-------|----------------|---------|--------|
| 1     | 5.972          | 6312743 | 49.04  |
| 2     | 6.366          | 6560431 | 50.96  |

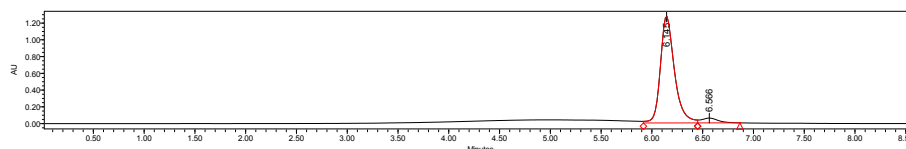

| Entry | Retention Time | Area     | % Area |
|-------|----------------|----------|--------|
| 1     | 6.145          | 12242732 | 94.88  |
| 2     | 6.566          | 660476   | 5.12   |

1,2-di-tert-butyl 3-methyl (R)-3-ethyl-5-(4-methoxyphenyl)-1H-1,2,4-triazole-1,2,3(3H)-tricarboxylate (**3pb**)

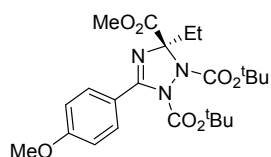

Colorless oil; 95% yield, 87% ee;  $[\alpha]^{14.1}_D = +79.5$  (c 0.87,  $\text{CH}_2\text{Cl}_2$ ); the ee was determined by HPLC analysis using a chiral IE column (*i*PrOH/hexane = 20/80, 1.0 mL/min,  $\lambda = 254$  nm),  $t$  (major) = 11.01 min,  $t$  (minor) = 8.49 min;  $^1\text{H}$  NMR (400 MHz,  $\text{CDCl}_3$ )  $\delta$  7.81 – 7.76 (m, 2H), 6.92 – 6.88 (m, 2H), 3.83 (s, 3H), 3.70 (s, 3H), 2.19 (q,  $J = 7.6$  Hz, 2H), 1.48 (s, 9H), 1.33 (s, 9H), 0.89 (t,  $J = 7.2$  Hz, 3H);  $^{13}\text{C}$  NMR (100 MHz,  $\text{CDCl}_3$ )  $\delta$  168.9, 162.2, 159.0, 151.3, 131.5, 121.6, 113.1, 92.4, 84.0, 82.2, 55.4, 52.7, 28.1, 27.7, 6.7; HRMS (ESI-TOF): Calcd for  $\text{C}_{23}\text{H}_{33}\text{N}_3\text{O}_7\text{Na}^+[\text{M}+\text{Na}]^+$  486.2216, Found 486.2224.

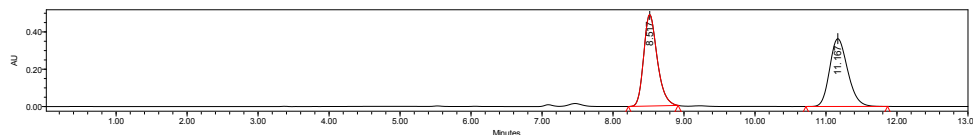

| Entry | Retention Time | Area    | % Area |
|-------|----------------|---------|--------|
| 1     | 8.517          | 6483560 | 50.37  |
| 2     | 11.167         | 6388289 | 49.63  |

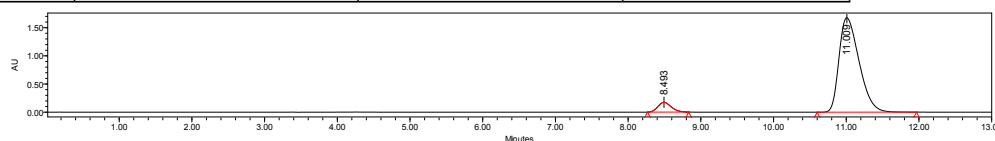

| Entry | Retention Time | Area    | % Area |
|-------|----------------|---------|--------|
| 1     | 8.493          | 2204631 | 6.43   |

|   |        |          |       |
|---|--------|----------|-------|
| 2 | 11.009 | 32064456 | 93.57 |
|---|--------|----------|-------|

1,2-di-tert-butyl 3-methyl (R)-3-isopropyl-5-(4-methoxyphenyl)-1H-1,2,4-triazole-1,2,3(3H)-tricarboxylate (**3qb**)

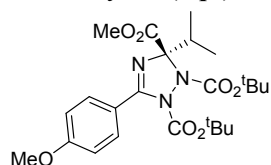

Colorless oil; 89% yield, 82% ee;  $[\alpha]^{14.1}_D = +79.0$  (c 0.30,  $\text{CH}_2\text{Cl}_2$ ); the ee was determined by HPLC analysis using a chiral IE column (*i*PrOH/hexane = 20/80, 1.0 mL/min,  $\lambda = 254$  nm), *t* (major) = 10.62 min, *t* (minor) = 7.68 min;  $^1\text{H}$  NMR (400 MHz,  $\text{CDCl}_3$ )  $\delta$  7.79 – 7.75 (m, 2H), 6.93 – 6.89 (m, 2H), 3.83 (s, 3H), 3.68 (s, 3H), 2.64 – 2.56 (m, 1H), 1.49 (s, 9H), 1.34 (s, 9H), 1.11 (d,  $J = 6.8$  Hz, 3H), 0.94 (d,  $J = 6.8$  Hz, 3H);  $^{13}\text{C}$  NMR (100 MHz,  $\text{CDCl}_3$ )  $\delta$  168.0, 162.2, 158.3, 151.2, 131.5, 121.6, 113.2, 94.9, 83.7, 82.3, 55.4, 52.5, 33.6, 28.0, 27.7, 17.3, 16.3; HRMS (ESI-TOF): Calcd for  $\text{C}_{24}\text{H}_{35}\text{N}_3\text{O}_7\text{Na}^+[\text{M}+\text{Na}]^+$  500.2373, Found 500.2379.

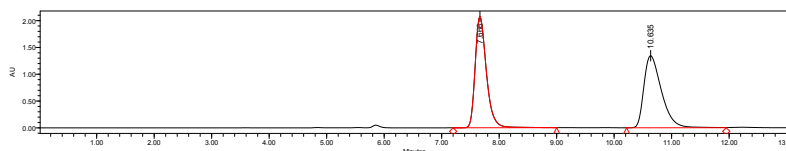

| Entry | Retention Time | Area     | % Area |
|-------|----------------|----------|--------|
| 1     | 7.666          | 28091251 | 49.66  |
| 2     | 10.635         | 28477020 | 50.34  |

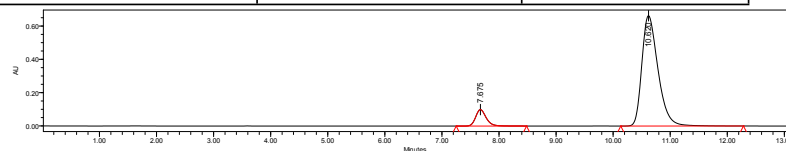

| Entry | Retention Time | Area     | % Area |
|-------|----------------|----------|--------|
| 1     | 7.675          | 1260761  | 8.85   |
| 2     | 10.620         | 12979841 | 91.15  |

1,2-di-tert-butyl 3-methyl (R)-3-(4-fluorophenyl)-5-phenyl-1H-1,2,4-triazole-1,2,3(3H)-tricarboxylate (**3rb**)

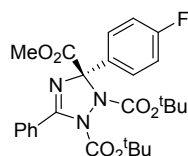

Colorless oil; 94% yield, 95% ee;  $[\alpha]^{14.1}_D = +42.4$  (c 0.93,  $\text{CH}_2\text{Cl}_2$ ); the ee was determined by HPLC analysis using a chiral IA column (*i*PrOH/hexane = 10/90, 1.0 mL/min,  $\lambda = 254$  nm), *t* (major) = 4.31 min, *t* (minor) = 4.92 min;  $^1\text{H}$  NMR (400 MHz,  $\text{CDCl}_3$ )  $\delta$  7.86 – 7.83 (m, 2H), 7.71 – 7.67 (m, 2H), 7.52 – 7.48 (m, 1H), 7.44 – 7.40 (m, 2H), 7.11 – 7.07 (m, 2H), 3.74 (s, 3H), 1.54 (s, 9H), 1.26 (s, 9H);  $^{13}\text{C}$  NMR (100 MHz,  $\text{CDCl}_3$ )  $\delta$  168.2, 162.8 (d,  $J = 245.7$  Hz), 159.3, 153.3, 150.9, 133.6 (d,  $J = 3.1$  Hz), 133.5, 131.7, 129.9, 129.2 (d,  $J = 8.2$  Hz), 128.9, 127.9, 114.8 (d,  $J = 21.5$  Hz), 92.8, 84.3, 83.1, 53.3, 28.1, 27.6; HRMS (ESI-TOF): Calcd for

C<sub>26</sub>H<sub>30</sub>FN<sub>3</sub>O<sub>6</sub>Na<sup>+</sup>[M+Na]<sup>+</sup> 522.2016, Found 522.2009.

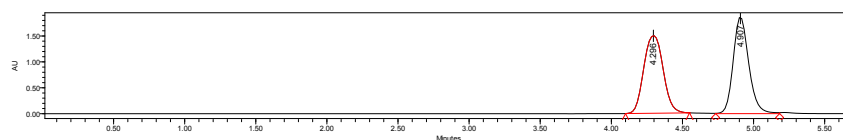

| Entry | Retention Time | Area     | % Area |
|-------|----------------|----------|--------|
| 1     | 4.296          | 14157624 | 49.89  |
| 2     | 4.907          | 14217357 | 50.11  |

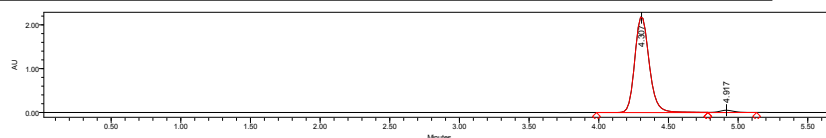

| Entry | Retention Time | Area     | % Area |
|-------|----------------|----------|--------|
| 1     | 4.307          | 15790803 | 97.63  |
| 2     | 4.917          | 383158   | 2.37   |

1,2-di-tert-butyl 3-methyl (R)-3-(4-bromophenyl)-5-phenyl-1H-1,2,4-triazole-1,2,3(3H)-tricarboxylate (**3sb**)

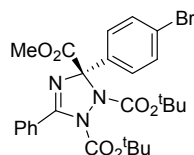

Colorless oil; 81% yield, 96% ee;  $[\alpha]^{14.1}_D = +19.7$  (c 0.90, CH<sub>2</sub>Cl<sub>2</sub>); the ee was determined by HPLC analysis using a chiral IA column (*i*PrOH/hexane = 10/90, 1.0 mL/min,  $\lambda = 254$  nm), *t* (major) = 4.70 min, *t* (minor) = 5.38 min; <sup>1</sup>H NMR (400 MHz, CDCl<sub>3</sub>)  $\delta$  7.84 – 7.82 (m, 2H), 7.60 – 7.48 (m, 5H), 7.42 (t, *J* = 7.2 Hz, 2H), 3.74 (s, 3H), 1.54 (s, 9H), 1.26 (s, 9H); <sup>13</sup>C NMR (100 MHz, CDCl<sub>3</sub>)  $\delta$  167.9, 159.4, 153.2, 150.7, 136.8, 131.8, 131.1, 129.9, 129.1, 128.8, 127.9, 122.8, 92.9, 84.4, 83.1, 53.4, 28.1, 27.6; HRMS (ESI-TOF): Calcd for C<sub>26</sub>H<sub>30</sub><sup>78,9183</sup>BrN<sub>3</sub>O<sub>6</sub>Na<sup>+</sup> [M+Na]<sup>+</sup> 582.1216, Found 582.1215; Calcd for C<sub>26</sub>H<sub>30</sub><sup>80,9163</sup>BrN<sub>3</sub>O<sub>6</sub>Na<sup>+</sup> [M+Na]<sup>+</sup> 584.1195, Found 584.1207.

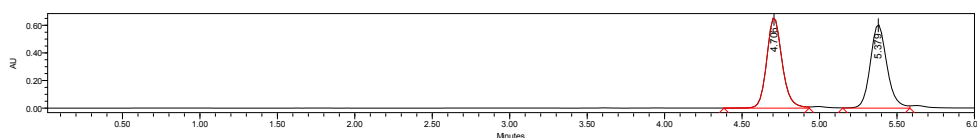

| Entry | Retention Time | Area    | % Area |
|-------|----------------|---------|--------|
| 1     | 4.706          | 4530996 | 50.10  |
| 2     | 5.379          | 4512859 | 49.90  |

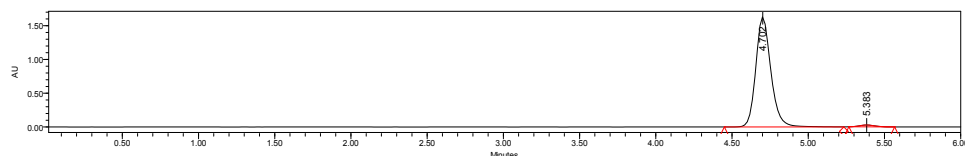

| Entry | Retention Time | Area     | % Area |
|-------|----------------|----------|--------|
| 1     | 4.702          | 11243457 | 98.36  |

|   |       |        |      |
|---|-------|--------|------|
| 2 | 5.383 | 187942 | 1.64 |
|---|-------|--------|------|

1,2-di-tert-butyl 3-methyl (R)-3-(4-chlorophenyl)-5-phenyl-1H-1,2,4-triazole-1,2,3(3H)-tricarboxylate (**3tb**)

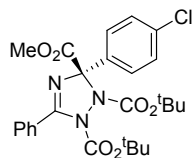

Colorless oil; 88% yield, 96% ee;  $[\alpha]^{14.1}_D = +25.5$  (c 0.90,  $\text{CH}_2\text{Cl}_2$ ); the ee was determined by HPLC analysis using a chiral IA column (*i*PrOH/hexane = 10/90, 1.0 mL/min,  $\lambda = 254$  nm), *t* (major) = 4.59 min, *t* (minor) = 5.24 min;  $^1\text{H}$  NMR (400 MHz,  $\text{CDCl}_3$ )  $\delta$  7.85 – 7.82 (m, 2H), 7.67 – 7.63 (m, 2H), 7.52 – 7.48 (m, 1H), 7.44 – 7.42 (m, 2H), 7.40 – 7.36 (m, 2H), 3.74 (s, 3H), 1.54 (s, 9H), 1.26 (s, 9H);  $^{13}\text{C}$  NMR (100 MHz,  $\text{CDCl}_3$ )  $\delta$  168.0, 159.4, 153.2, 150.7, 136.3, 134.5, 131.8, 129.9, 128.8, 128.1, 127.9, 92.9, 84.4, 83.1, 53.3, 28.1, 27.6; HRMS (ESI-TOF): Calcd for  $\text{C}_{26}\text{H}_{31}^{34.9689}\text{ClN}_3\text{O}_6[\text{M}+\text{H}]^+$  516.1901, Found 516.1900; Calcd for  $\text{C}_{26}\text{H}_{31}^{36.9659}\text{ClN}_3\text{O}_6[\text{M}+\text{H}]^+$  518.1872, Found 518.1869.

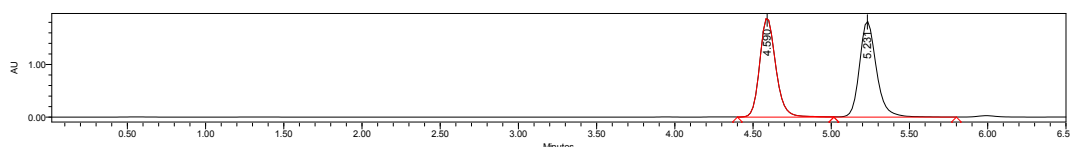

| Entry | Retention Time | Area     | % Area |
|-------|----------------|----------|--------|
| 1     | 4.590          | 13481202 | 49.62  |
| 2     | 5.231          | 13688222 | 50.38  |

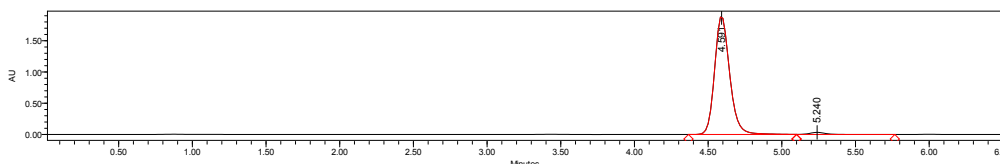

| Entry | Retention Time | Area     | % Area |
|-------|----------------|----------|--------|
| 1     | 4.591          | 13491193 | 98.08  |
| 2     | 5.240          | 264360   | 1.92   |

1,2-di-tert-butyl 3-methyl (R)-3-(4-methoxyphenyl)-5-phenyl-1H-1,2,4-triazole-1,2,3(3H)-tricarboxylate (**3ub**)

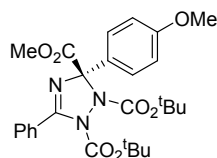

Colorless oil; 74% yield, 94% ee;  $[\alpha]^{14.1}_D = +28.5$  (c 0.61,  $\text{CH}_2\text{Cl}_2$ ); the ee was determined by HPLC analysis using a chiral IA column (*i*PrOH/hexane = 10/90, 1.0 mL/min,  $\lambda = 254$  nm), *t* (major) = 5.47 min, *t* (minor) = 8.08 min;  $^1\text{H}$  NMR (400 MHz,  $\text{CDCl}_3$ )  $\delta$  7.86 – 7.83 (m, 2H), 7.64 – 7.60 (m, 2H), 7.50 – 7.46 (m, 1H), 7.43 – 7.39 (m, 2H), 6.97 – 6.91 (m, 2H), 3.83 (s, 3H), 3.74

(s, 3H), 1.54 (s, 9H), 1.27 (s, 9H);  $^{13}\text{C}$  NMR (100 MHz,  $\text{CDCl}_3$ )  $\delta$  168.5, 159.7, 159.0, 153.3, 150.9, 131.6, 129.9, 129.7, 129.1, 128.5, 127.8, 113.3, 93.1, 84.1, 82.8, 55.2, 53.2, 28.1, 27.6; HRMS (ESI-TOF): Calcd for  $\text{C}_{27}\text{H}_{33}\text{N}_3\text{O}_7\text{Na}^+[\text{M}+\text{Na}]^+$  534.2216, Found 534.2203.

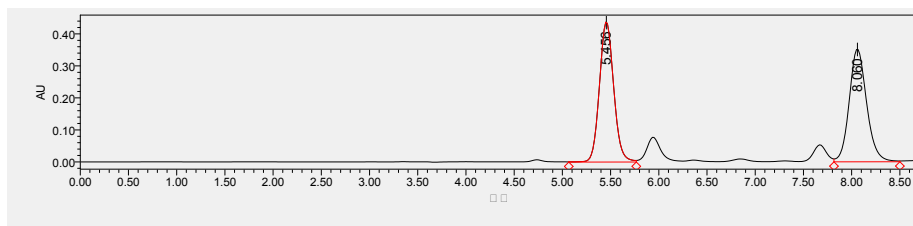

| Entry | Retention Time | Area    | % Area |
|-------|----------------|---------|--------|
| 1     | 5.456          | 4497471 | 50.36  |
| 2     | 8.060          | 4432372 | 49.64  |

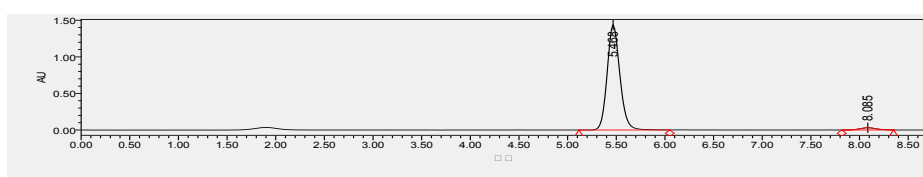

| Entry | Retention Time | Area     | % Area |
|-------|----------------|----------|--------|
| 1     | 5.468          | 13078724 | 97.36  |
| 2     | 8.085          | 354287   | 2.64   |

1,2-di-tert-butyl 3-methyl (R)-5-phenyl-3-(p-tolyl)-1H-1,2,4-triazole-1,2,3(3H)-tricarboxylate (**3vb**)

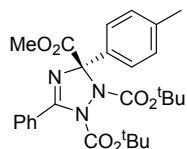

Colorless oil; 99% yield, 95% ee;  $[\alpha]^{14.1}_D = +27.4$  (c 0.93,  $\text{CH}_2\text{Cl}_2$ ); the ee was determined by HPLC analysis using a chiral IA column (*i*PrOH/hexane = 10/90, 1.0 mL/min,  $\lambda = 254$  nm),  $t$  (major) = 4.67 min,  $t$  (minor) = 6.59 min;  $^1\text{H}$  NMR (400 MHz,  $\text{CDCl}_3$ )  $\delta$  7.86 – 7.84 (m, 2H), 7.61 – 7.59 (m, 2H), 7.51 – 7.47 (m, 1H), 7.43 – 7.39 (m, 2H), 7.24 – 7.21 (m, 2H), 3.74 (s, 3H), 2.38 (s, 3H), 1.54 (s, 9H), 1.28 (s, 9H);  $^{13}\text{C}$  NMR (100 MHz,  $\text{CDCl}_3$ )  $\delta$  168.4, 159.0, 153.3, 150.9, 138.3, 134.6, 131.6, 129.9, 129.1, 128.6, 127.8, 127.2, 93.4, 84.1, 82.8, 53.2, 28.1, 27.6, 21.2; HRMS (ESI-TOF): Calcd for  $\text{C}_{27}\text{H}_{33}\text{N}_3\text{O}_6\text{Na}^+[\text{M}+\text{Na}]^+$  518.2267, Found 518.2260.

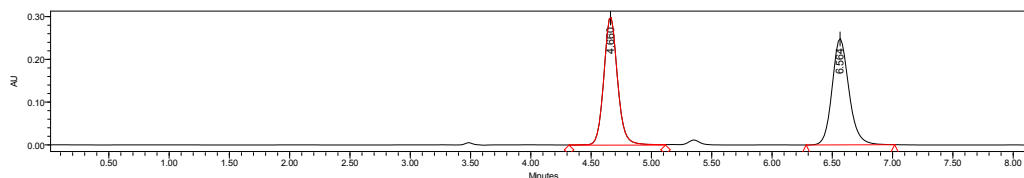

| Entry | Retention Time | Area    | % Area |
|-------|----------------|---------|--------|
| 1     | 4.660          | 2382395 | 49.73  |
| 2     | 6.564          | 2408126 | 50.27  |

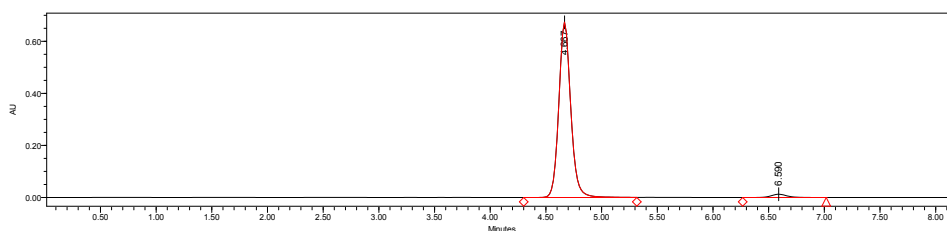

| Entry | Retention Time | Area    | % Area |
|-------|----------------|---------|--------|
| 1     | 4.667          | 5024142 | 97.60  |
| 2     | 6.590          | 123648  | 2.40   |

1,2-di-tert-butyl 3-methyl (R)-3-(3-chlorophenyl)-5-phenyl-1H-1,2,4-triazole-1,2,3(3H)-ntricarboxylate (**3wb**)

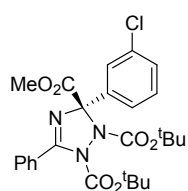

Colorless oil; 70% yield, 92% ee;  $[\alpha]^{14.1}_D = +35.8$  (c 0.65,  $\text{CH}_2\text{Cl}_2$ ); the ee was determined by HPLC analysis using a chiral IA column (*i*PrOH/hexane = 10/90, 1.0 mL/min,  $\lambda = 254$  nm),  $t$  (major) = 4.28 min,  $t$  (minor) = 4.67 min;  $^1\text{H}$  NMR (400 MHz,  $\text{CDCl}_3$ )  $\delta$  7.87 – 7.85 (m, 2H), 7.71 – 7.70 (m, 1H), 7.63 – 7.58 (m, 1H), 7.53 – 7.49 (m, 1H), 7.45 – 7.41 (m, 2H), 7.36 – 7.33 (m, 2H), 3.75 (s, 3H), 1.55 (s, 9H), 1.32 (s, 9H);  $^{13}\text{C}$  NMR (101 MHz,  $\text{CDCl}_3$ )  $\delta$  167.9, 159.6, 153.1, 150.8, 139.7, 133.8, 131.9, 130.1, 129.3, 128.7, 128.7, 127.9, 127.4, 125.8, 92.7, 84.5, 83.2, 53.4, 28.1, 27.6; HRMS (ESI-TOF): Calcd for  $\text{C}_{26}\text{H}_{30}^{34,9689}\text{ClN}_3\text{O}_6\text{Na}^+[\text{M}+\text{Na}]^+$  538.1721, Found 538.1716; Calcd for  $\text{C}_{26}\text{H}_{30}^{36,9659}\text{ClN}_3\text{O}_6\text{Na}^+[\text{M}+\text{Na}]^+$  540.1691, Found 540.1699.

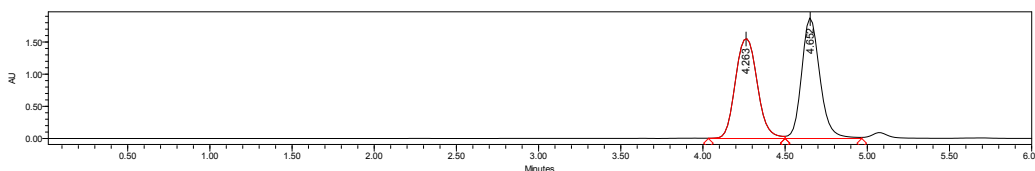

| Entry | Retention Time | Area     | % Area |
|-------|----------------|----------|--------|
| 1     | 4.263          | 14420104 | 49.91  |
| 2     | 4.652          | 14472713 | 50.09  |

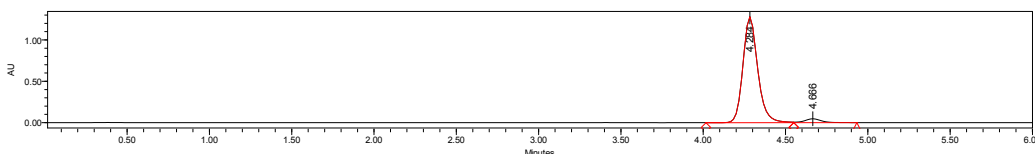

| Entry | Retention Time | Area    | % Area |
|-------|----------------|---------|--------|
| 1     | 4.284          | 7980657 | 96.09  |
| 2     | 4.666          | 324918  | 3.91   |

1,2-diethyl 3-methyl (R)-3-(2-chlorophenyl)-5-phenyl-1H-1,2,4-triazole-1,2,3(3H)-tricarboxylate (**3xa**)

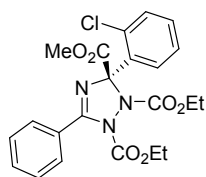

Colorless oil; 75% yield, 87% ee;  $[\alpha]^{18.7}_D = +65.2$  (c 0.60,  $\text{CH}_2\text{Cl}_2$ ); the ee was determined by HPLC analysis using a chiral IB column (*i*PrOH/hexane = 10/90, 1.0 mL/min,  $\lambda = 254$  nm),  $t$  (major) = 7.29 min,  $t$  (minor) = 8.27 min;  $^1\text{H}$  NMR (400 MHz,  $\text{CDCl}_3$ )  $\delta$  7.86 – 7.84 (m, 2H), 7.81 – 7.84 (m, 1H), 7.52 – 7.46 (m, 2H), 7.42 – 7.38 (m, 2H), 7.35 – 7.26 (m, 2H), 4.31 – 4.06 (m, 4H), 3.80 (s, 3H), 1.30 (t,  $J = 7.0$  Hz, 3H), 1.12 (t,  $J = 7.1$  Hz, 3H);  $^{13}\text{C}$  NMR (100 MHz,  $\text{CDCl}_3$ )  $\delta$  166.6, 158.7, 154.7, 152.1, 134.2, 132.0, 131.3, 130.2, 130.2, 128.2, 127.8, 126.6, 94.5, 63.9, 63.4, 53.5, 14.3, 13.9; HRMS (ESI-TOF): Calcd for  $\text{C}_{22}\text{H}_{22}^{34.9689}\text{ClN}_3\text{O}_6\text{Na}^+[\text{M}+\text{Na}]^+$  482.1095, Found 482.1099; Calcd for  $\text{C}_{22}\text{H}_{22}^{36.9659}\text{ClN}_3\text{O}_6\text{Na}^+[\text{M}+\text{Na}]^+$  484.1065, Found 484.1080.

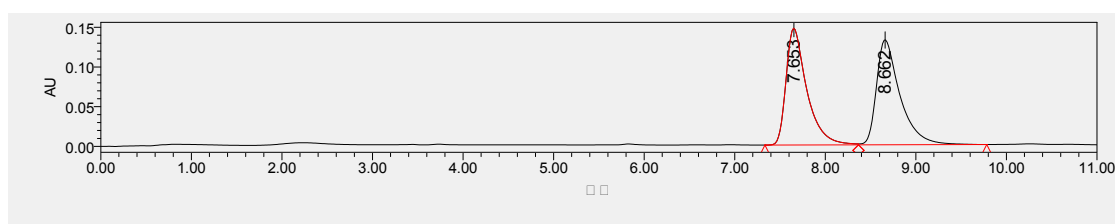

| Entry | Retention Time | Area    | % Area |
|-------|----------------|---------|--------|
| 1     | 7.653          | 2339238 | 49.52  |
| 2     | 8.662          | 2384131 | 50.48  |

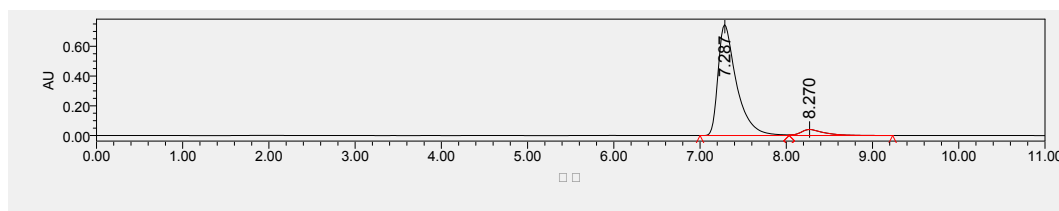

| Entry | Retention Time | Area     | % Area |
|-------|----------------|----------|--------|
| 1     | 7.287          | 11047728 | 93.52  |
| 2     | 8.270          | 764983   | 6.48   |

1,2-di-tert-butyl 3-ethyl (R)-5-(4-methoxyphenyl)-3-phenyl-1H-1,2,4-triazole-1,2,3(3H)-tricarboxylate (**3yb**)

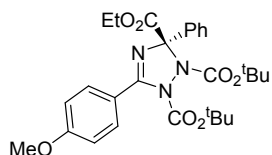

Colorless oil; 99% yield, 94% ee;  $[\alpha]^{14.0}_D = +72.6$  (c 1.03,  $\text{CH}_2\text{Cl}_2$ ); the ee was determined by HPLC analysis using a chiral IA column (*i*PrOH/hexane = 10/90, 1.0 mL/min,  $\lambda = 254$  nm),  $t$  (major) = 5.22 min,  $t$  (minor) = 6.67 min;  $^1\text{H}$  NMR (400 MHz,  $\text{CDCl}_3$ )  $\delta$  7.86 – 7.82 (m, 2H), 7.71 – 7.69 (m, 2H), 7.42 – 7.32 (m, 3H), 6.94 – 6.91 (m, 2H), 4.24 – 4.15 (m, 2H), 3.84 (s, 3H), 1.54 (s, 9H), 1.30 (s, 9H), 1.22 (t,  $J = 7.2$  Hz, 3H);  $^{13}\text{C}$  NMR (100 MHz,  $\text{CDCl}_3$ )  $\delta$  167.9, 162.3, 158.6,



153.1, 151.3, 137.9, 131.9, 128.3, 127.8, 127.3, 121.2, 113.2, 93.0, 84.0, 82.6, 62.6, 55.4, 28.1, 27.7, 13.8; HRMS (ESI-TOF): Calcd for C<sub>28</sub>H<sub>35</sub>N<sub>3</sub>O<sub>7</sub>Na<sup>+</sup>[M+Na]<sup>+</sup> 548.2373, Found 548.2367.

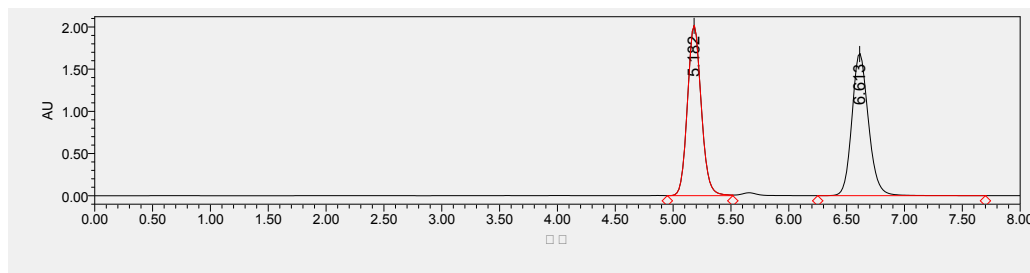

| Entry | Retention Time | Area     | % Area |
|-------|----------------|----------|--------|
| 1     | 5.182          | 16732563 | 49.84  |
| 2     | 6.613          | 16843098 | 50.16  |

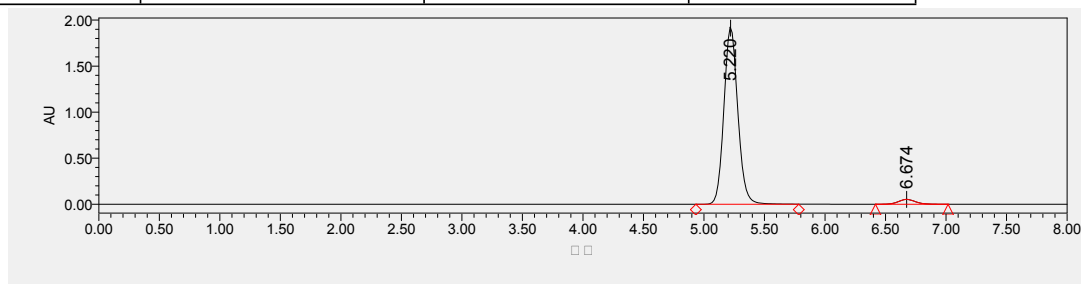

| Entry | Retention Time | Area     | % Area |
|-------|----------------|----------|--------|
| 1     | 5.220          | 15357023 | 96.75  |
| 2     | 6.674          | 515219   | 3.25   |

**(H) Copies of NMR spectra for the products**

1,2-di-tert-butyl 3-methyl (R)-5-(4-methoxyphenyl)-3-phenyl-1H-1,2,4-triazole-1,2,3(3H)-tricarboxylate (**3ab**)

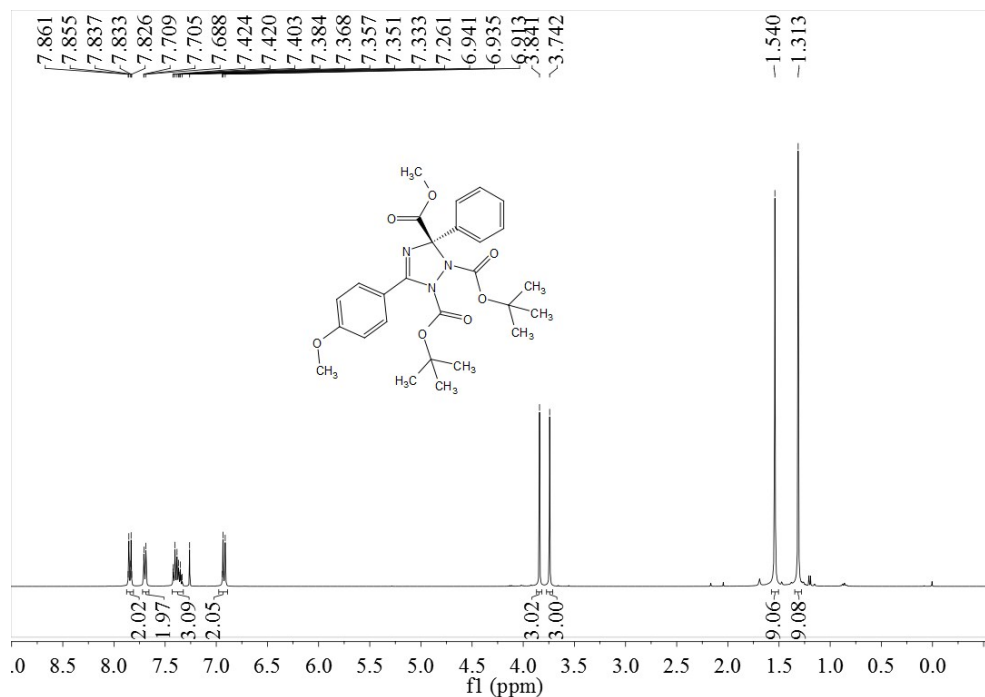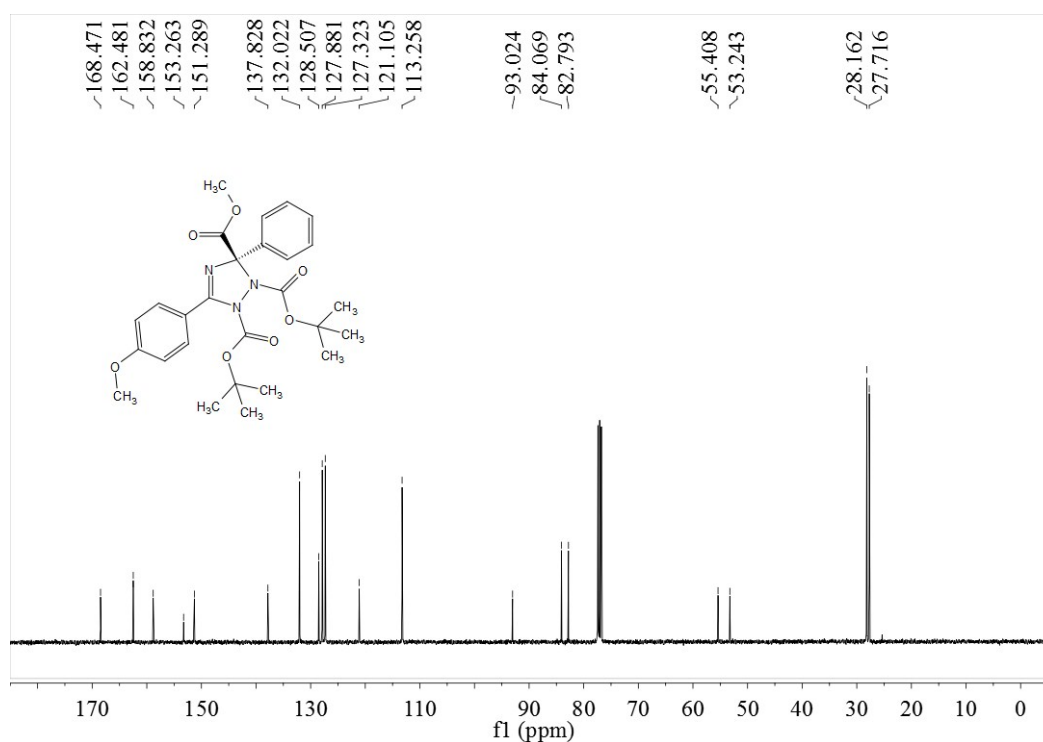

1,2-di-tert-butyl 3-methyl (R)-5-(3-methoxyphenyl)-3-phenyl-1H-1,2,4-triazole-1,2,3(3H)-tricarboxylate (**3bb**)

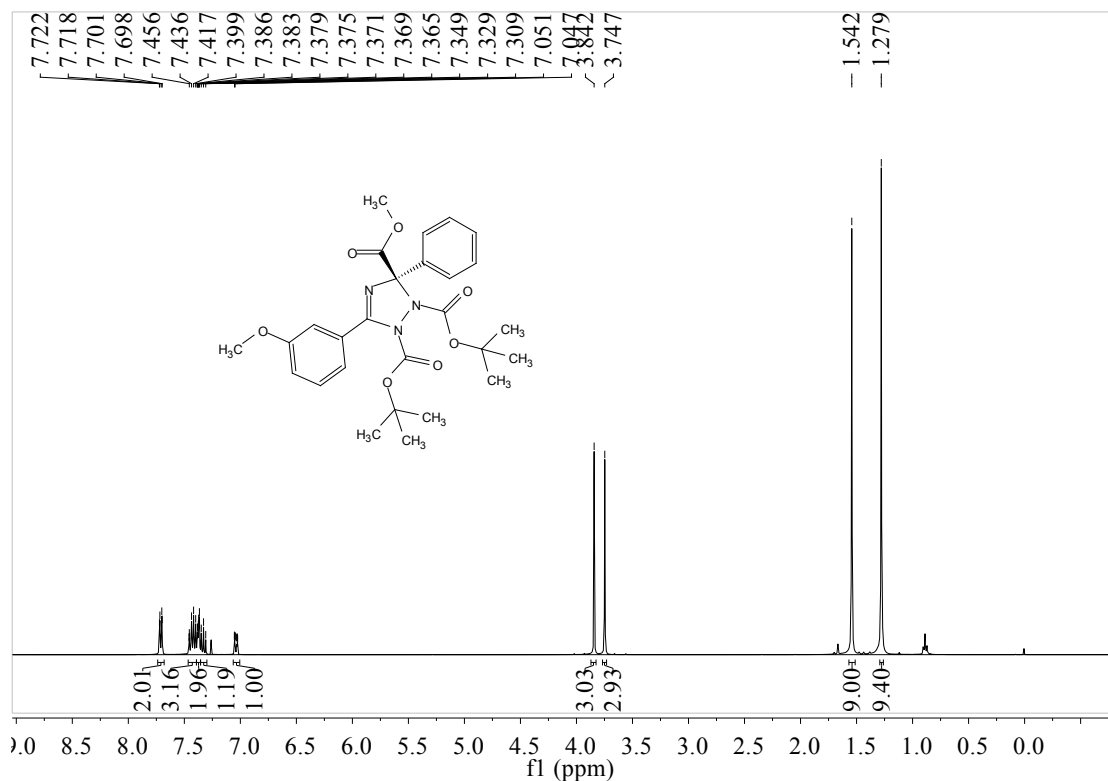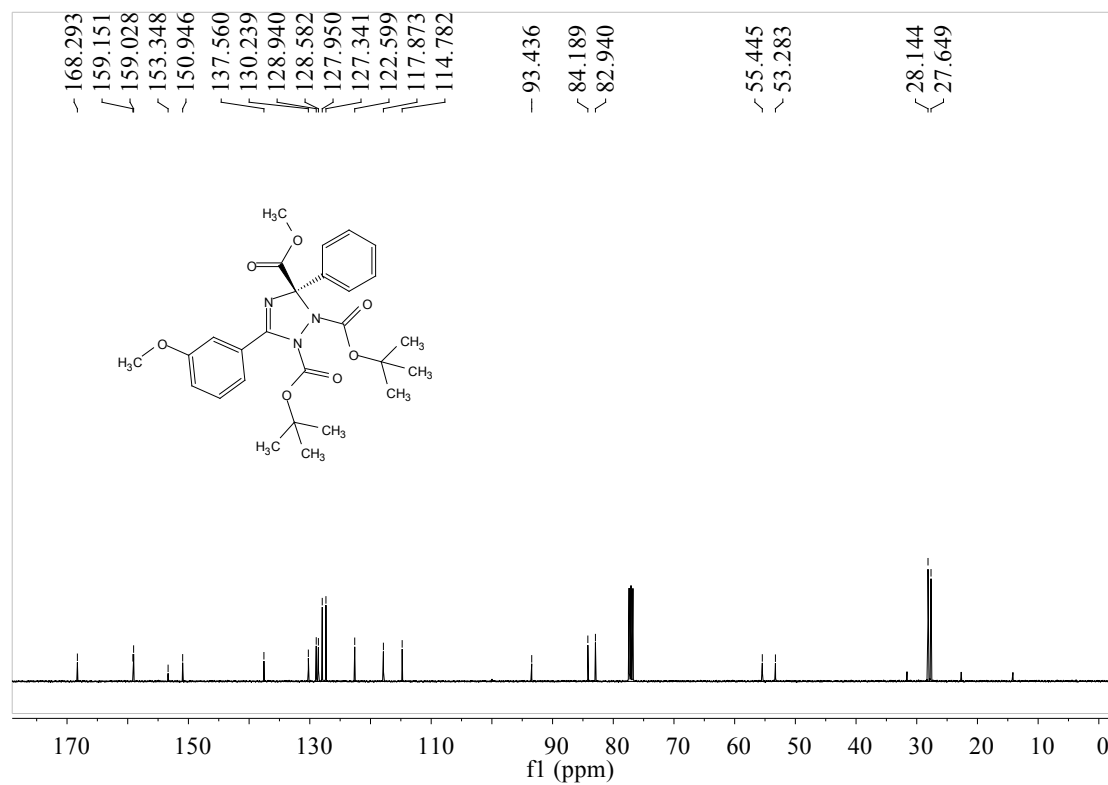

1,2-di-tert-butyl 3-methyl (R)-5-(4-ethoxyphenyl)-3-phenyl-1H-1,2,4-triazole-1,2,3(3H)-tricarboxylate (**3cb**)

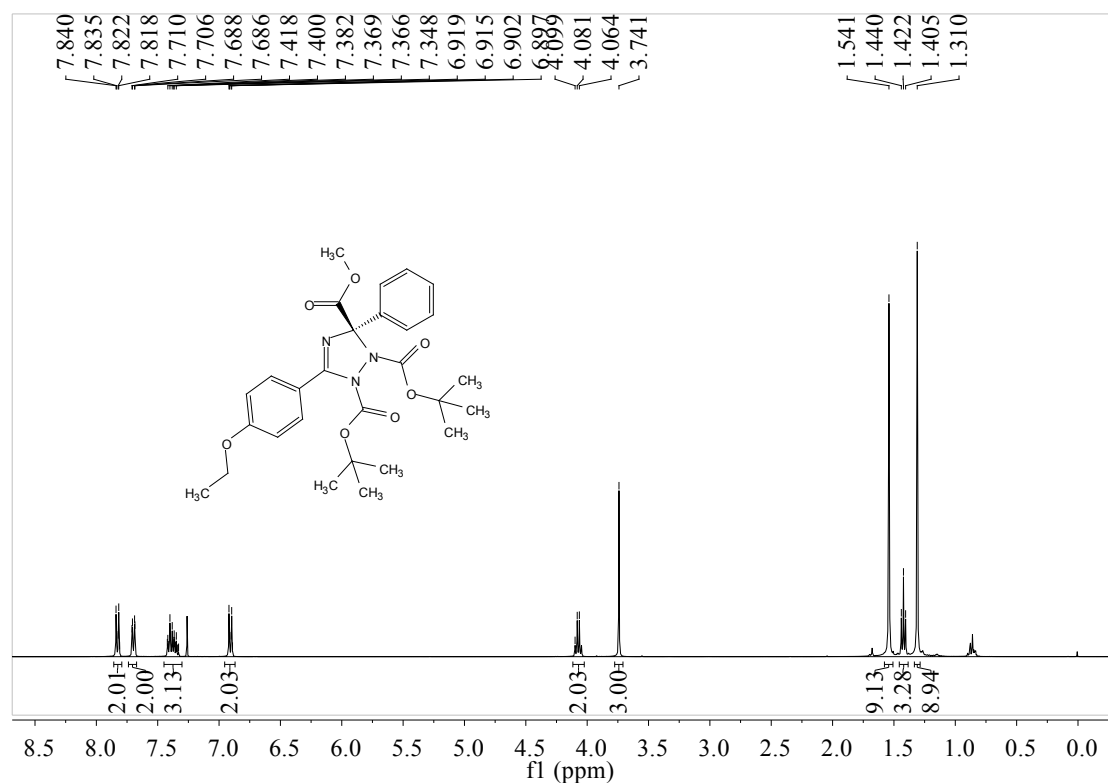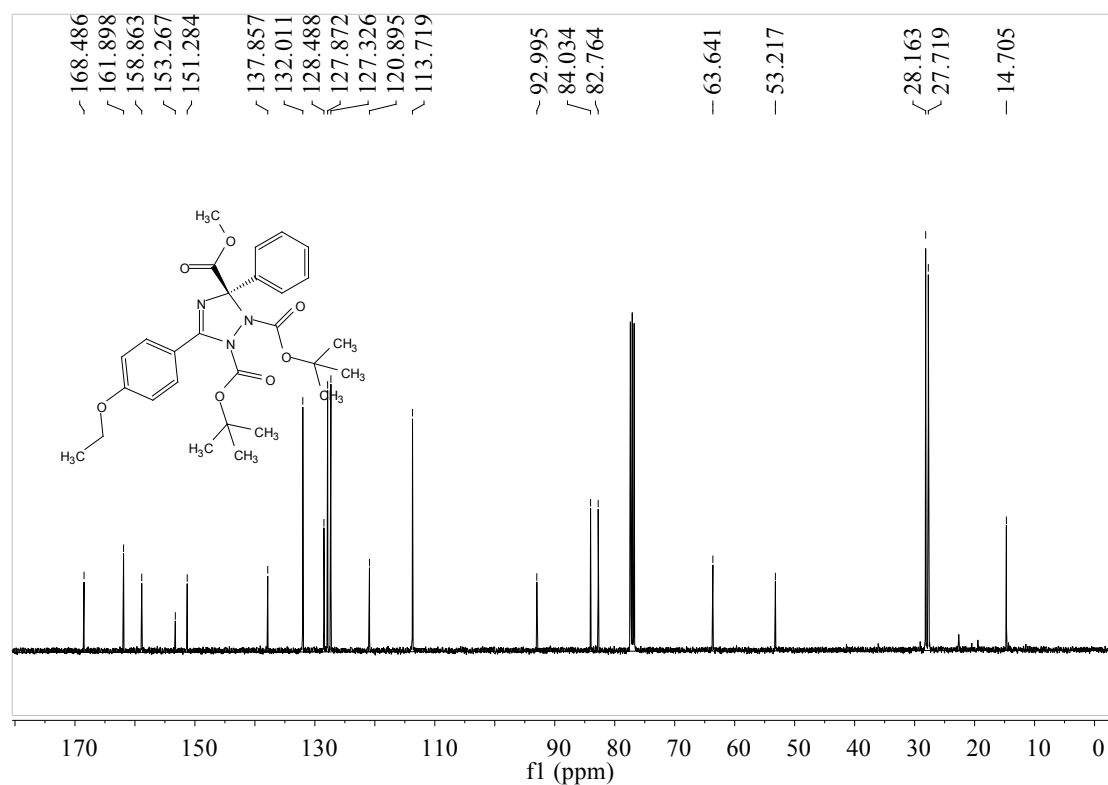

1,2-di-tert-butyl 3-methyl (R)-5-(4-(tert-butyl)phenyl)-3-phenyl-1H-1,2,4-triazole-1,2,3(H)-tricarboxylate (**3db**)

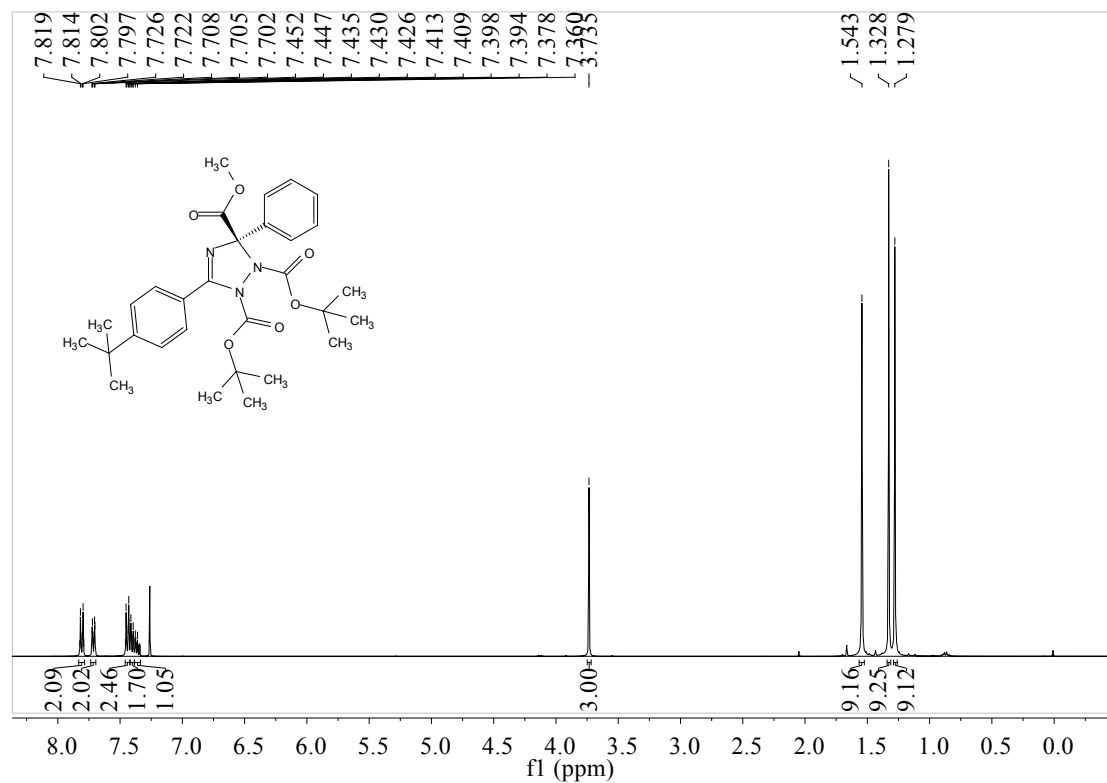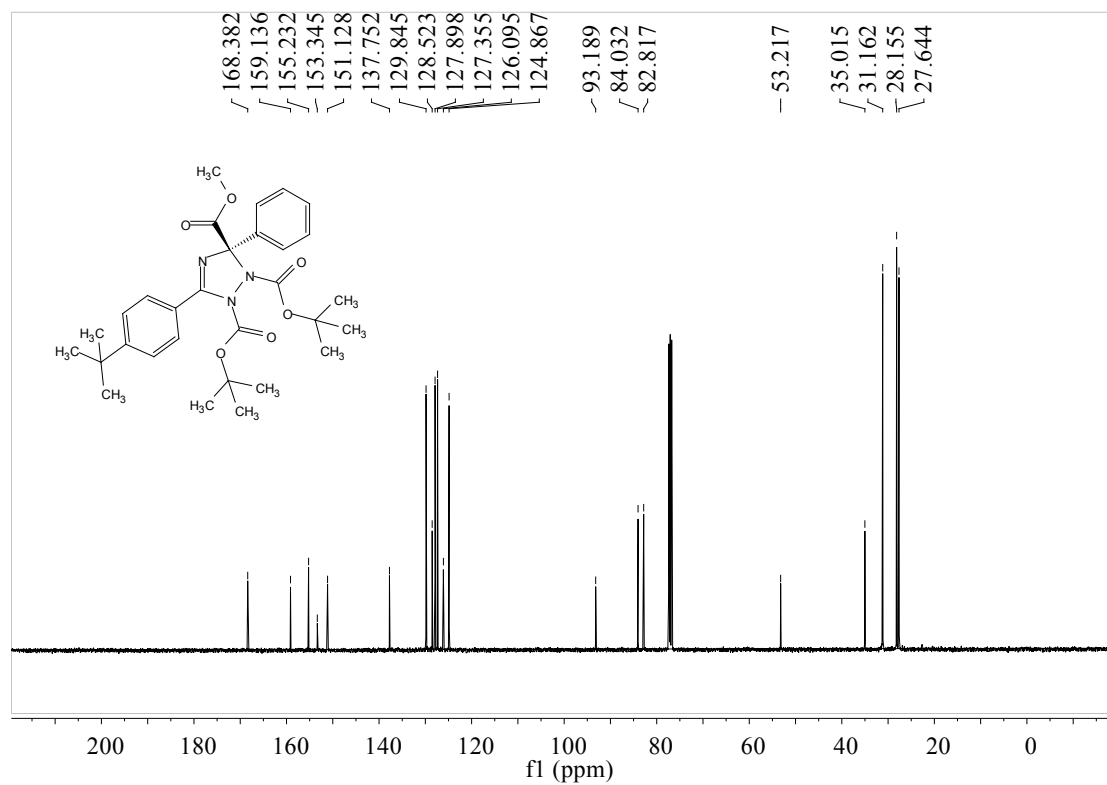

1,2-di-tert-butyl 3-methyl (R)-5-(3,5-dimethylphenyl)-3-phenyl-1H-1,2,4-triazole-1,2,3(H)-tricarboxylate (**3eb**)

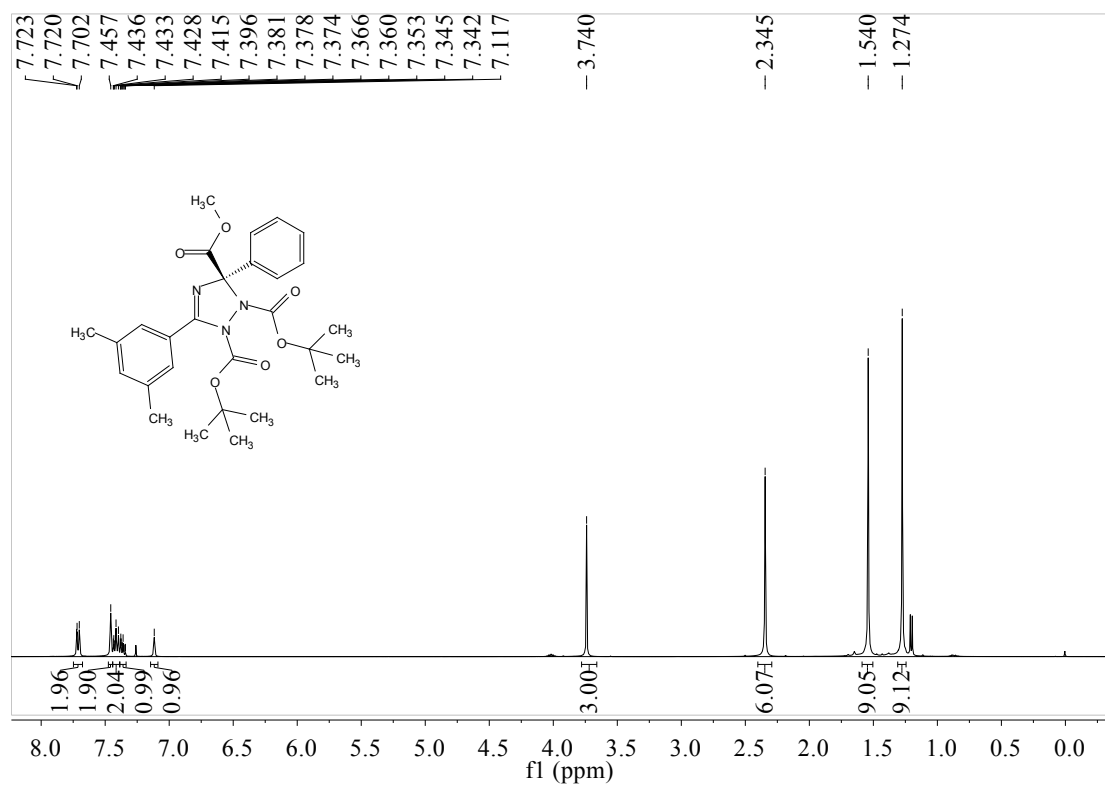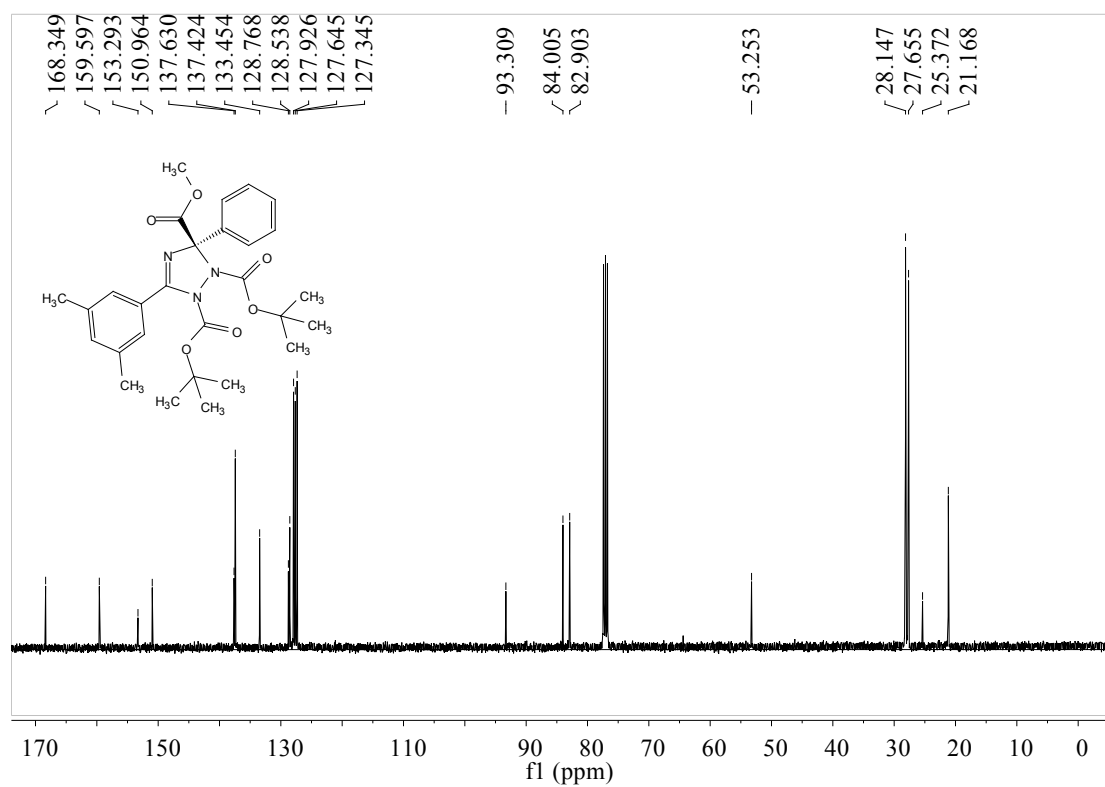

1,2-di-tert-butyl 3-methyl (R)-5-(4-bromophenyl)-3-phenyl-1H-1,2,4-triazole-1,2,3(3H)-tricarboxylate (**3fb**)

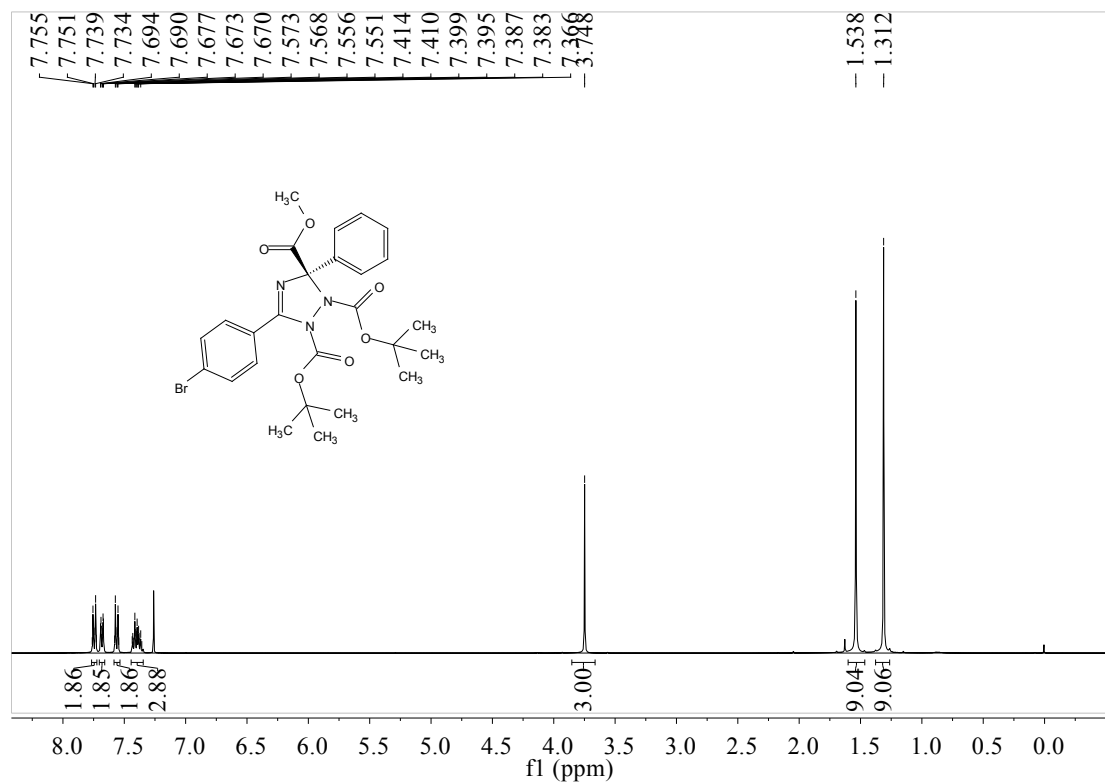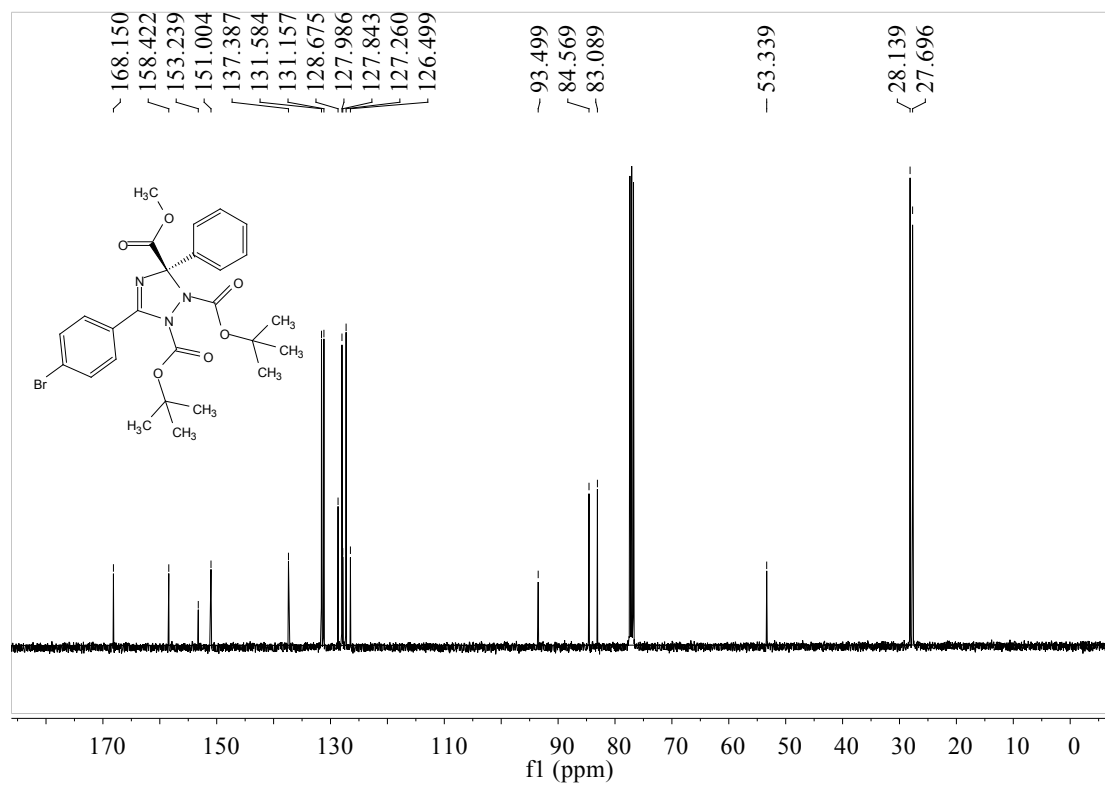

1,2-di-tert-butyl 3-methyl (R)-5-(4-fluorophenyl)-3-phenyl-1H-1,2,4-triazole-1,2,3(H)-tricarboxylate (**3gb**)

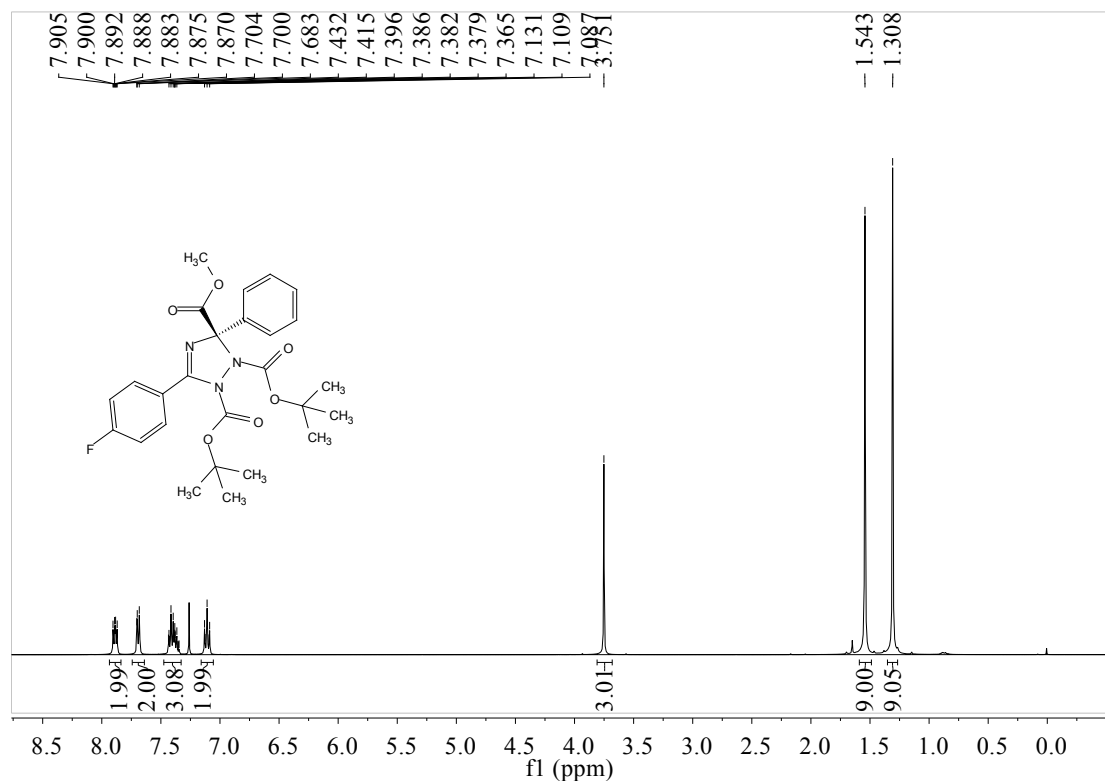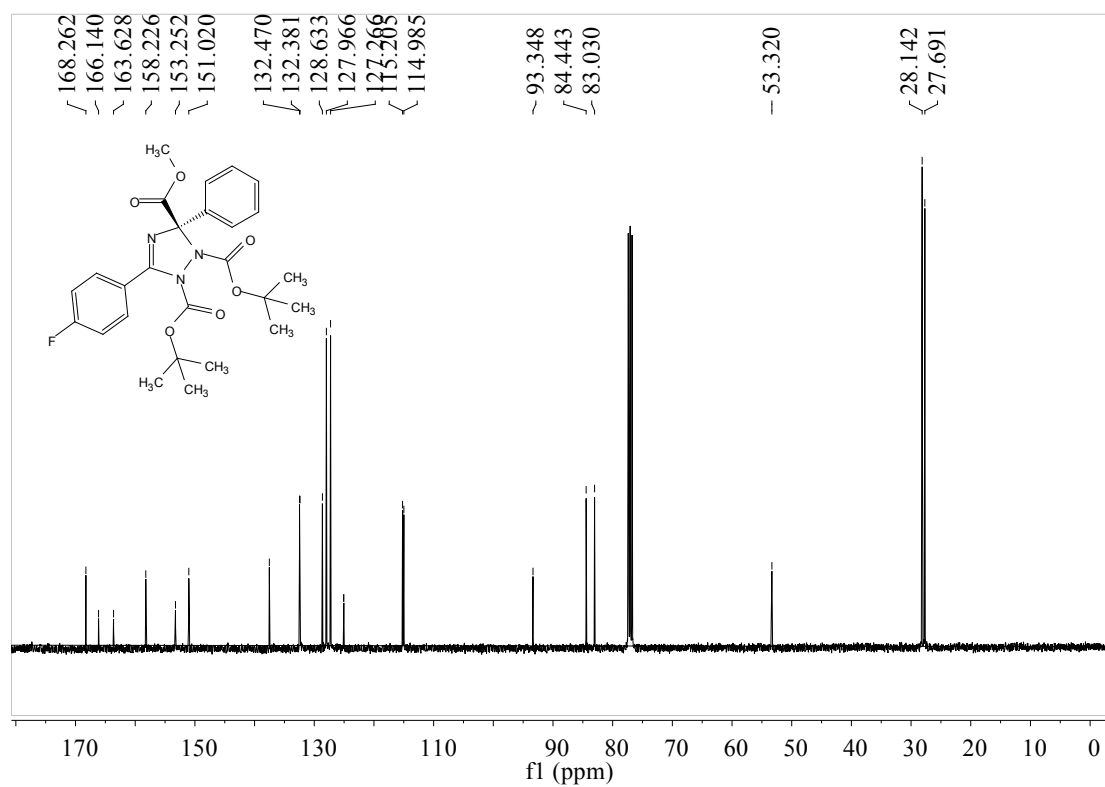



1,2-di-tert-butyl 3-methyl (R)-3,5-diphenyl-1H-1,2,4-triazole-1,2,3(3H)-tricarboxylate (**3hb**)

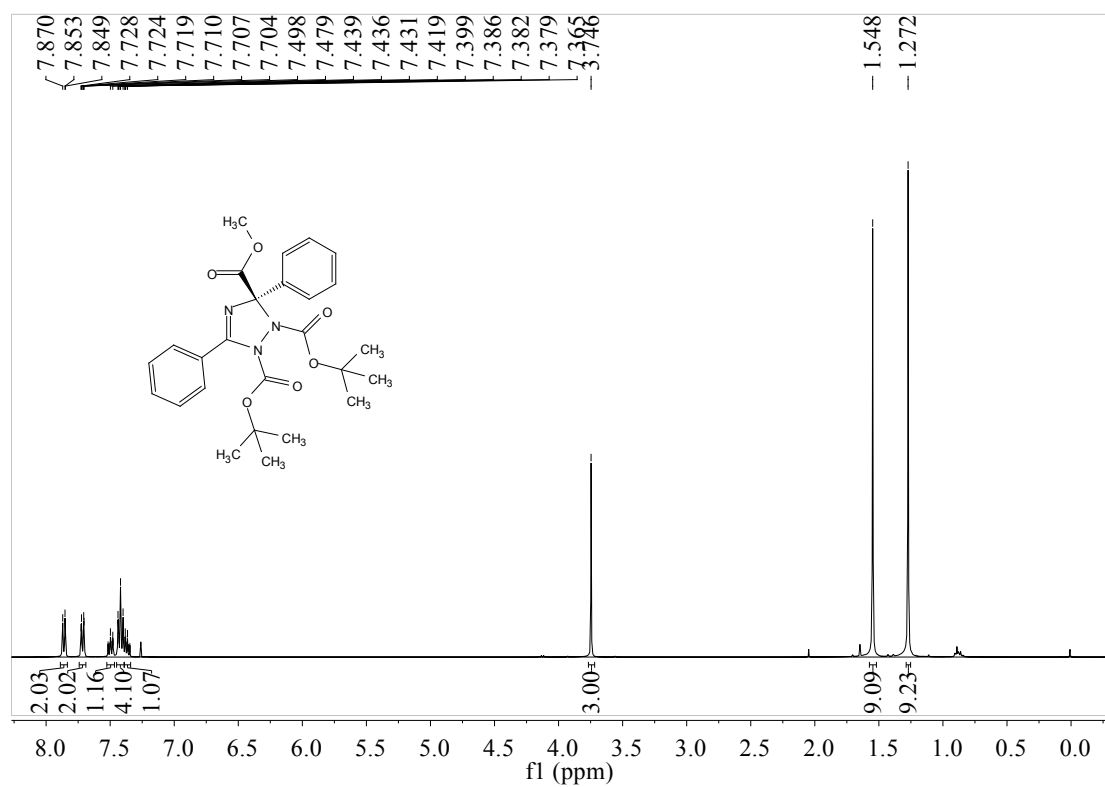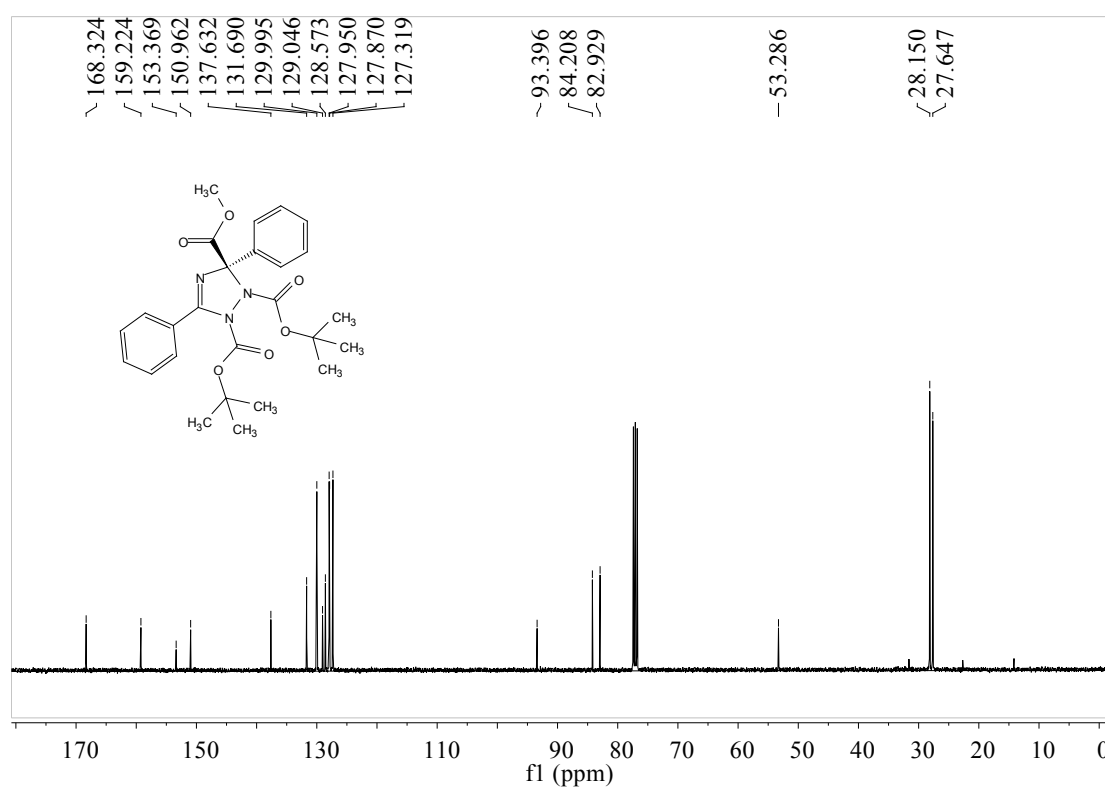

1,2-di-tert-butyl 3-methyl (R)-5-(naphthalen-2-yl)-3-phenyl-1H-1,2,4-triazole-1,2,3(H)-tricarboxylate (**3ib**)

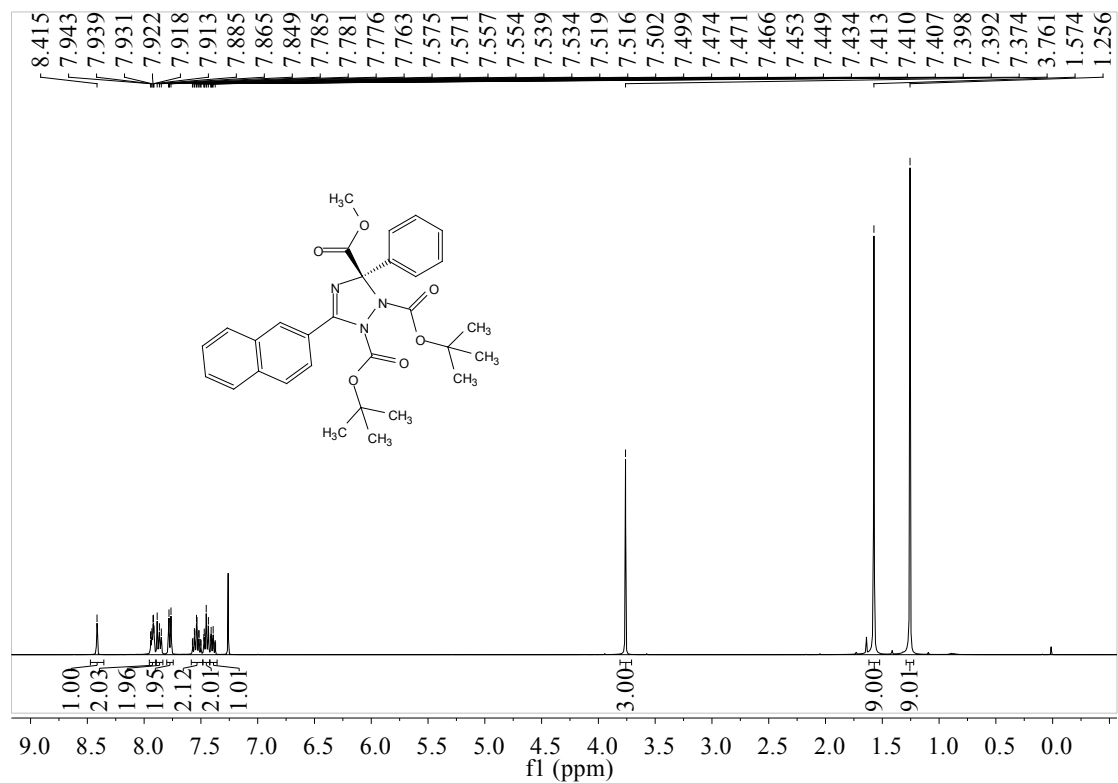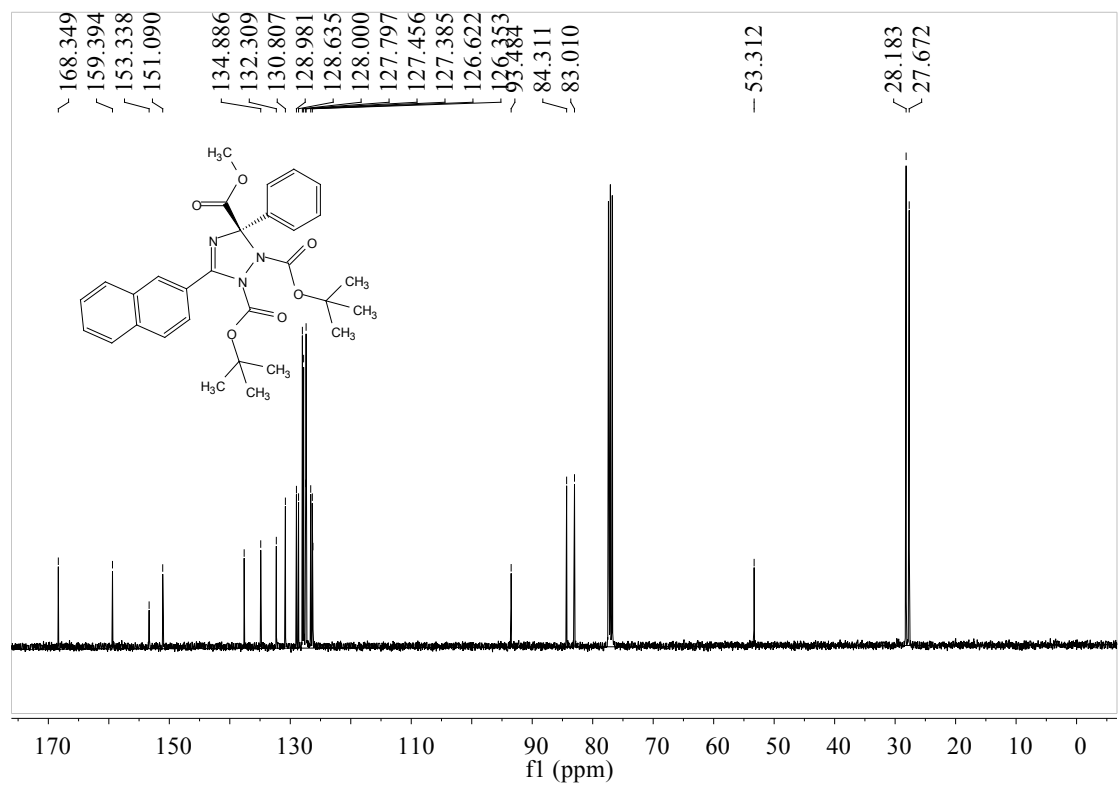

1,2-di-tert-butyl 3-methyl (R)-5-(furan-2-yl)-3-phenyl-1H-1,2,4-triazole-1,2,3(3H)-tricarboxylate  
(3jb)

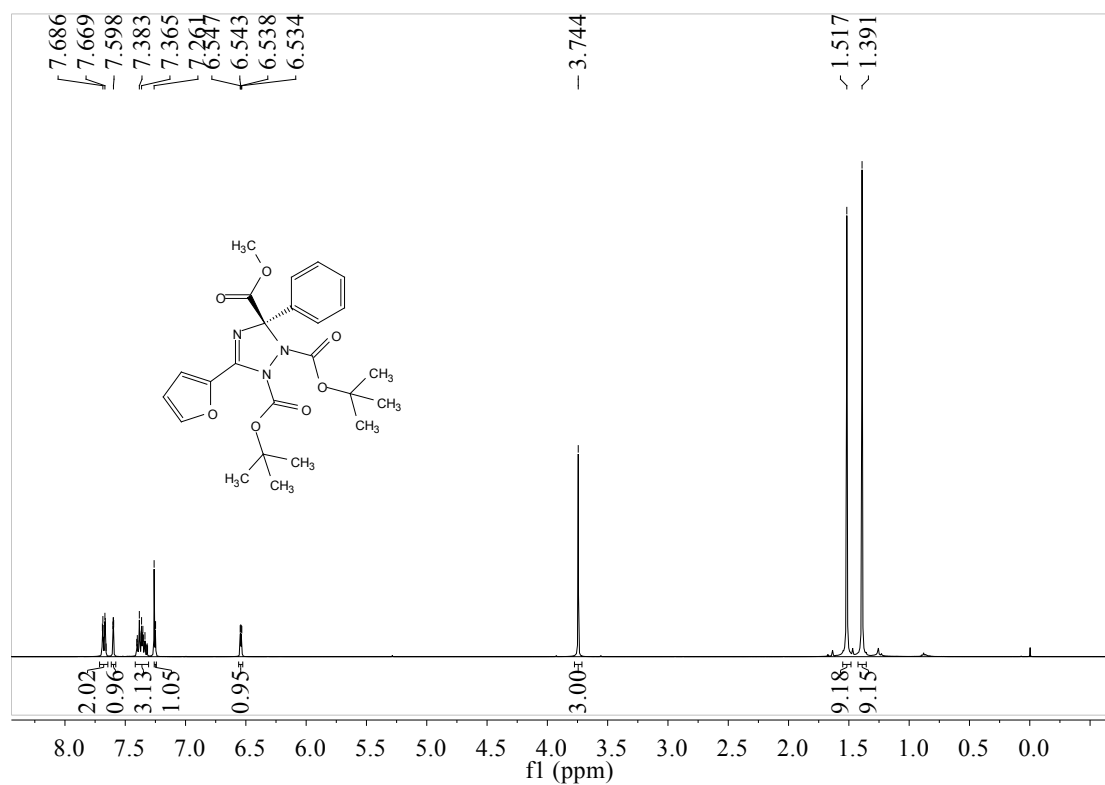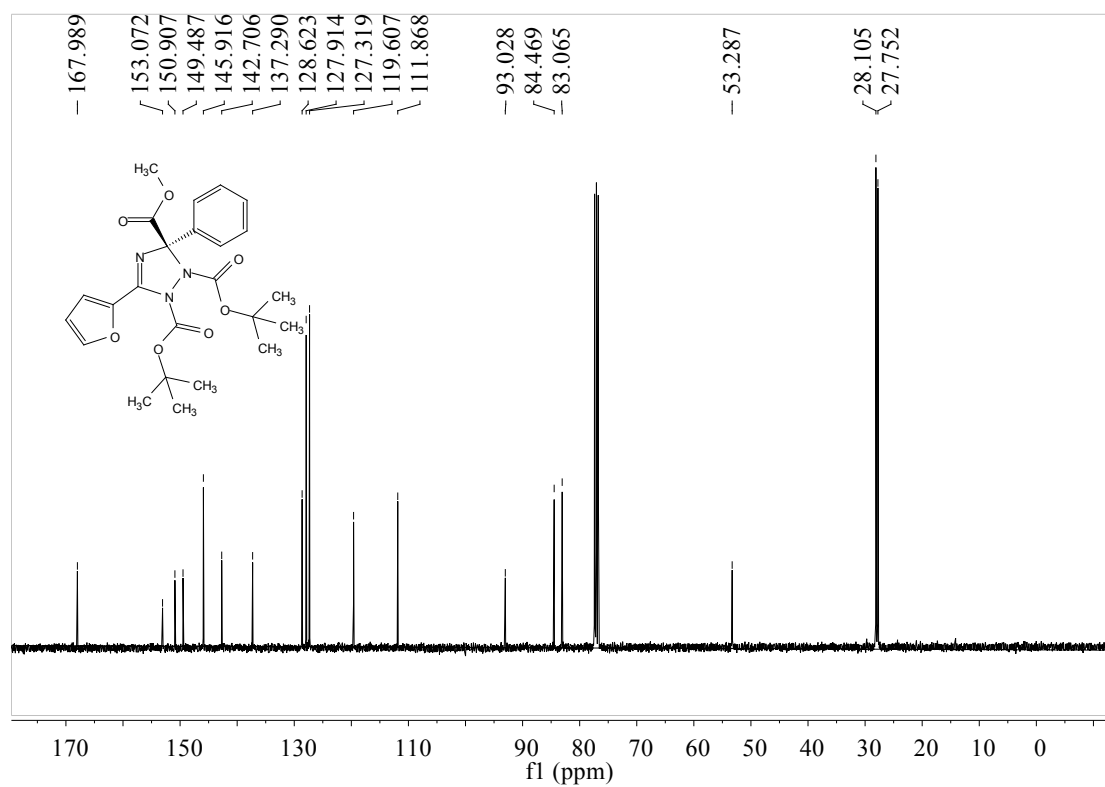

1,2-di-tert-butyl 3-methyl (R)-3-phenyl-5-(thiophen-2-yl)-1H-1,2,4-triazole-1,2,3(H)-tricarboxylate (**3kb**)

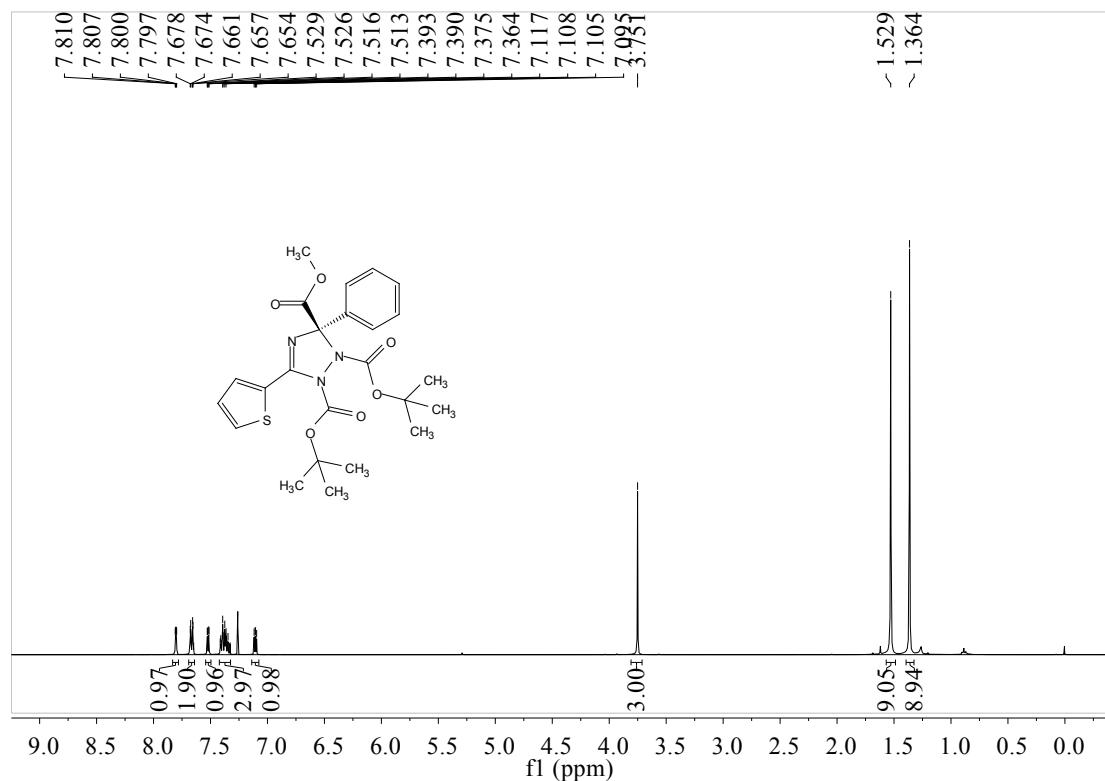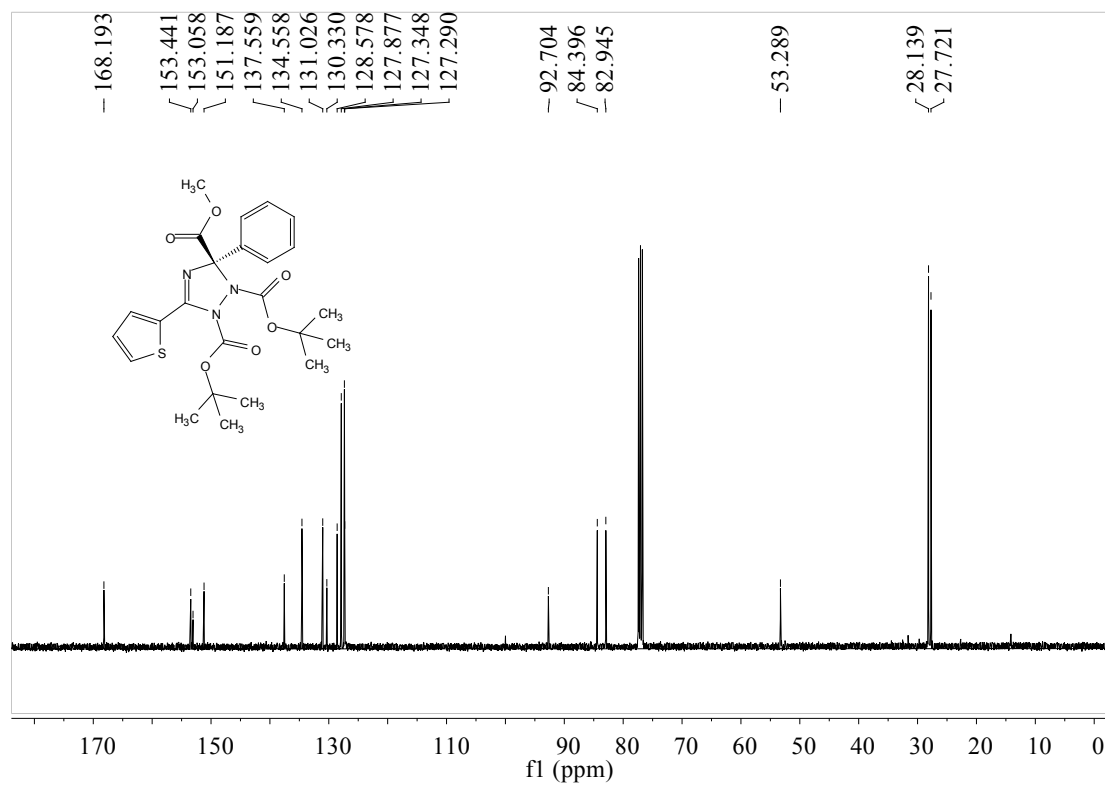

1,2-di-tert-butyl 3-methyl (R)-5-methyl-3-phenyl-1H-1,2,4-triazole-1,2,3(H)-tricarboxylate (**31b**)

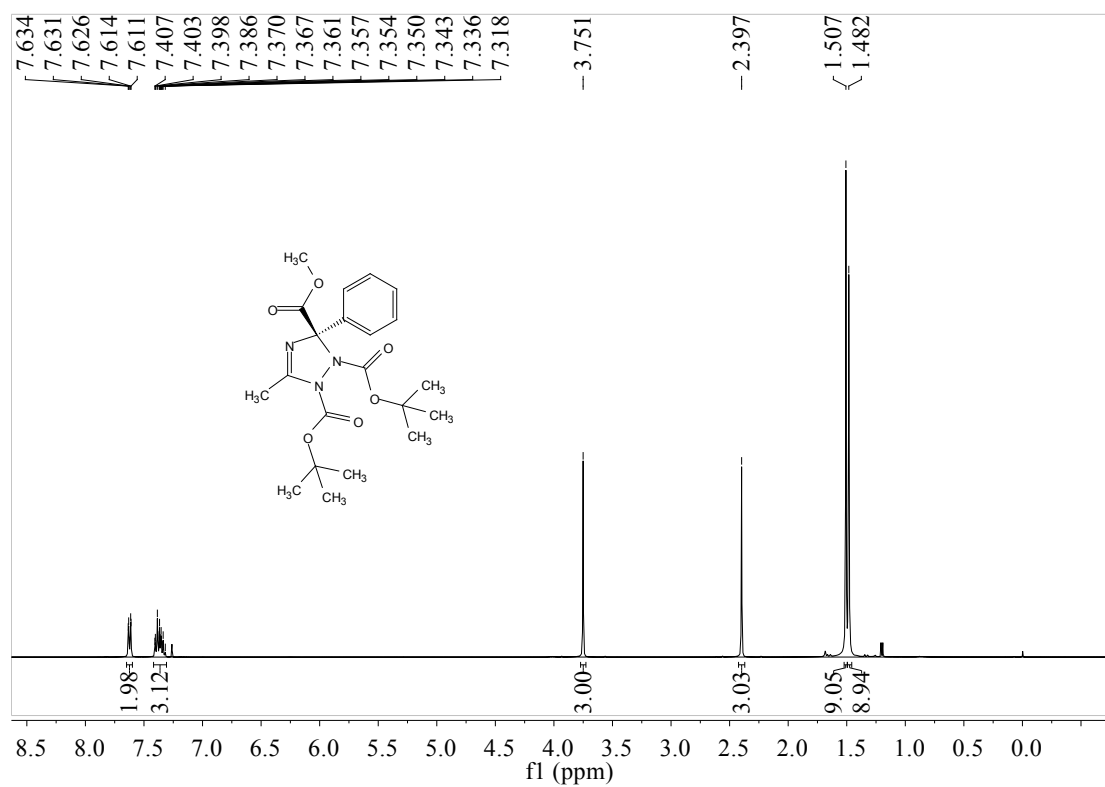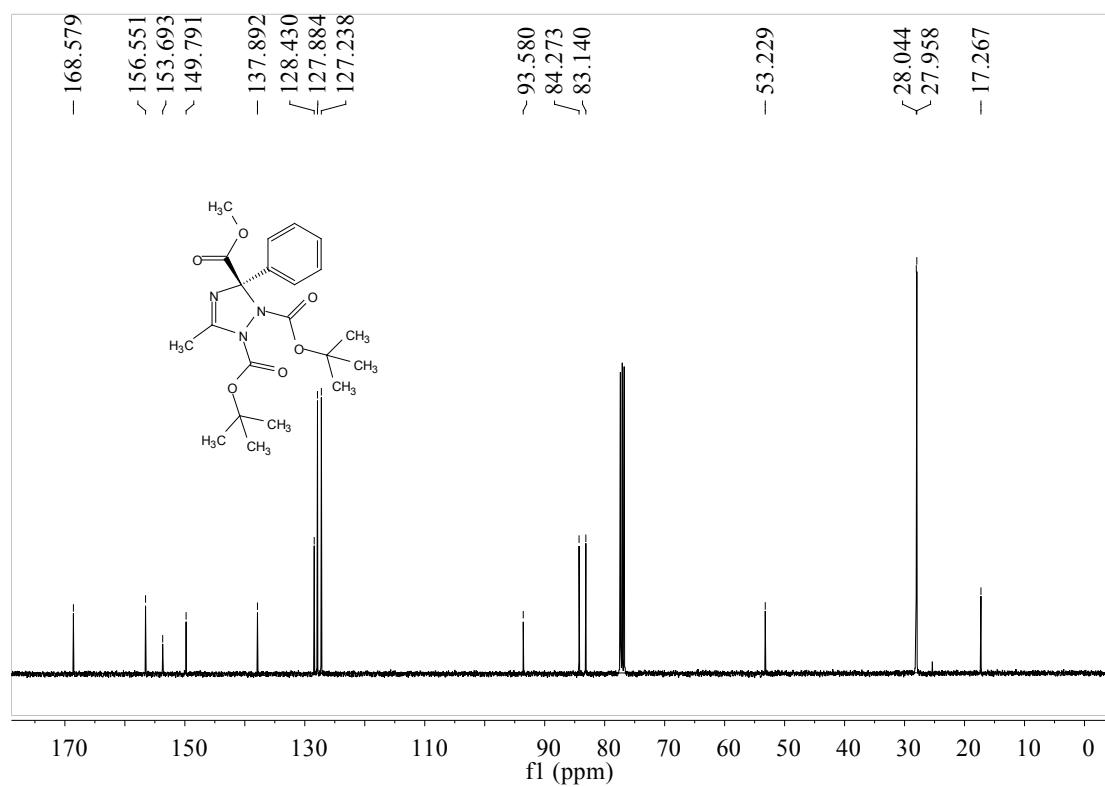

1,2-di-tert-butyl 3-methyl (R)-5-pentyl-3-phenyl-1H-1,2,4-triazole-1,2,3(3H)-tricarboxylate (**3mb**)

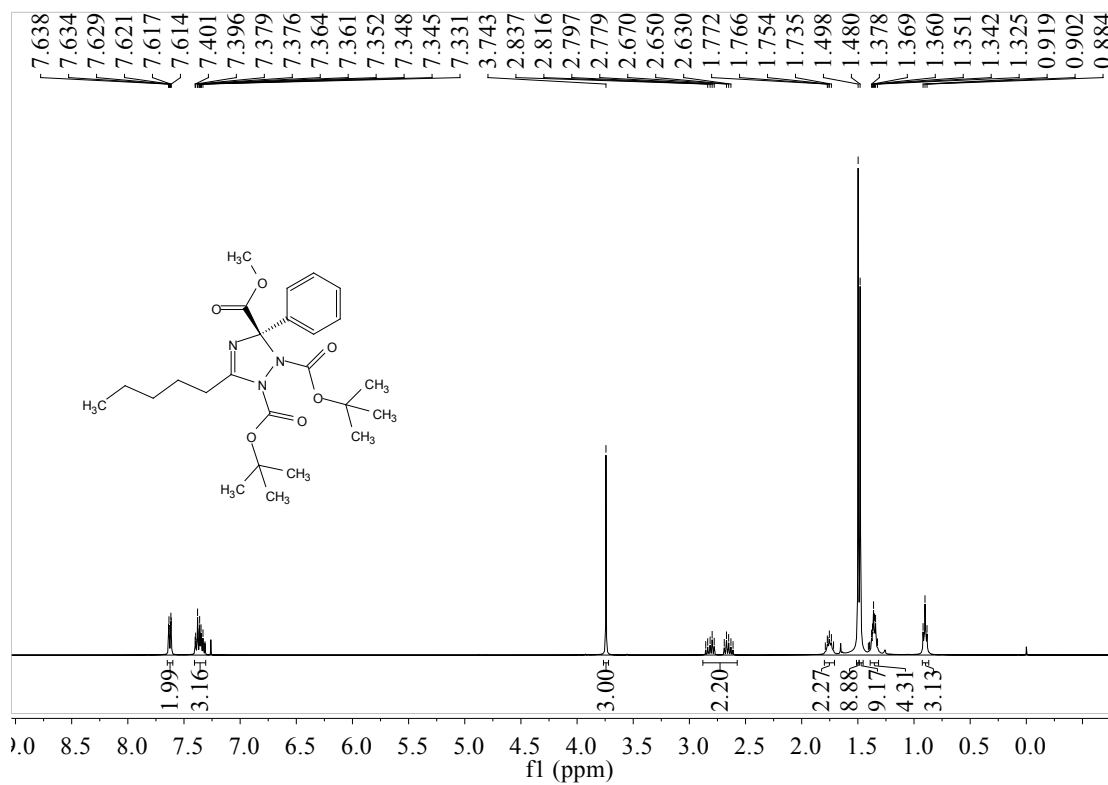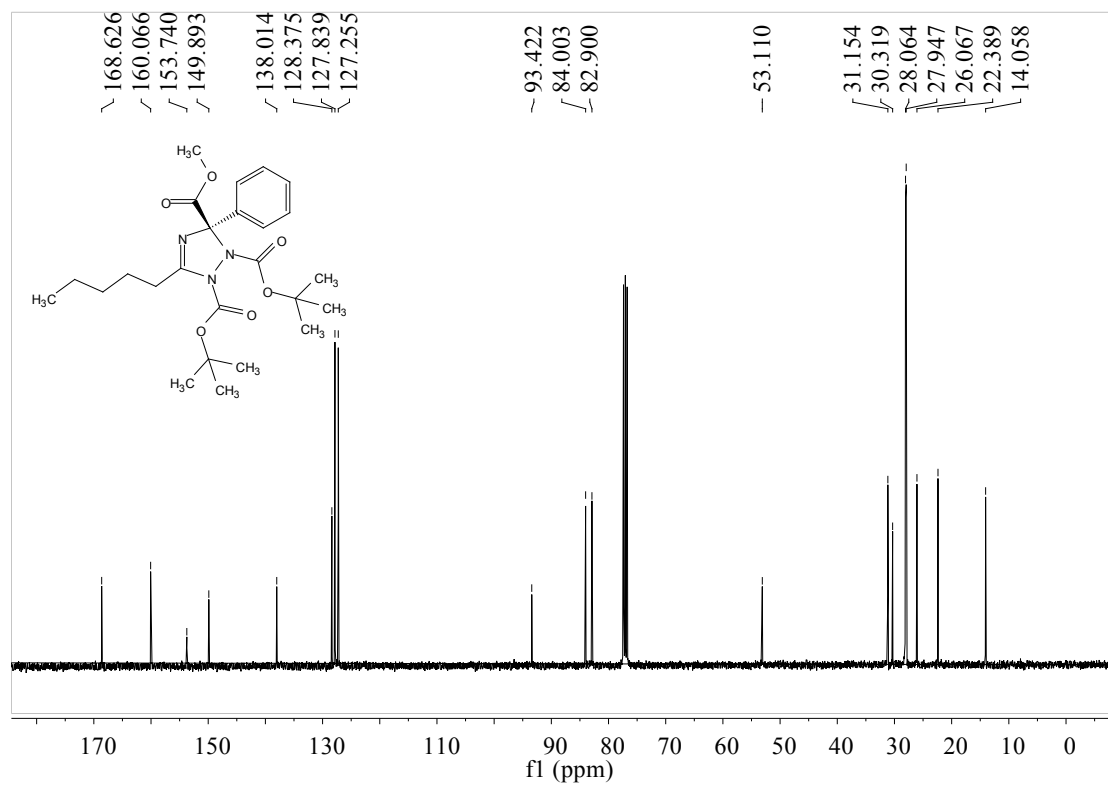

1,2-di-tert-butyl 3-methyl (R)-5-(4-methoxyphenyl)-1H-1,2,4-triazole-1,2,3(3H)-tricarboxylate  
**(3nb)**

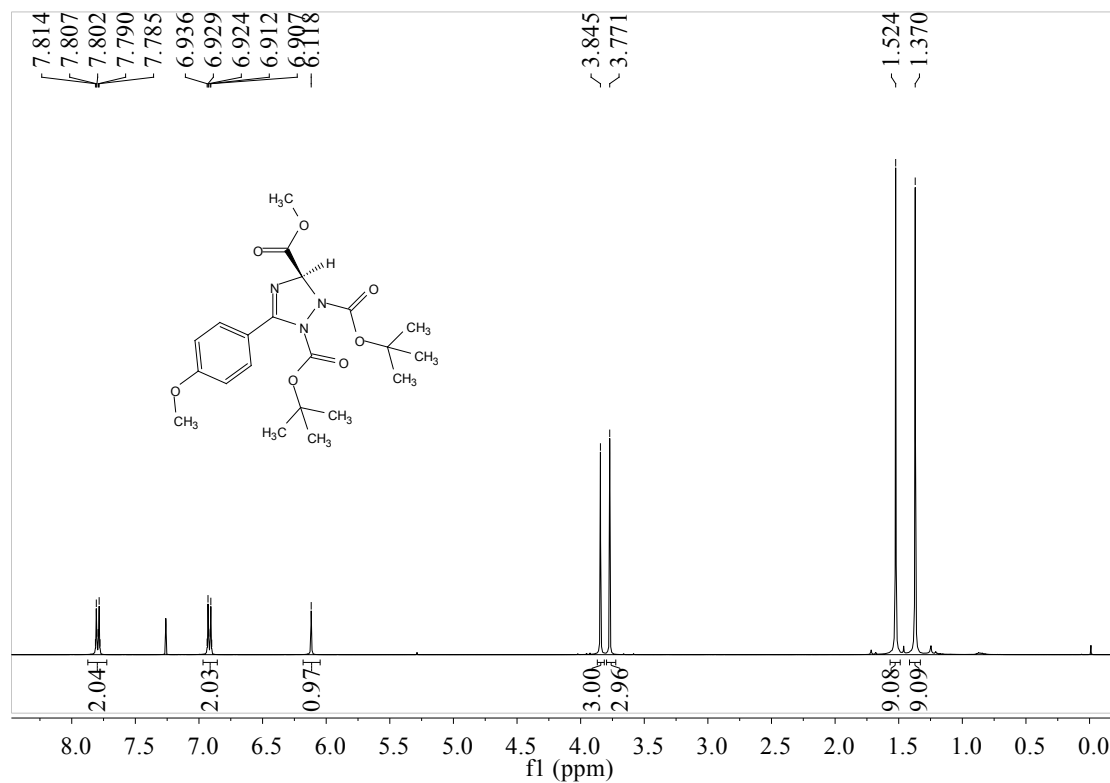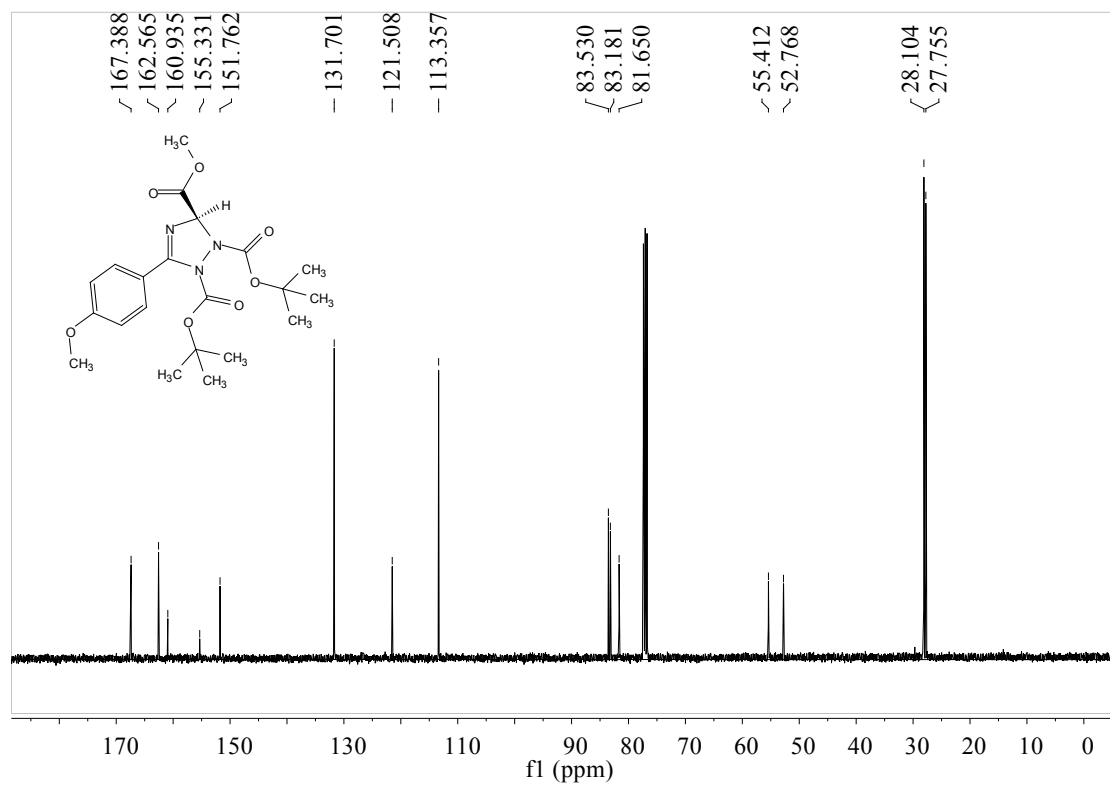

1,2-di-tert-butyl 3-methyl (R)-5-(4-methoxyphenyl)-3-methyl-1H-1,2,4-triazole-1,2,3(H)-tricarboxylate (**3ob**)

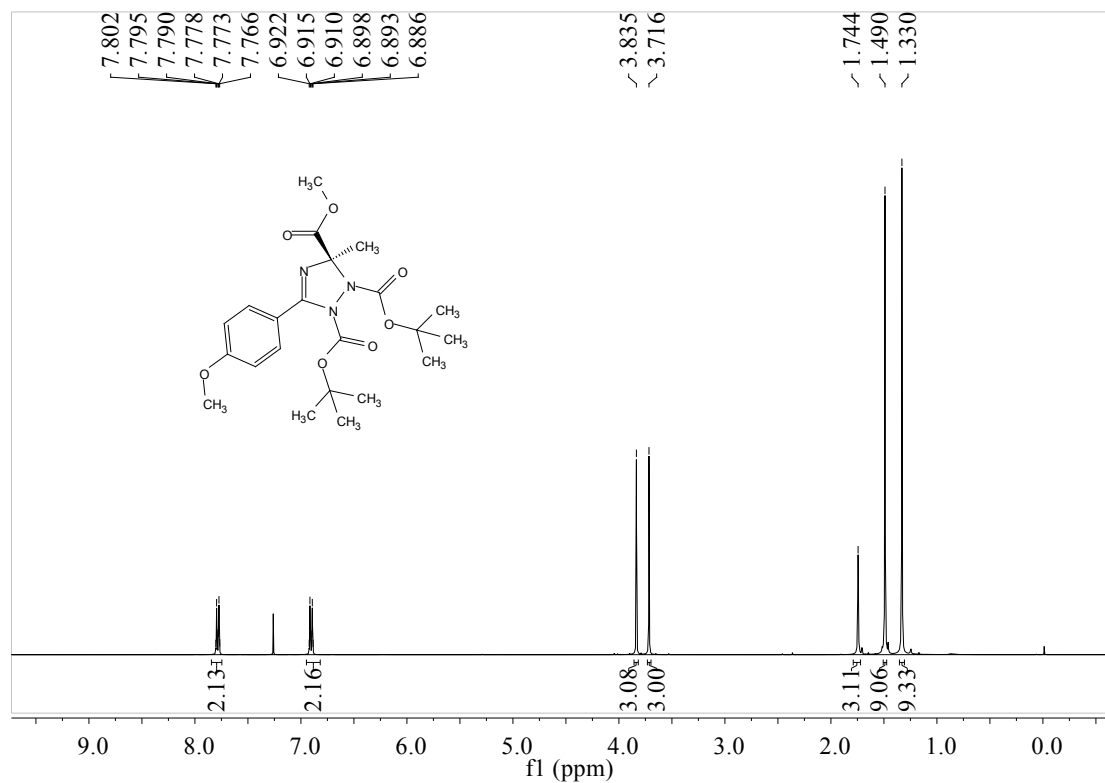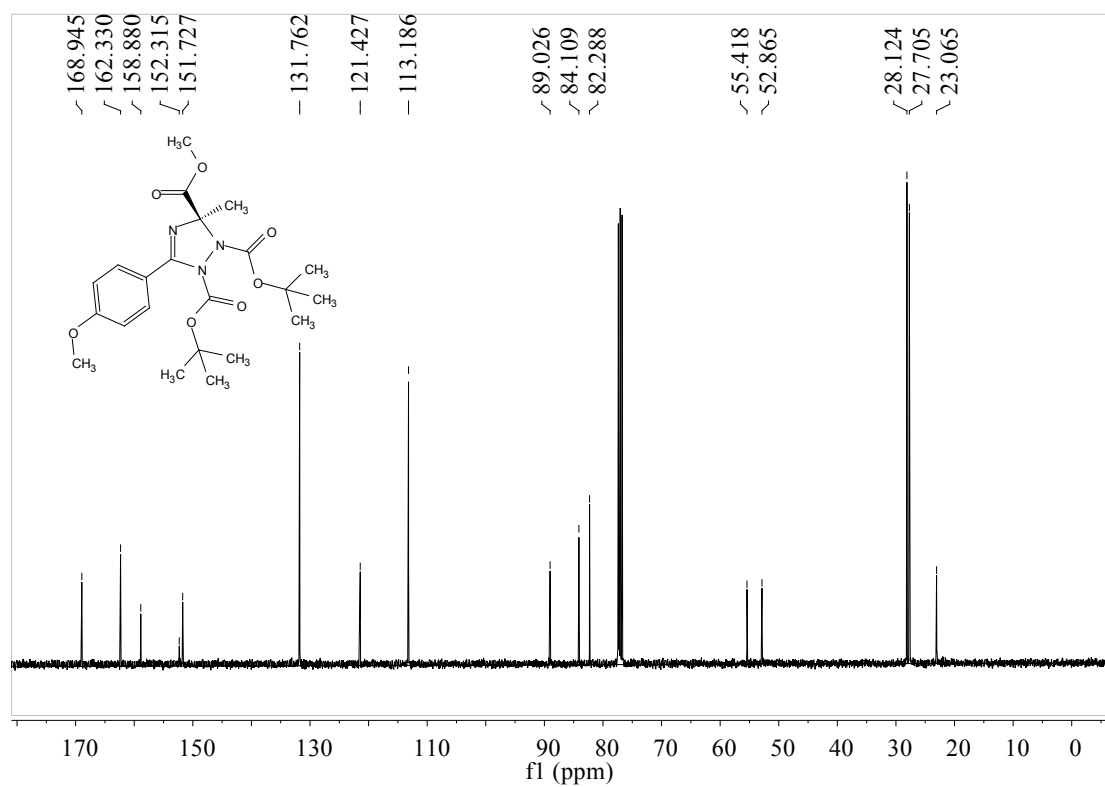



1,2-di-tert-butyl 3-methyl (R)-3-ethyl-5-(4-methoxyphenyl)-1H-1,2,4-triazole-1,2,3(3H)-tricarboxylate (**3pb**)

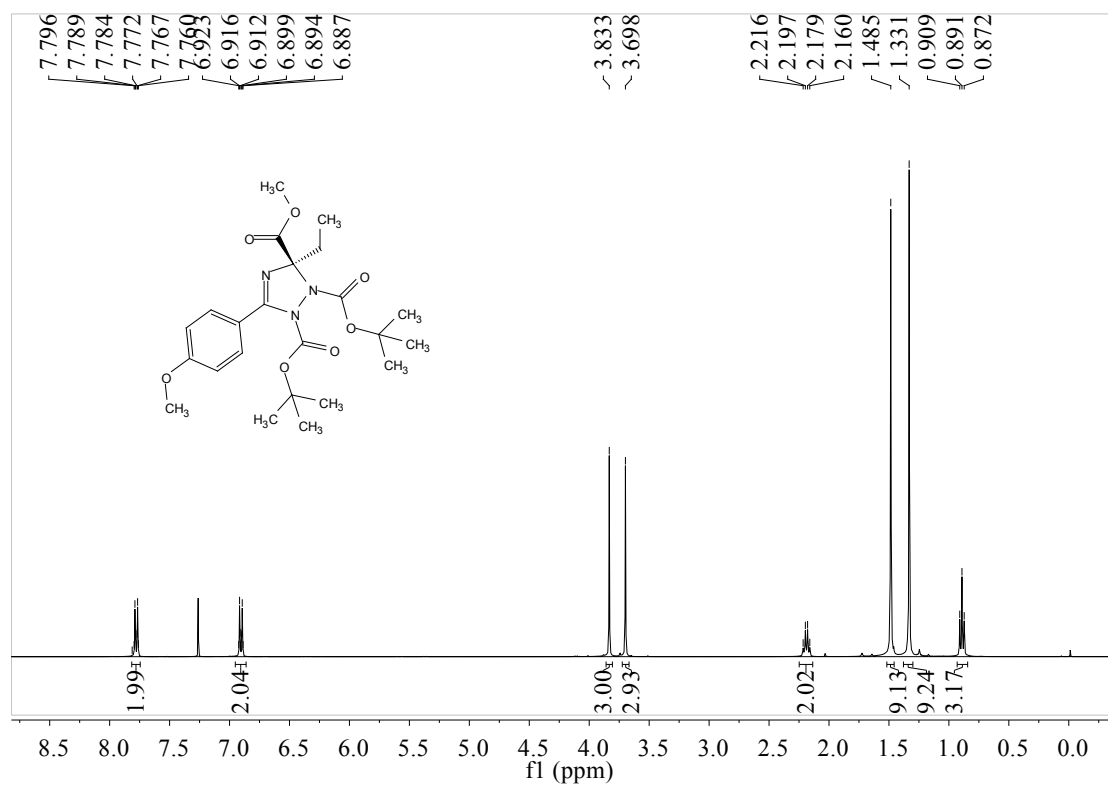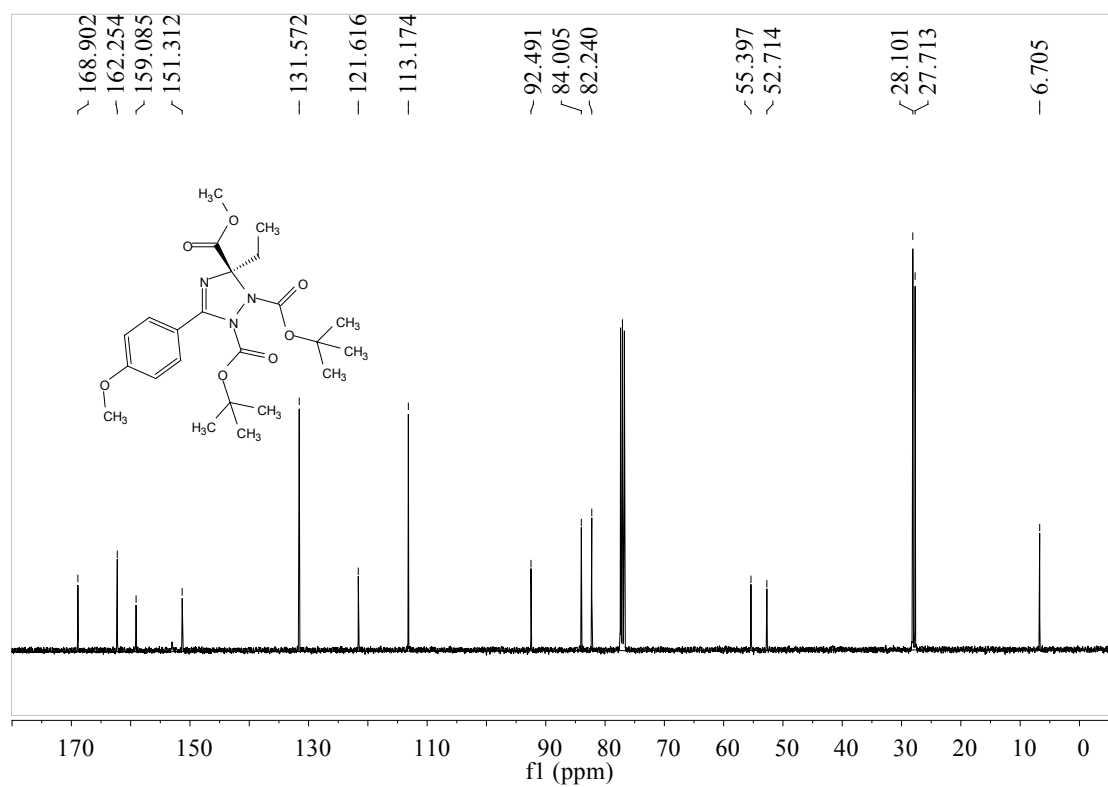

1,2-di-tert-butyl 3-methyl (R)-3-isopropyl-5-(4-methoxyphenyl)-1H-1,2,4-triazole-1,2,3(H)-tricarboxylate (**3qb**)

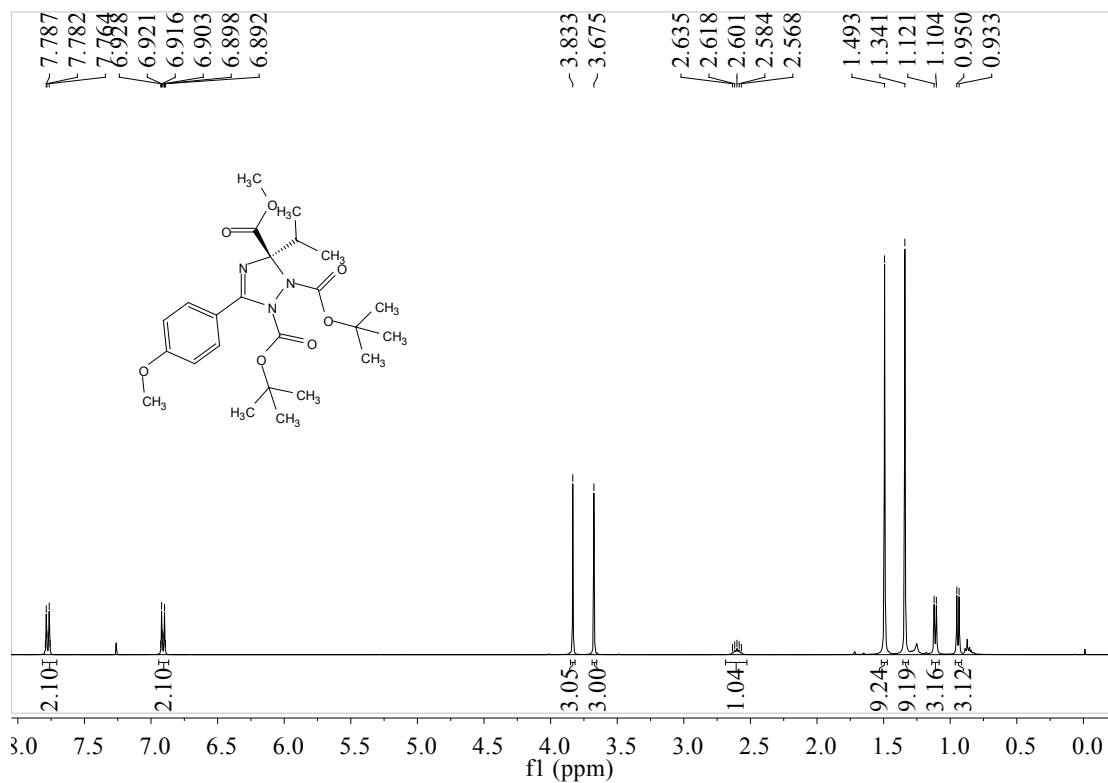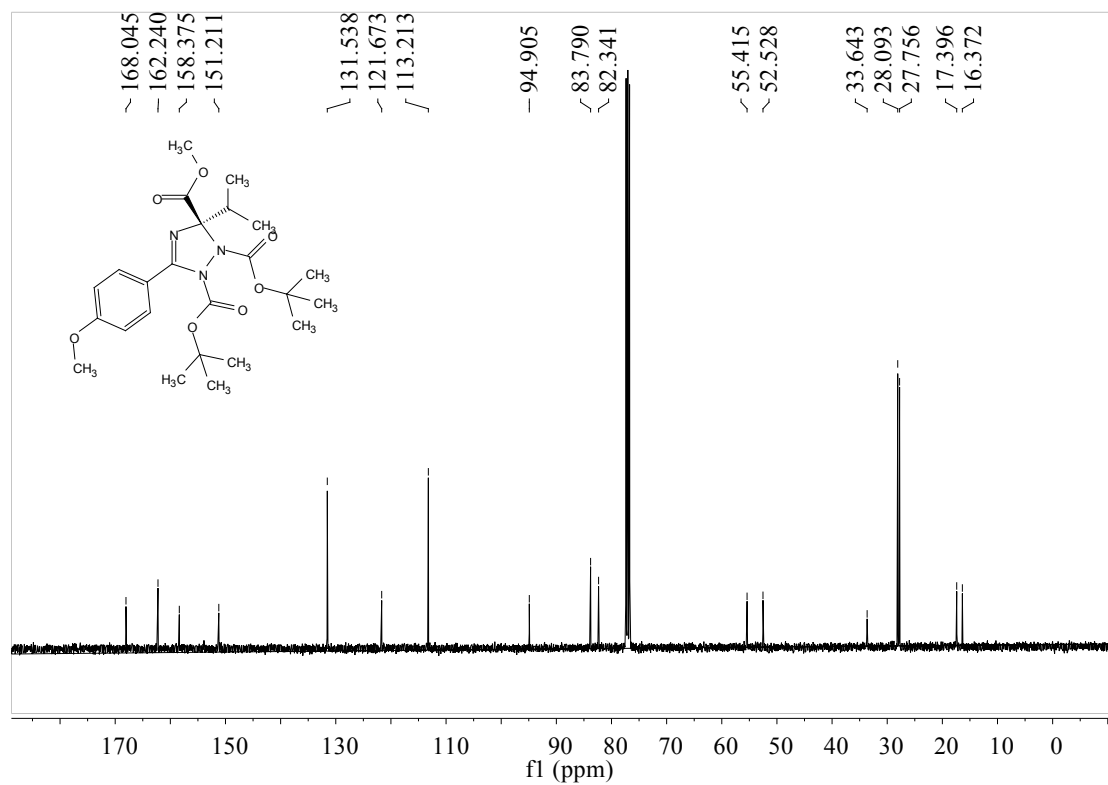

1,2-di-tert-butyl 3-methyl (R)-3-(4-fluorophenyl)-5-phenyl-1H-1,2,4-triazole-1,2,3(3H)-tricarboxylate (**3rb**)

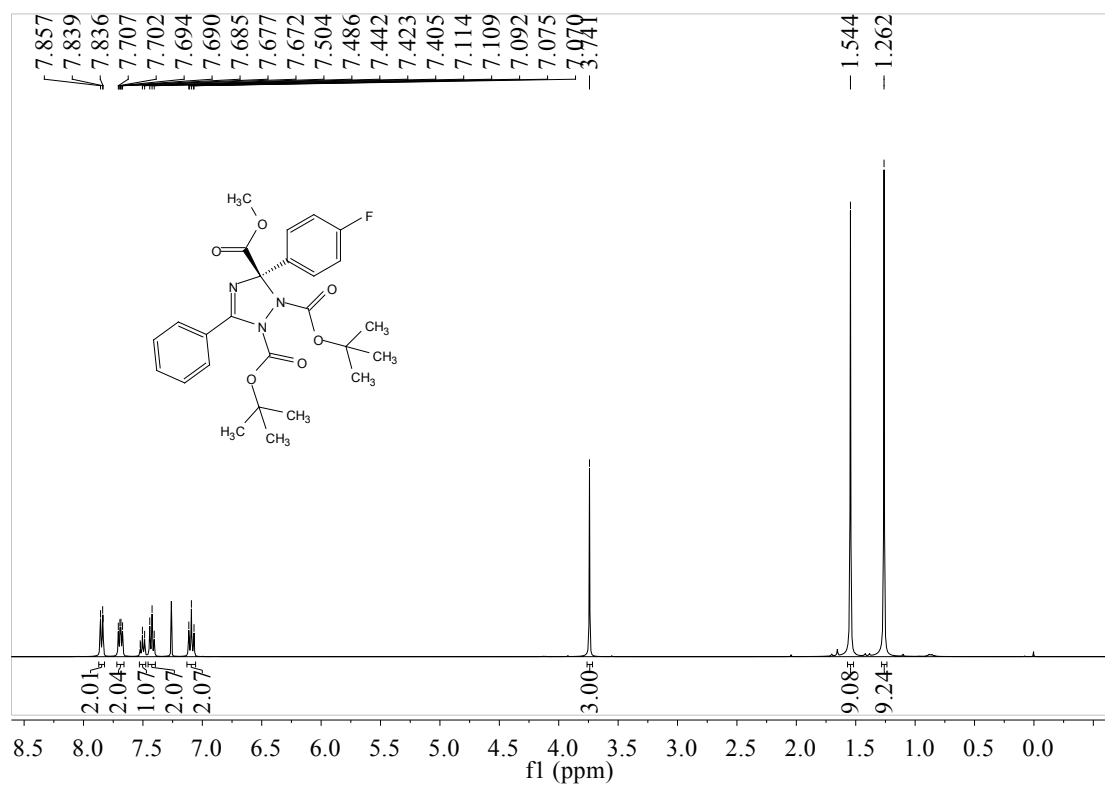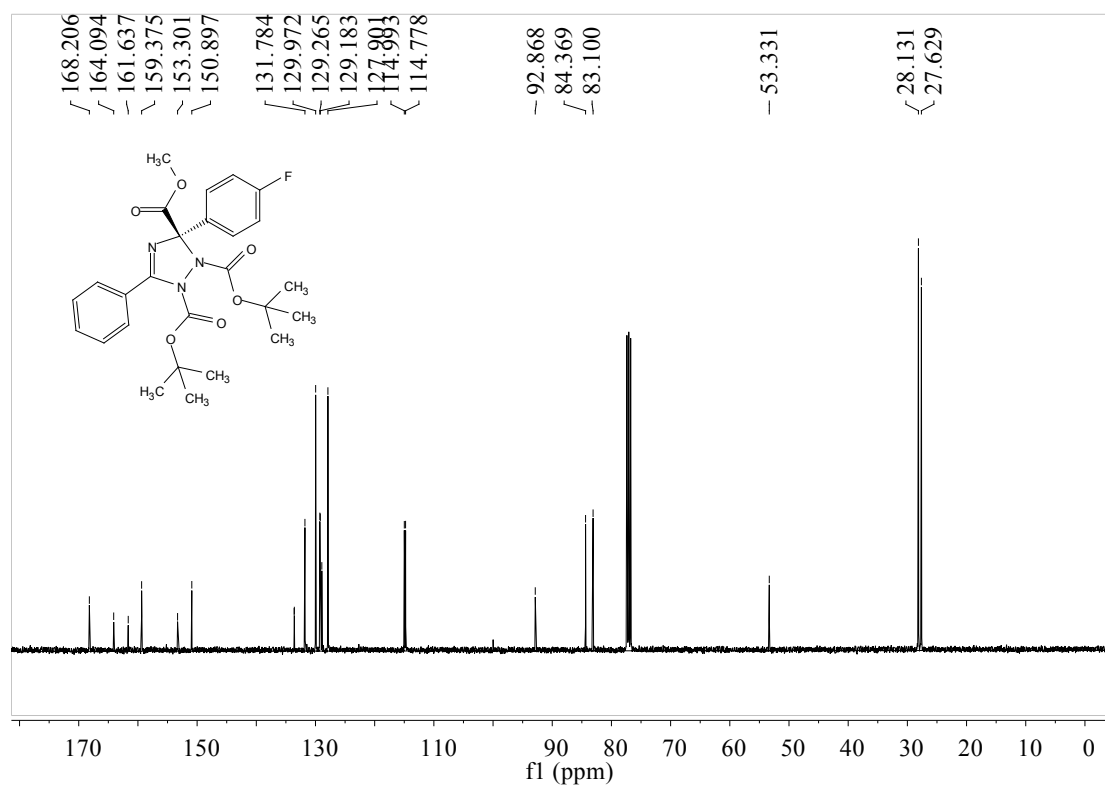

1,2-di-tert-butyl 3-methyl (R)-3-(4-bromophenyl)-5-phenyl-1H-1,2,4-triazole-1,2,3(H)-tricarboxylate (**3sb**)

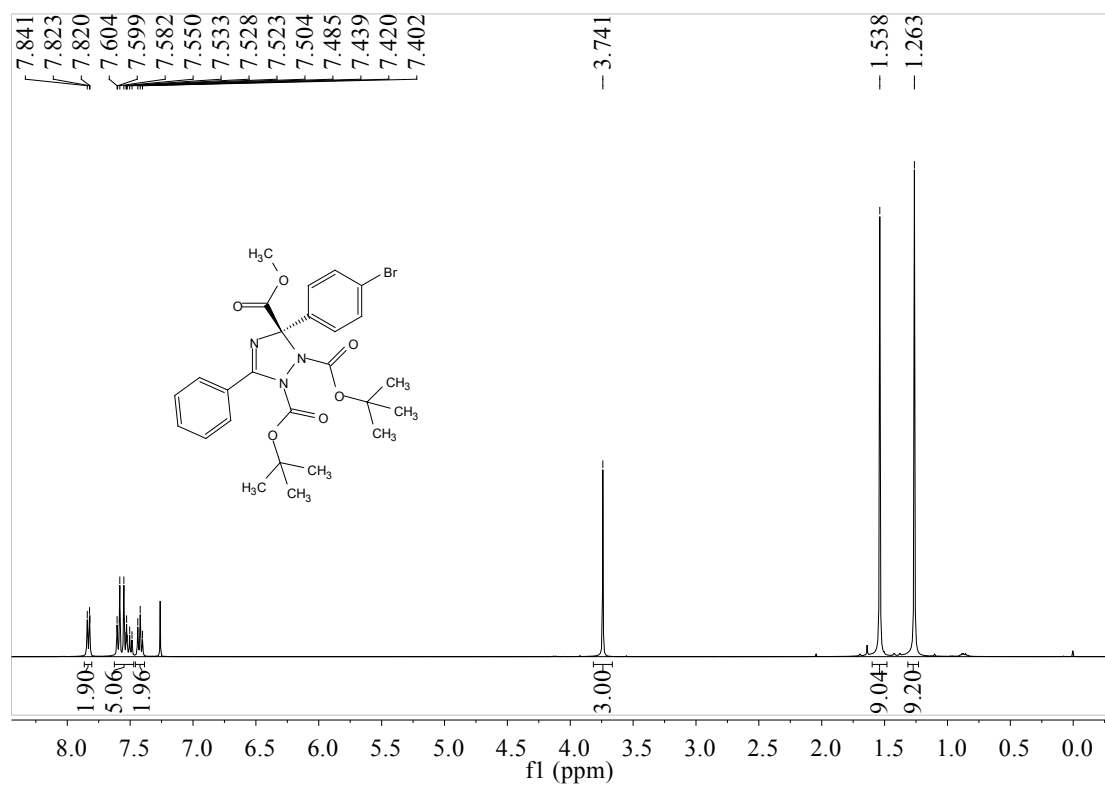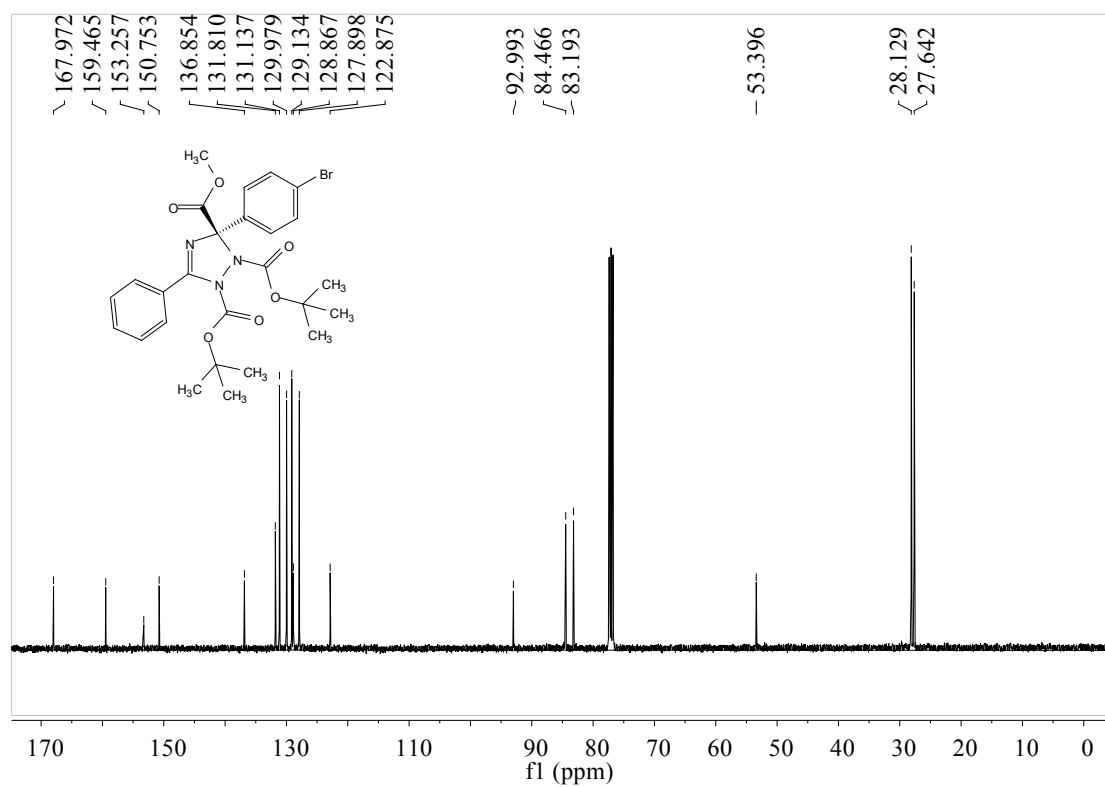

1,2-di-tert-butyl 3-methyl (R)-3-(4-chlorophenyl)-5-phenyl-1H-1,2,4-triazole-1,2,3(3H)-tricarboxylate (**3tb**)

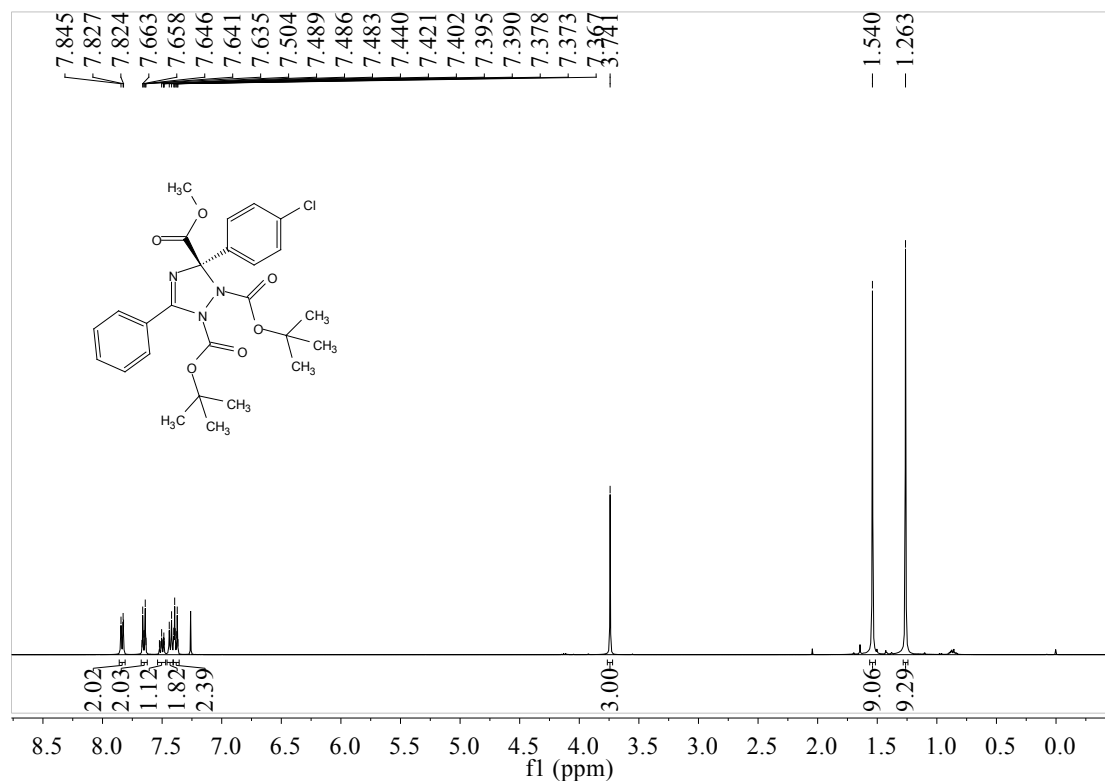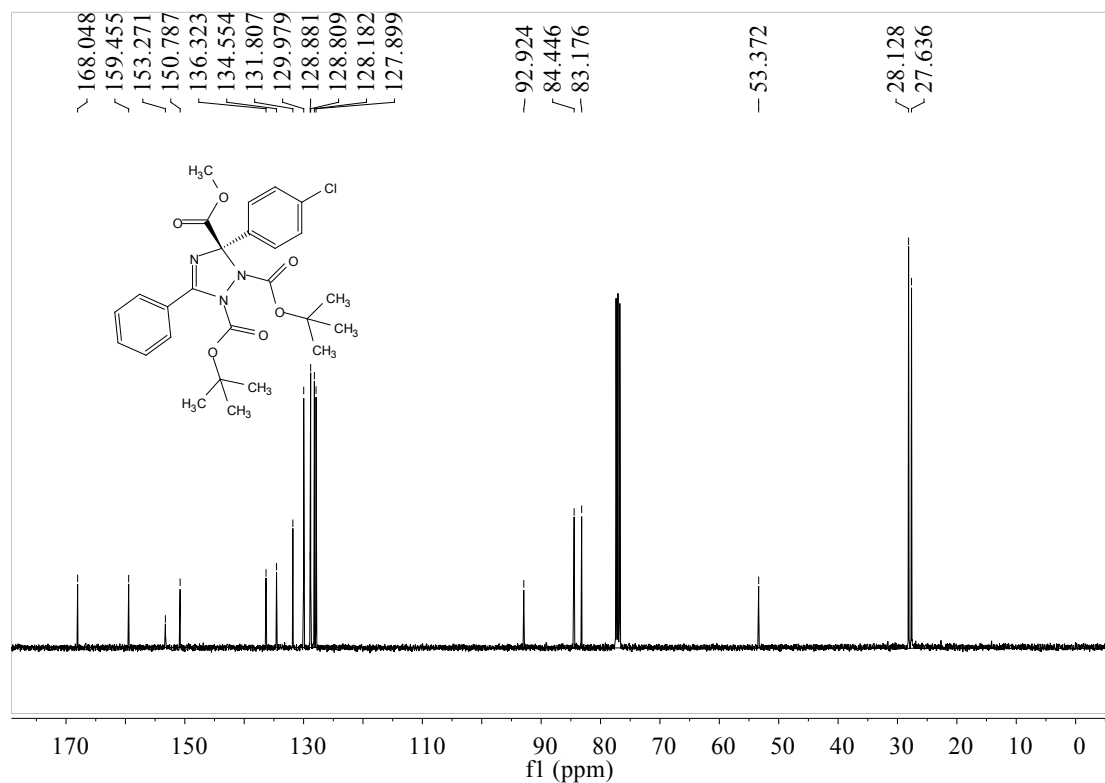

1,2-di-tert-butyl 3-methyl (R)-3-(4-methoxyphenyl)-5-phenyl-1H-1,2,4-triazole-1,2,3(H)-tricarboxylate (**3ub**)

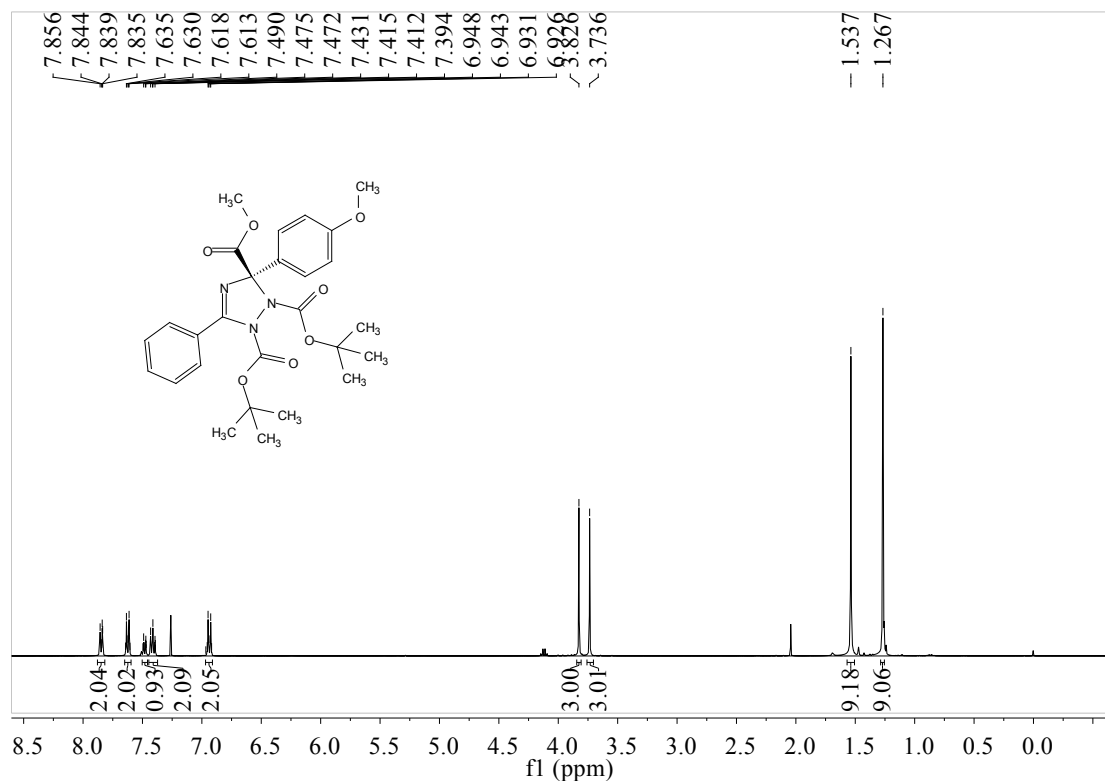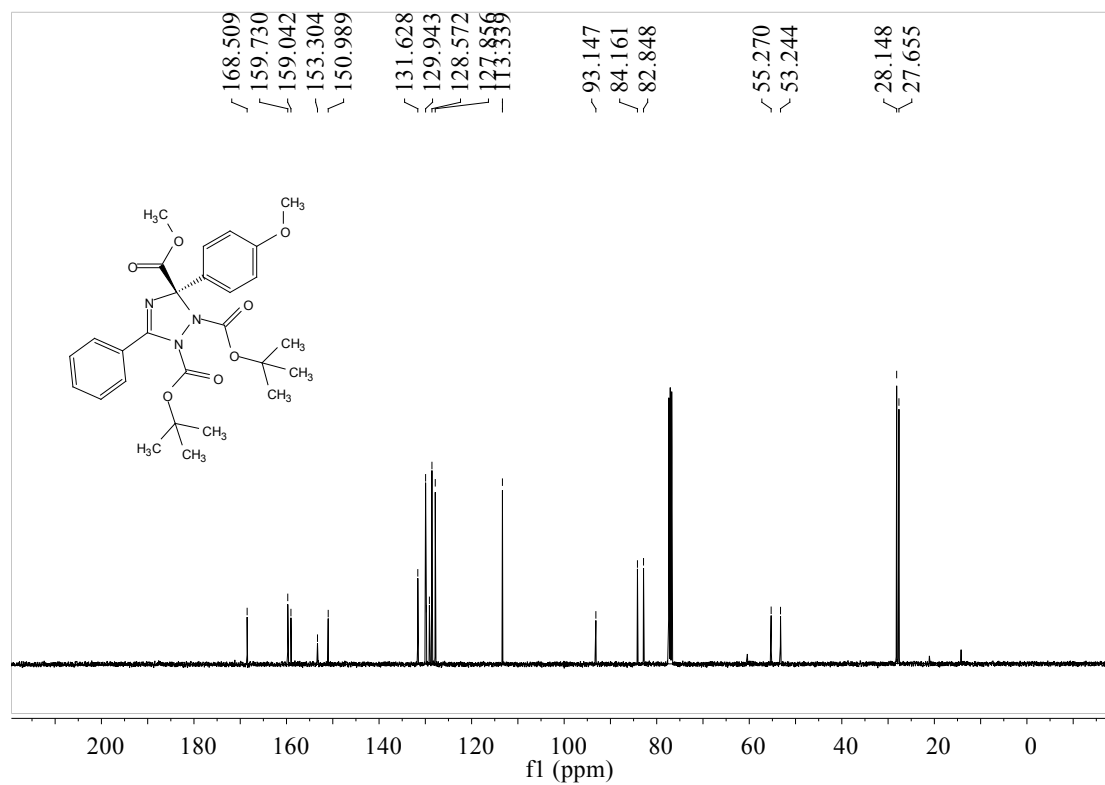

1,2-di-tert-butyl 3-methyl (R)-5-phenyl-3-(p-tolyl)-1H-1,2,4-triazole-1,2,3(3H)-tricarboxylate  
**(3vb)**

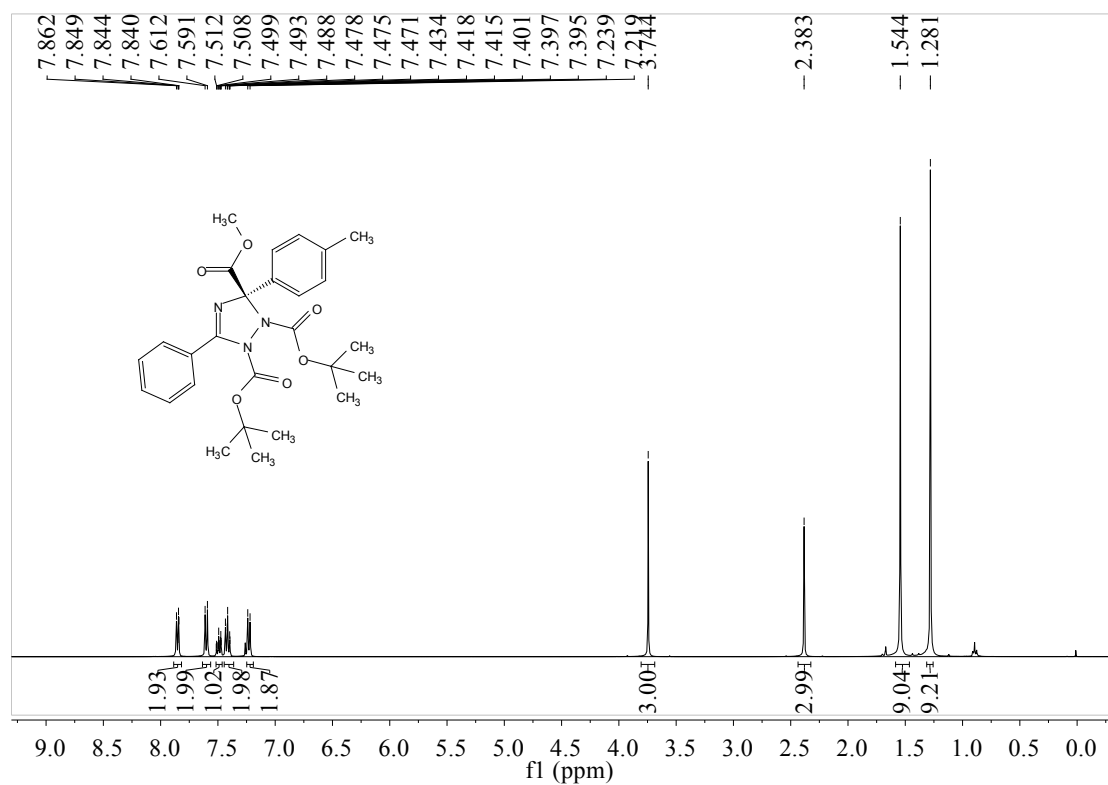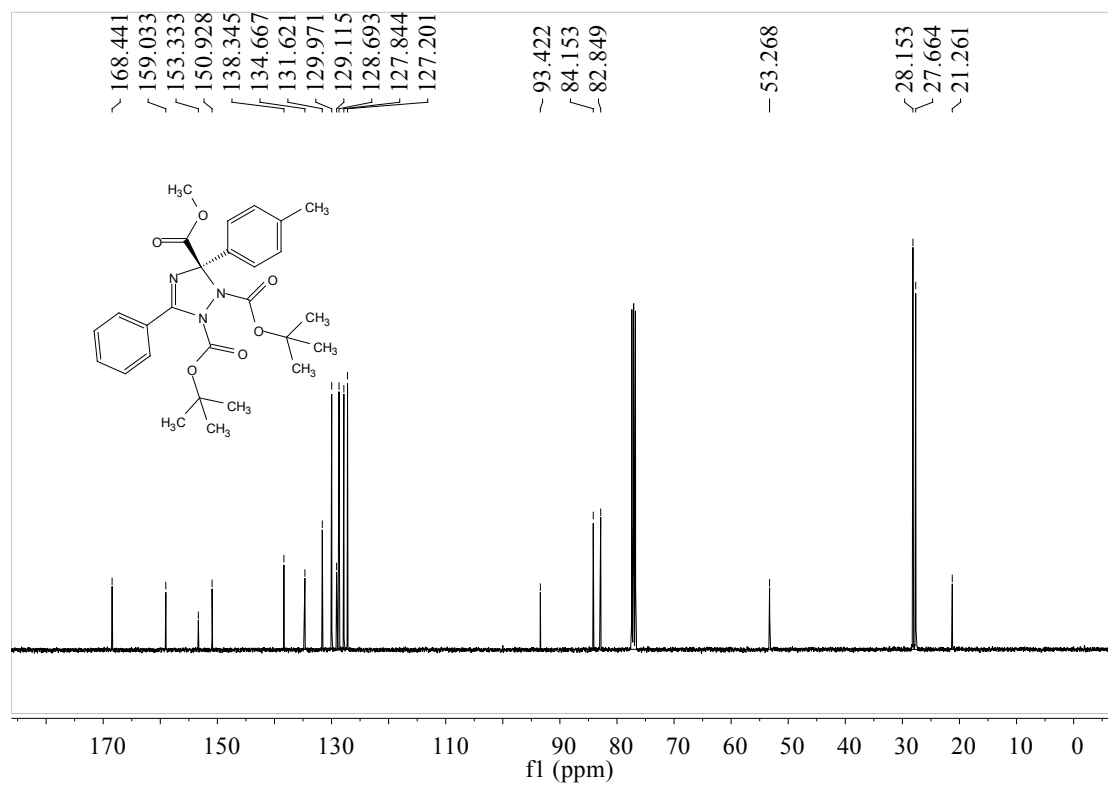

1,2-di-tert-butyl 3-methyl (R)-3-(3-chlorophenyl)-5-phenyl-1H-1,2,4-triazole-1,2,3(H)-  
ntricarboxylate (**3wb**)

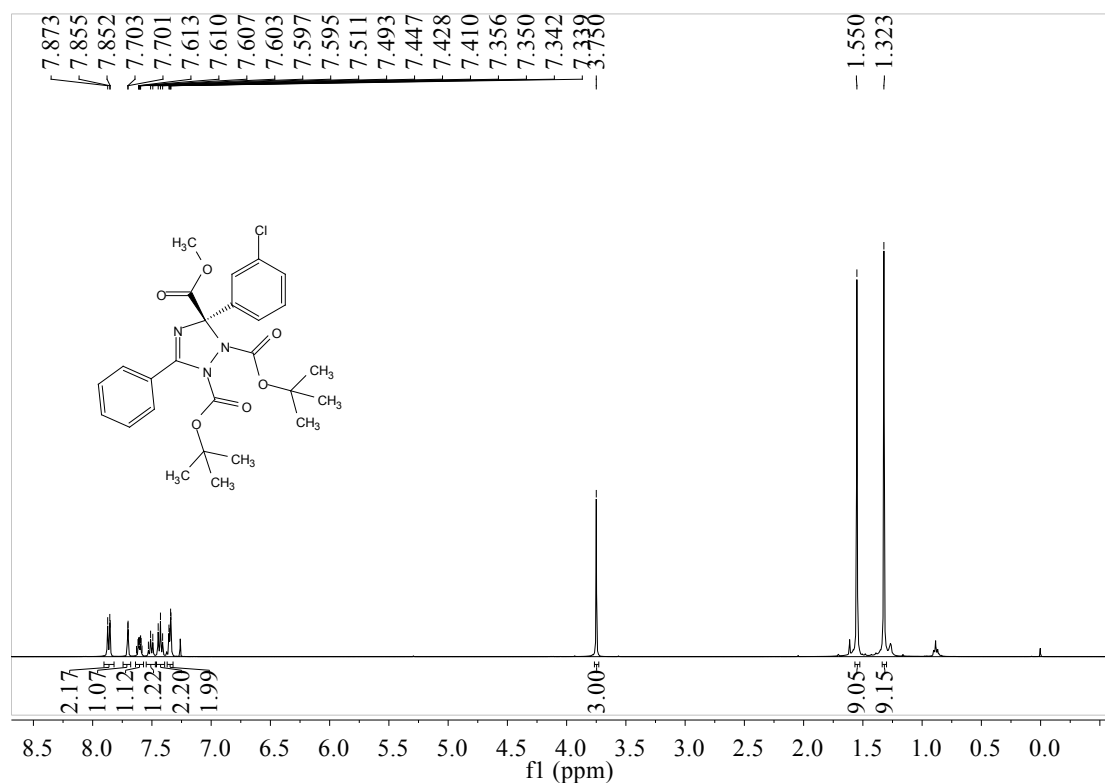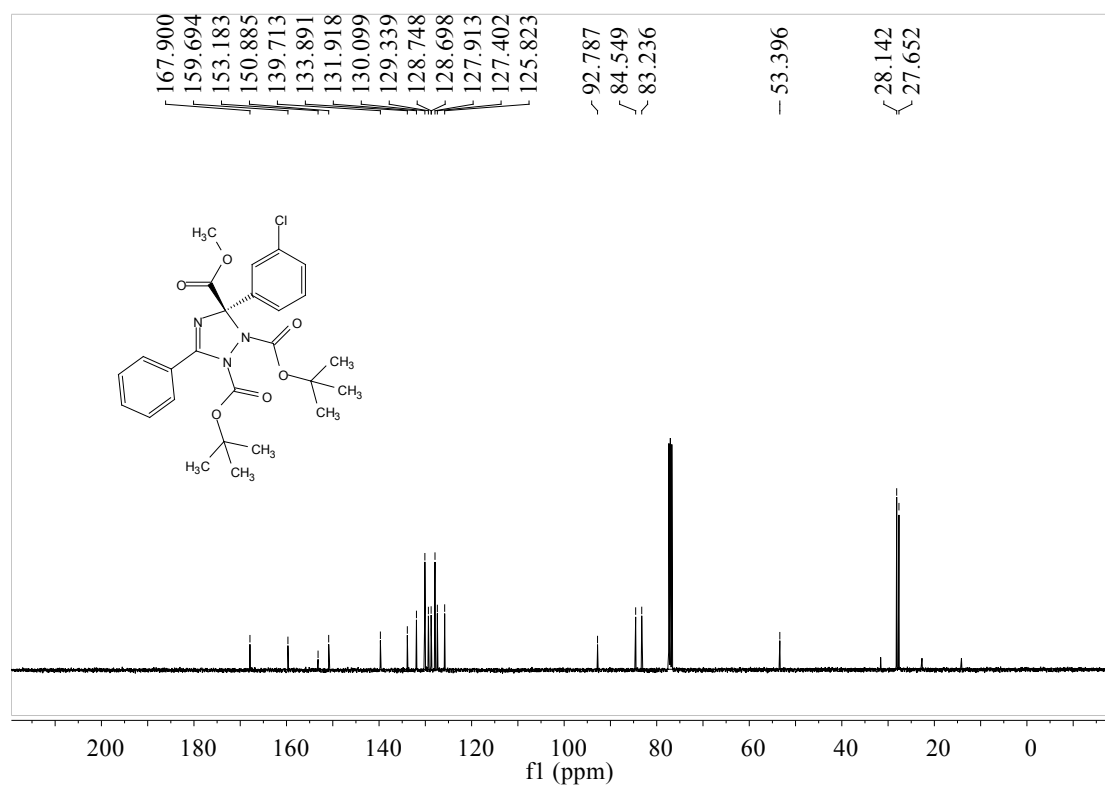



1,2-diethyl 3-methyl (R)-3-(2-chlorophenyl)-5-phenyl-1H-1,2,4-triazole-1,2,3(H)-tricarboxylate  
(3xa)

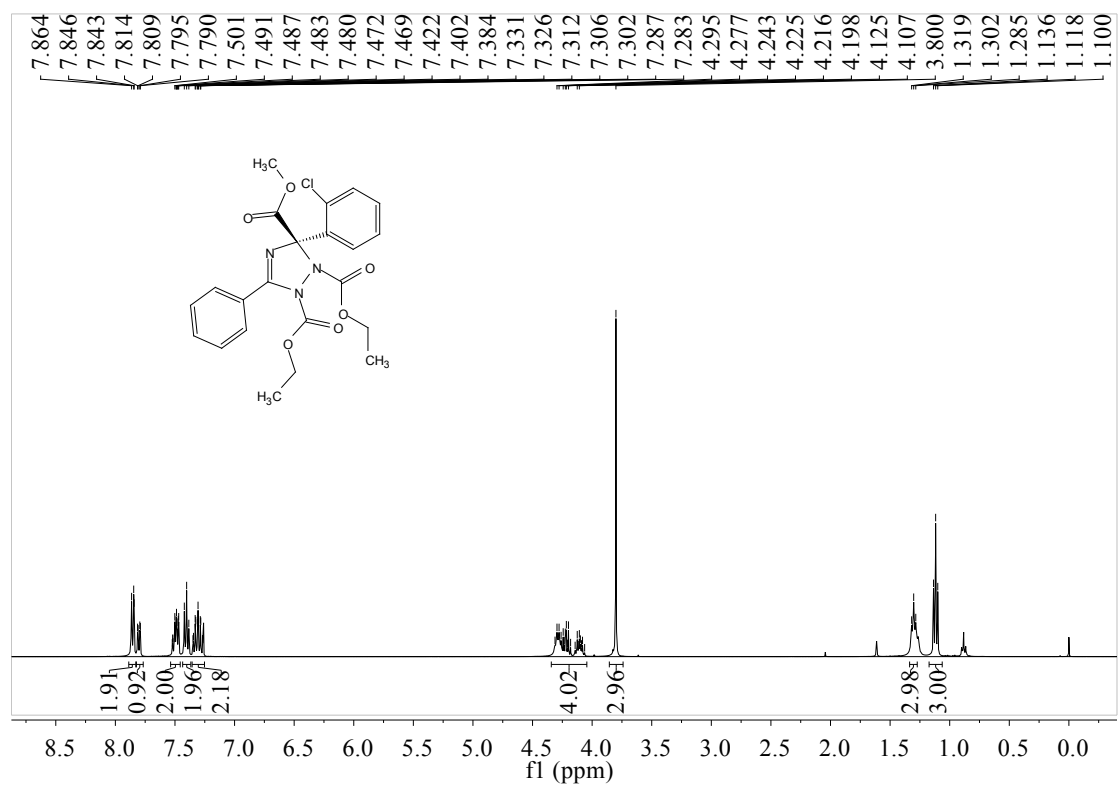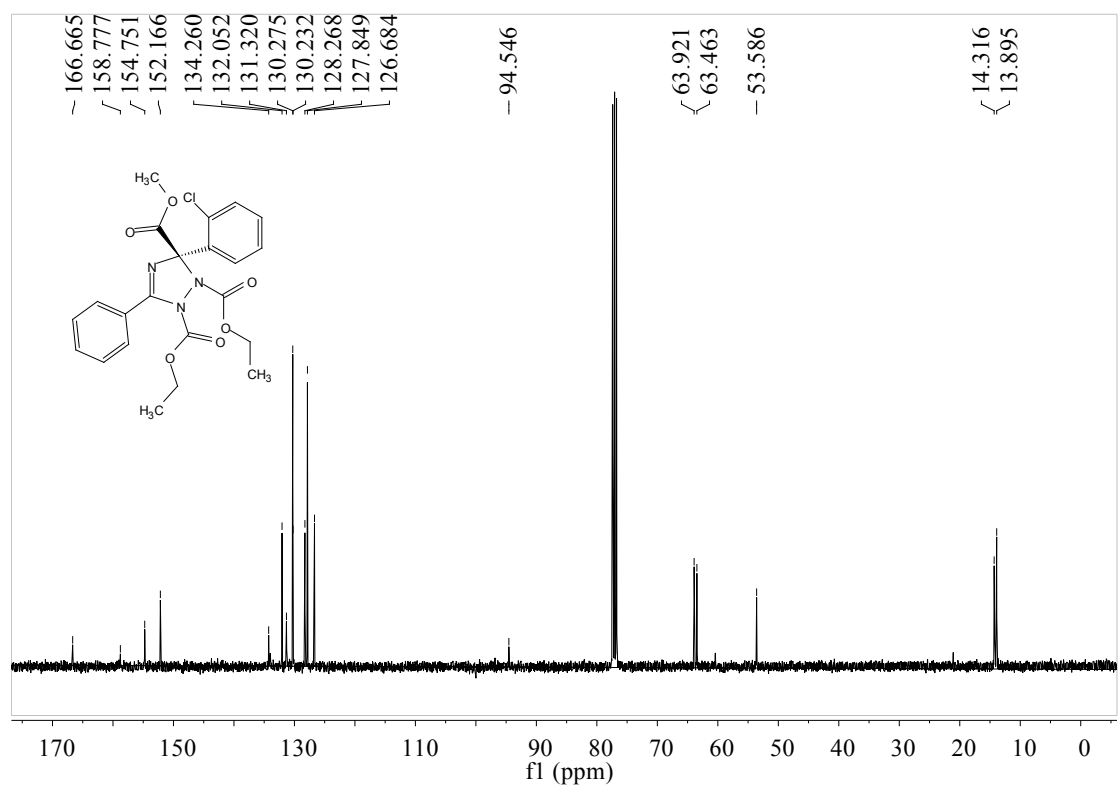

1,2-di-tert-butyl 3-ethyl (R)-5-(4-methoxyphenyl)-3-phenyl-1H-1,2,4-triazole-1,2,3(H)-tricarboxylate (**3yb**)

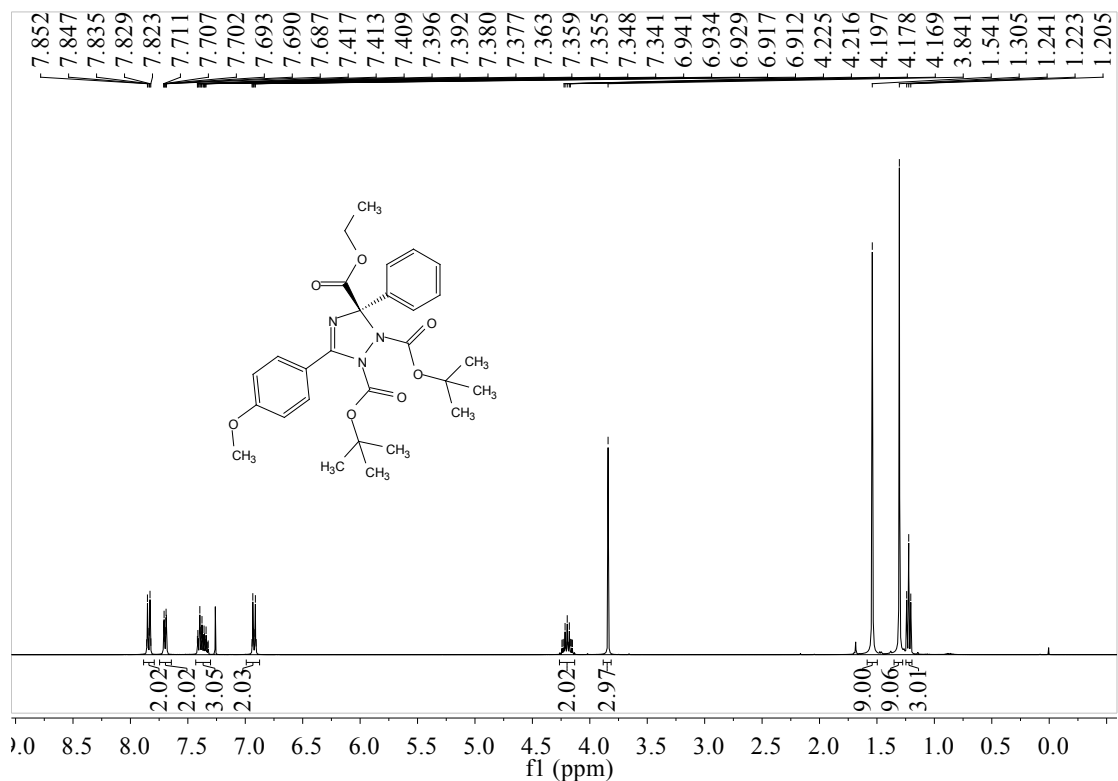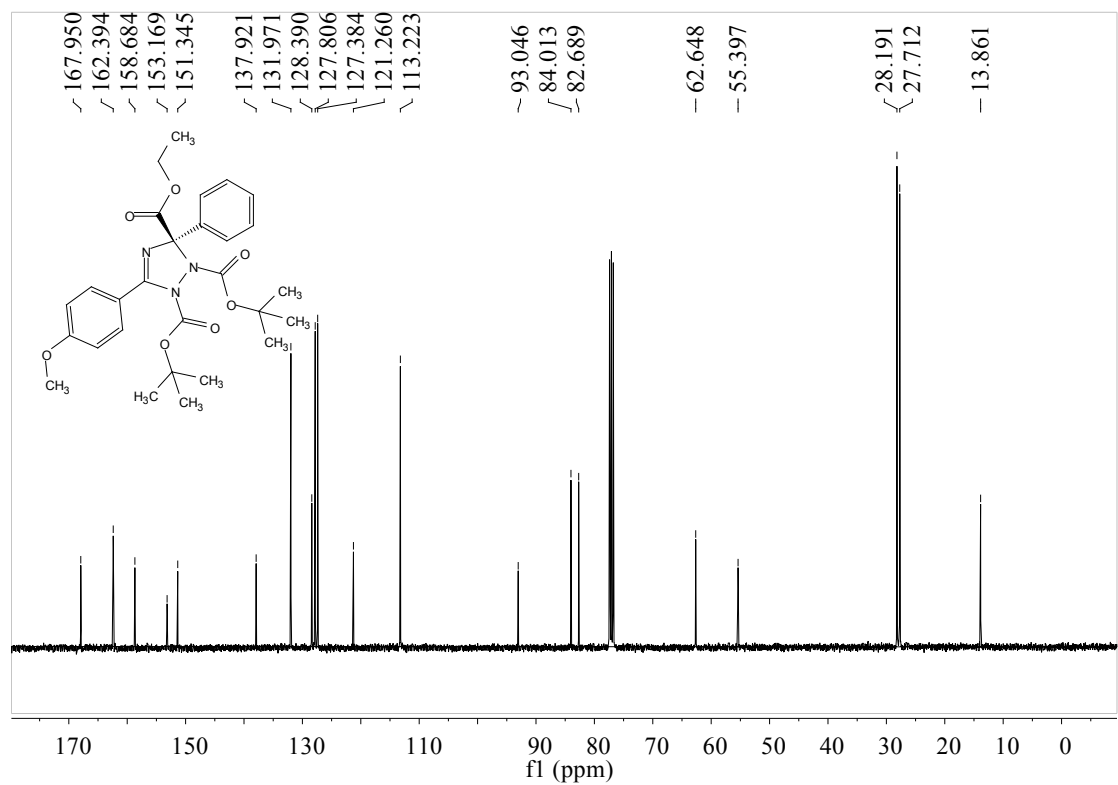

**(I) CD information of the products**

1,2-di-tert-butyl 3-methyl (R)-5-(4-methoxyphenyl)-3-phenyl-1H-1,2,4-triazole-1,2,3(3H)-tricarboxylate (**3ab**)

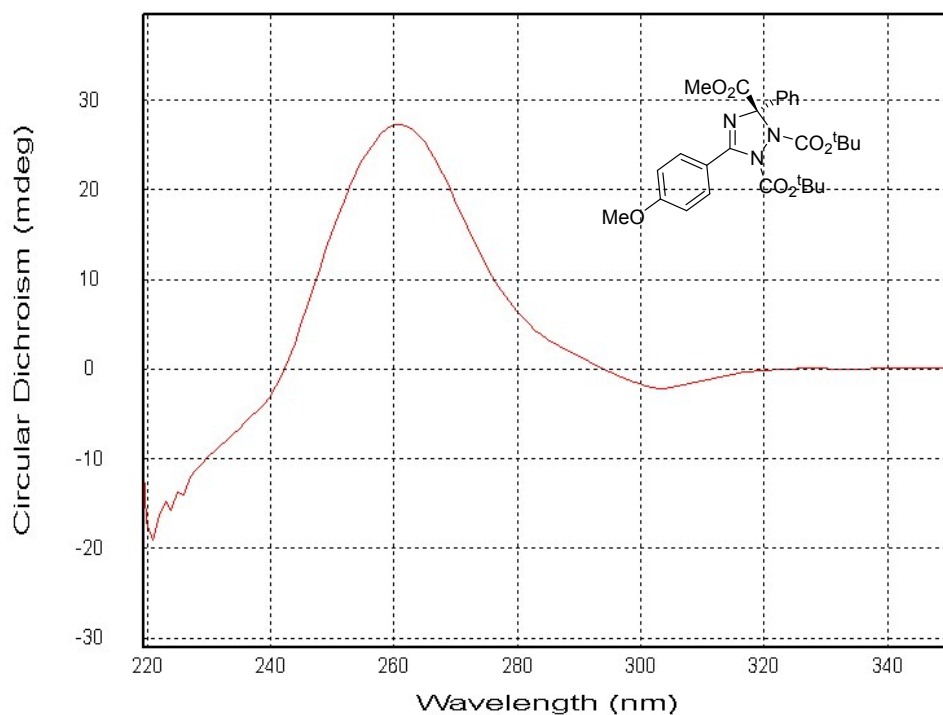

1,2-di-tert-butyl 3-methyl (R)-5-(3-methoxyphenyl)-3-phenyl-1H-1,2,4-triazole-1,2,3(3H)-tricarboxylate (**3bb**)

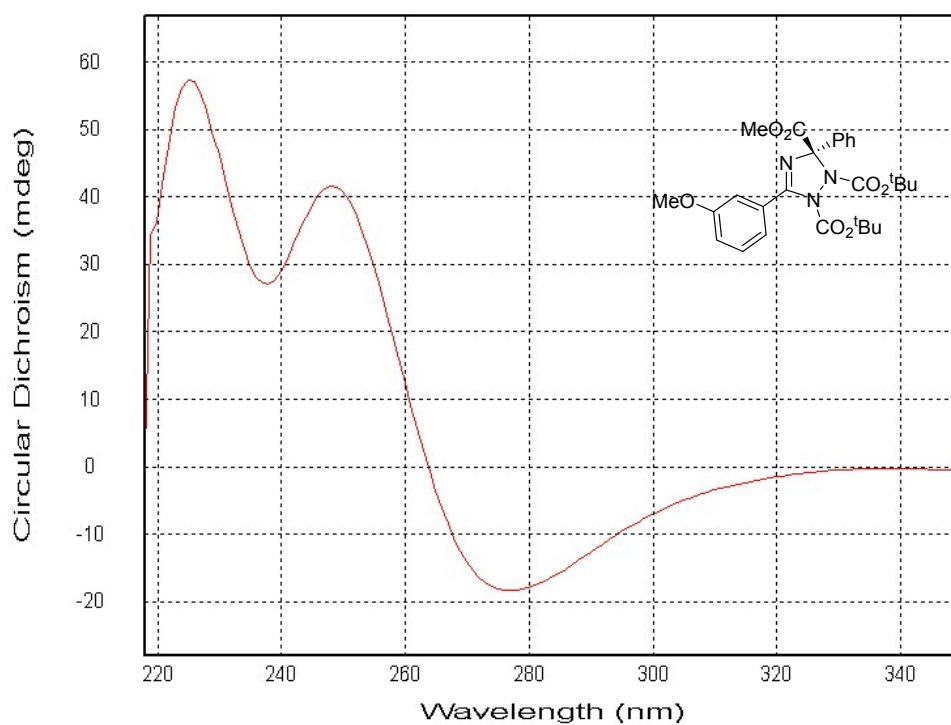

1,2-di-tert-butyl 3-methyl (R)-5-(4-ethoxyphenyl)-3-phenyl-1H-1,2,4-triazole-1,2,3(3H)-tricarboxylate (**3cb**)

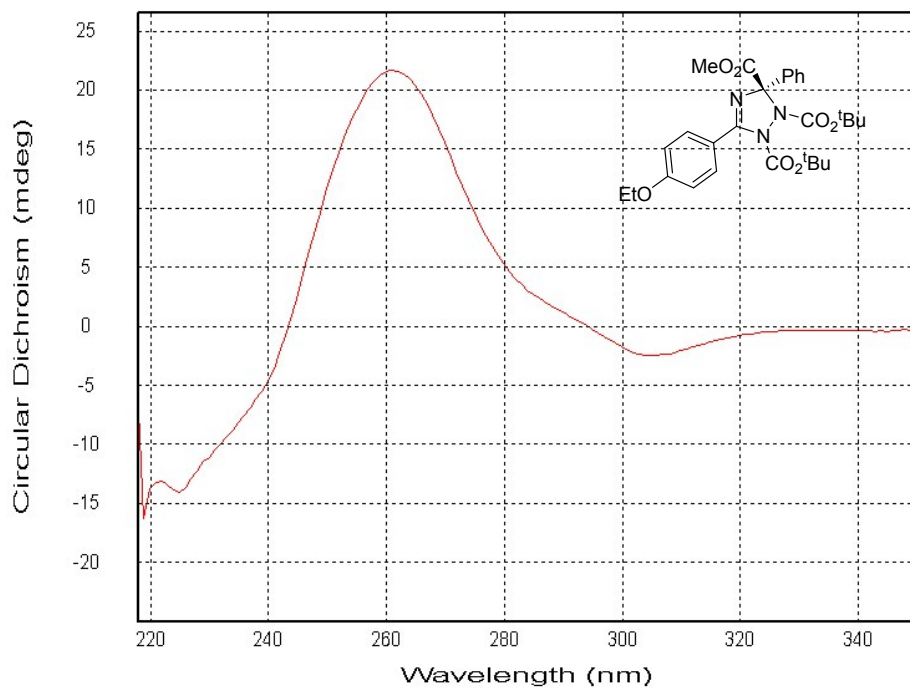

1,2-di-tert-butyl 3-methyl (R)-5-(4-(tert-butyl)phenyl)-3-phenyl-1H-1,2,4-triazole-1,2,3(3H)-tricarboxylate (**3db**)

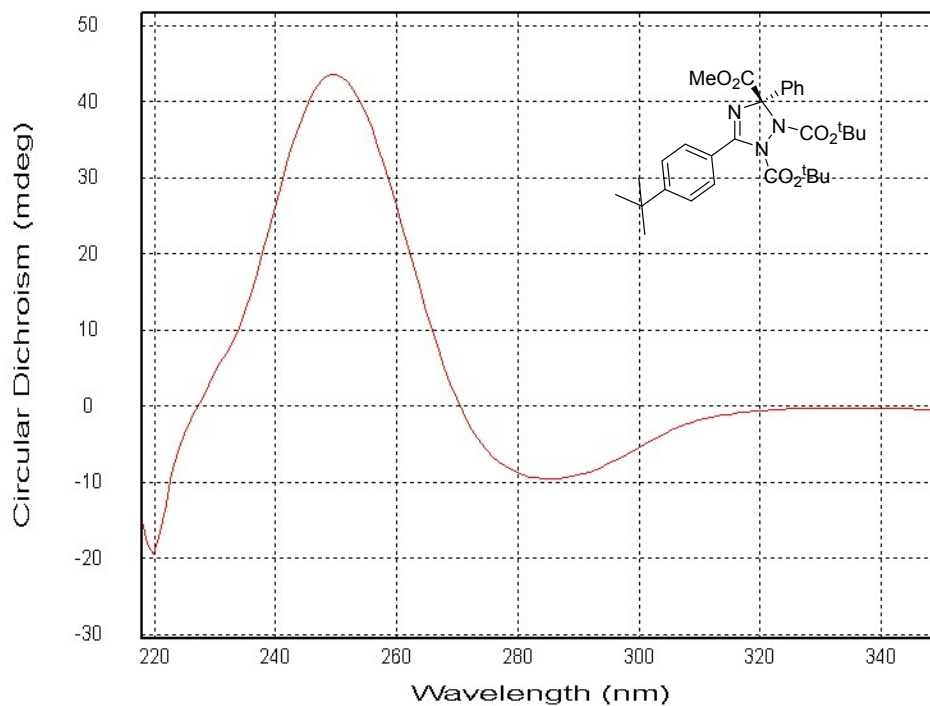

1,2-di-tert-butyl 3-methyl (R)-5-(3,5-dimethylphenyl)-3-phenyl-1H-1,2,4-triazole-1,2,3(3H)-tricarboxylate (**3eb**)

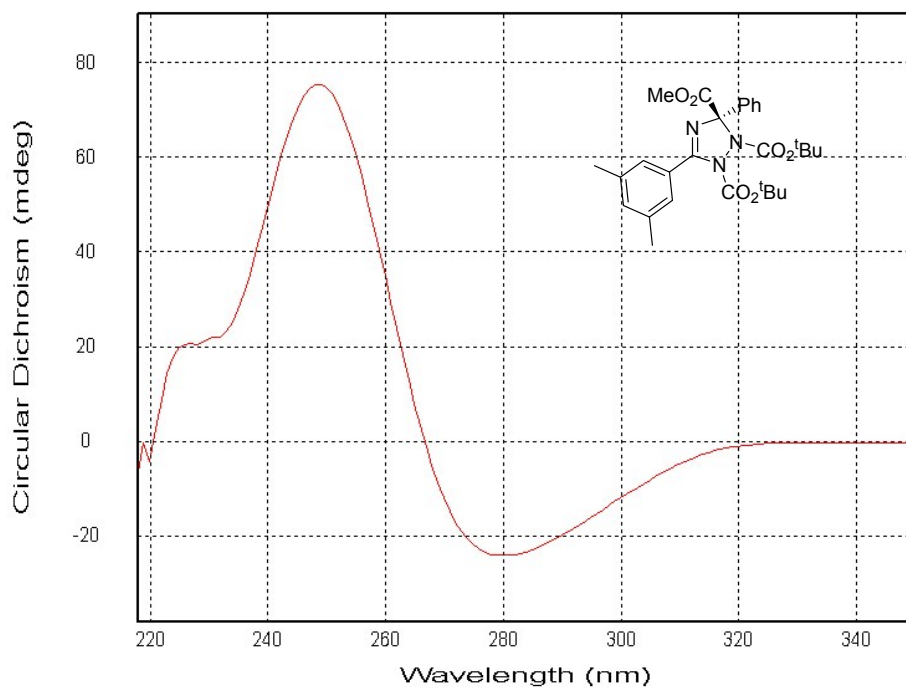

1,2-di-tert-butyl 3-methyl (R)-5-(4-bromophenyl)-3-phenyl-1H-1,2,4-triazole-1,2,3(3H)-tricarboxylate (**3fb**)

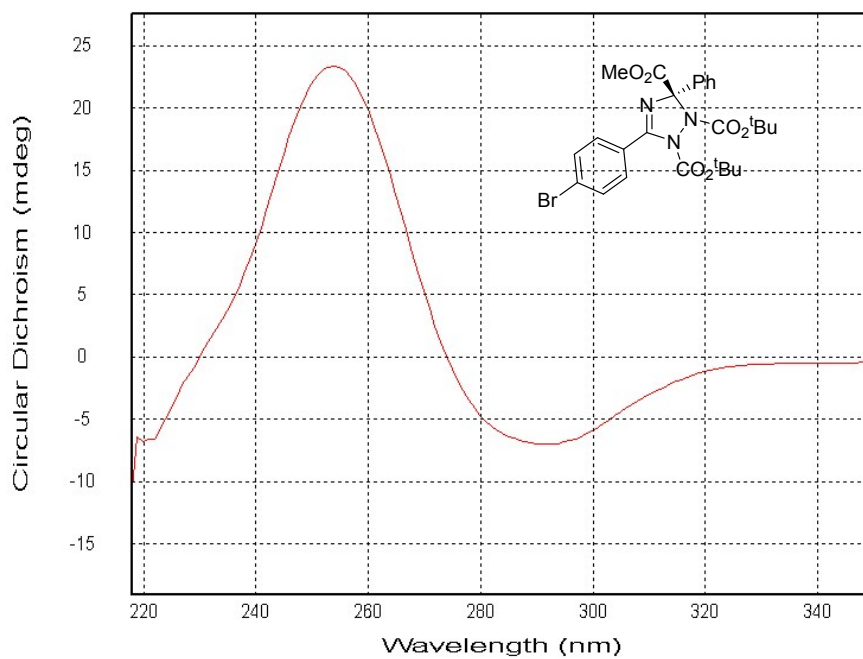

1,2-di-tert-butyl 3-methyl (R)-5-(4-fluorophenyl)-3-phenyl-1H-1,2,4-triazole-1,2,3(3H)-tricarboxylate (**3gb**)

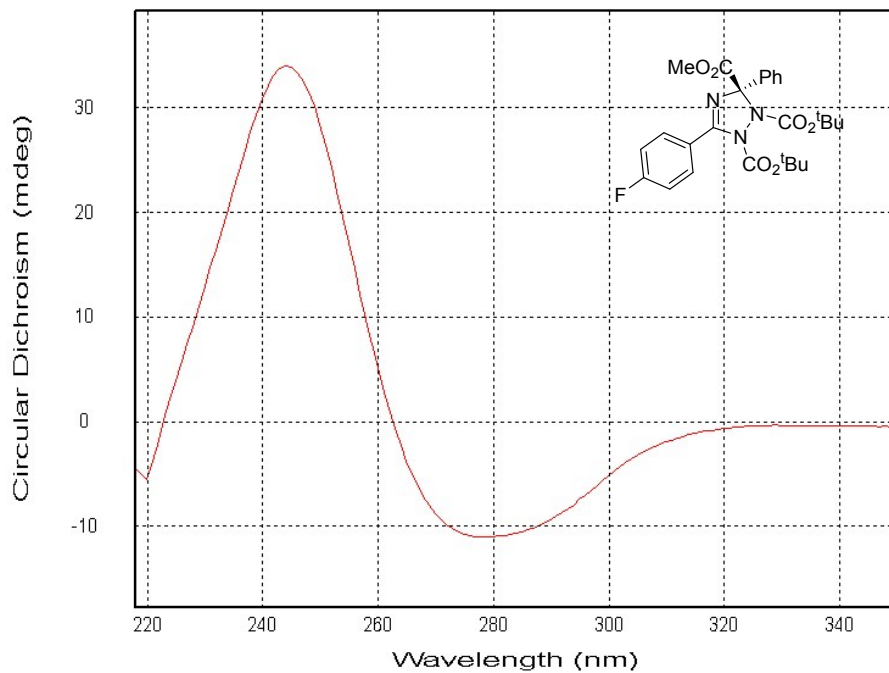

1,2-di-tert-butyl 3-methyl (R)-3,5-diphenyl-1H-1,2,4-triazole-1,2,3(3H)-tricarboxylate (**3hb**)

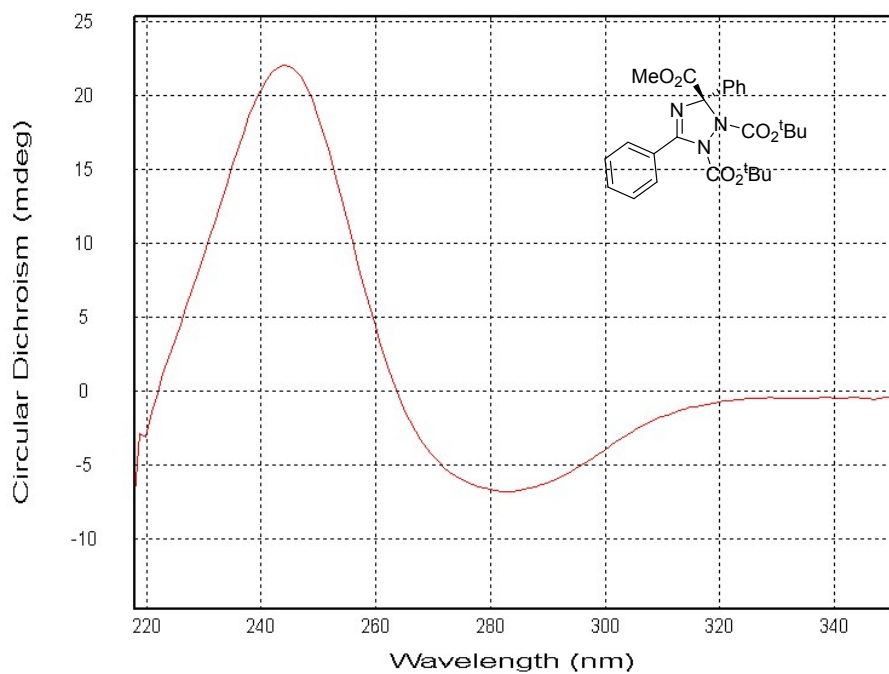

1,2-di-tert-butyl 3-methyl (R)-5-(naphthalen-2-yl)-3-phenyl-1H-1,2,4-triazole-1,2,3(3H)-tricarboxylate (**3ib**)

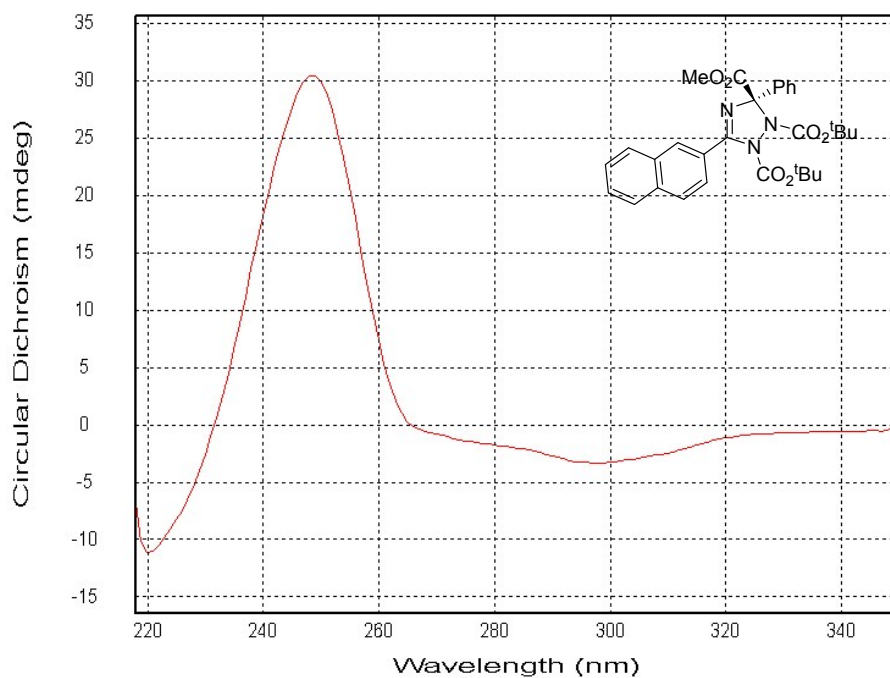

1,2-di-tert-butyl 3-methyl (R)-5-(furan-2-yl)-3-phenyl-1H-1,2,4-triazole-1,2,3(3H)-tricarboxylate (**3jb**)

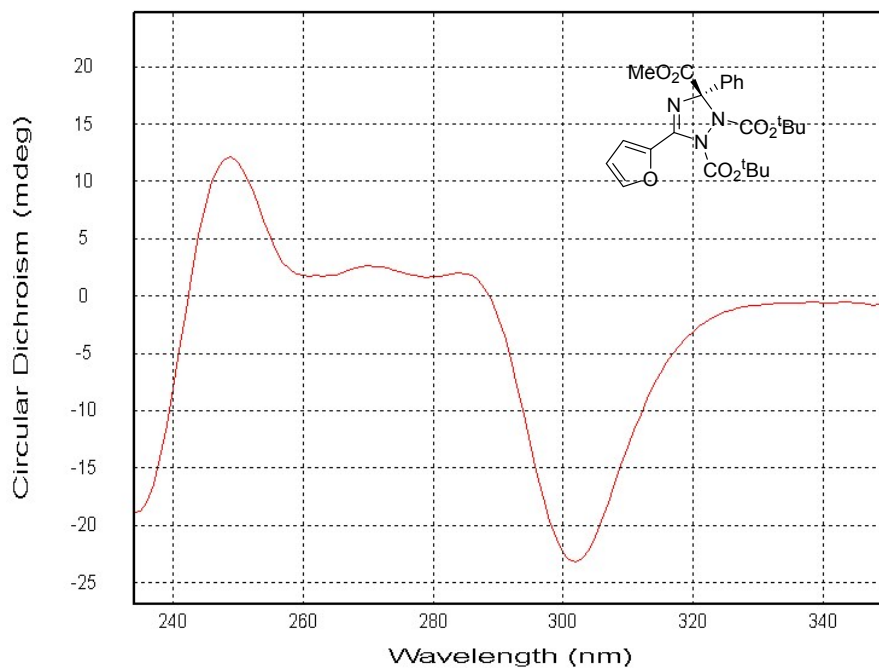

1,2-di-tert-butyl 3-methyl (R)-3-phenyl-5-(thiophen-2-yl)-1H-1,2,4-triazole-1,2,3(3H)-tricarboxylate (**3kb**)

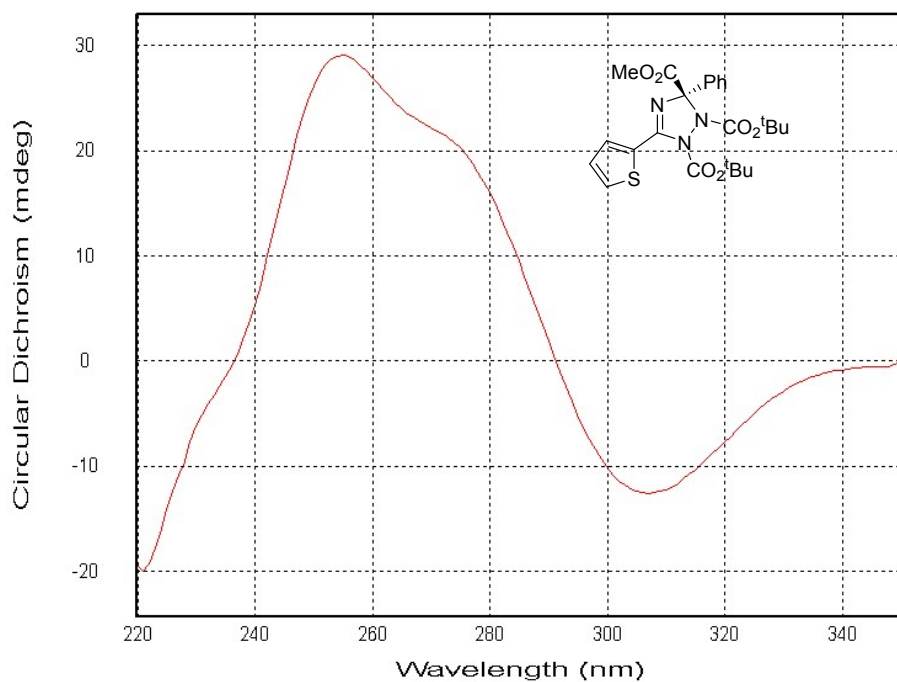

1,2-di-tert-butyl 3-methyl (R)-5-methyl-3-phenyl-1H-1,2,4-triazole-1,2,3(3H)-tricarboxylate (**3lb**)

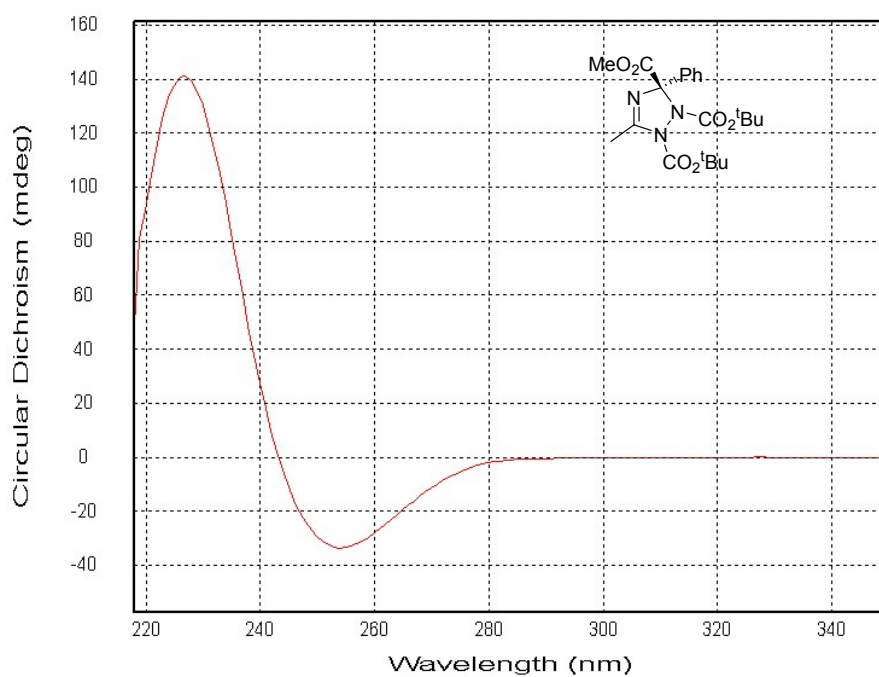



1,2-di-tert-butyl 3-methyl (R)-5-pentyl-3-phenyl-1H-1,2,4-triazole-1,2,3(3H)-tricarboxylate (**3mb**)

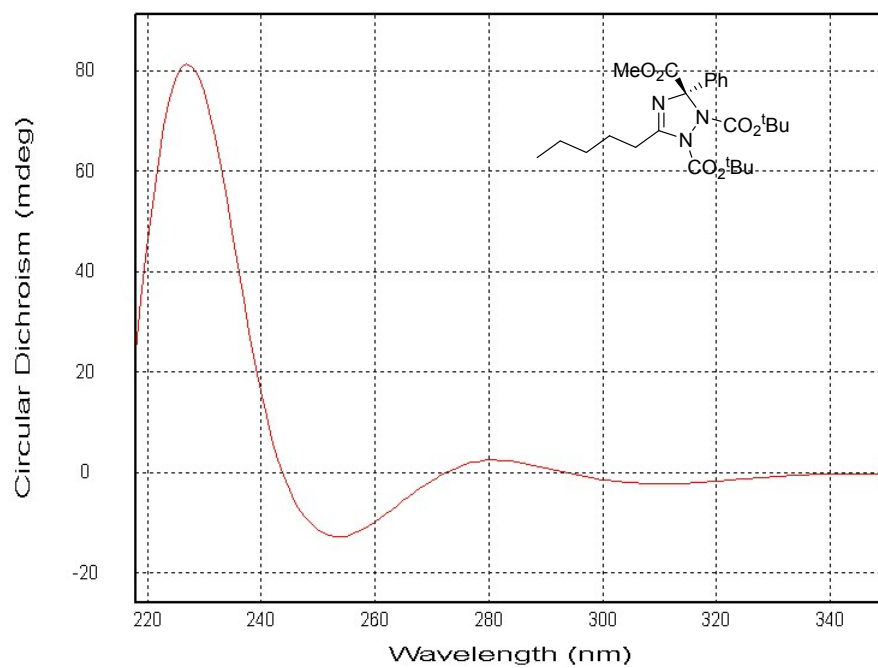

1,2-di-tert-butyl 3-methyl (R)-5-(4-methoxyphenyl)-1H-1,2,4-triazole-1,2,3(3H)-tricarboxylate (**3nb**)

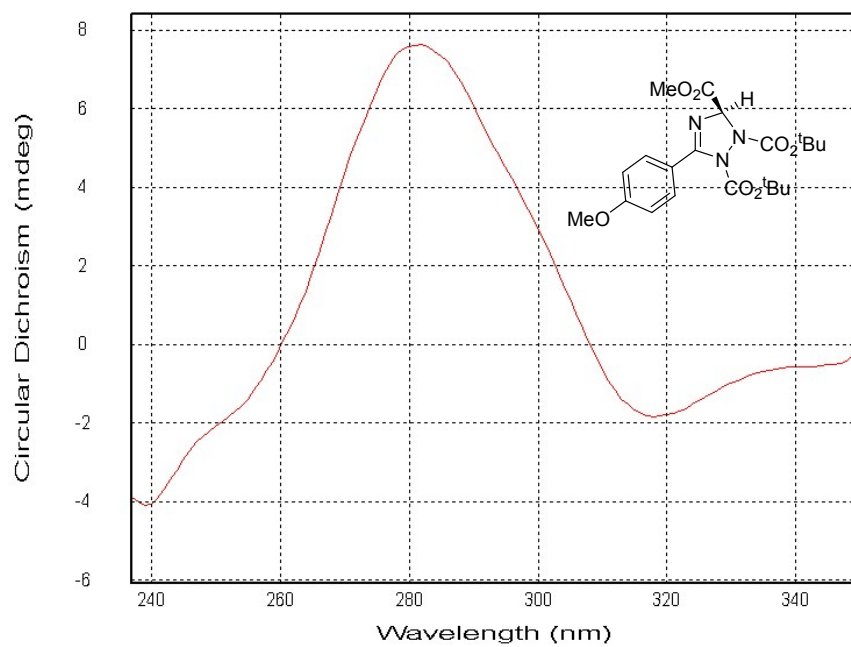

1,2-di-tert-butyl 3-methyl (R)-5-(4-methoxyphenyl)-3-methyl-1H-1,2,4-triazole-1,2,3(3H)-tricarboxylate (**3ob**)

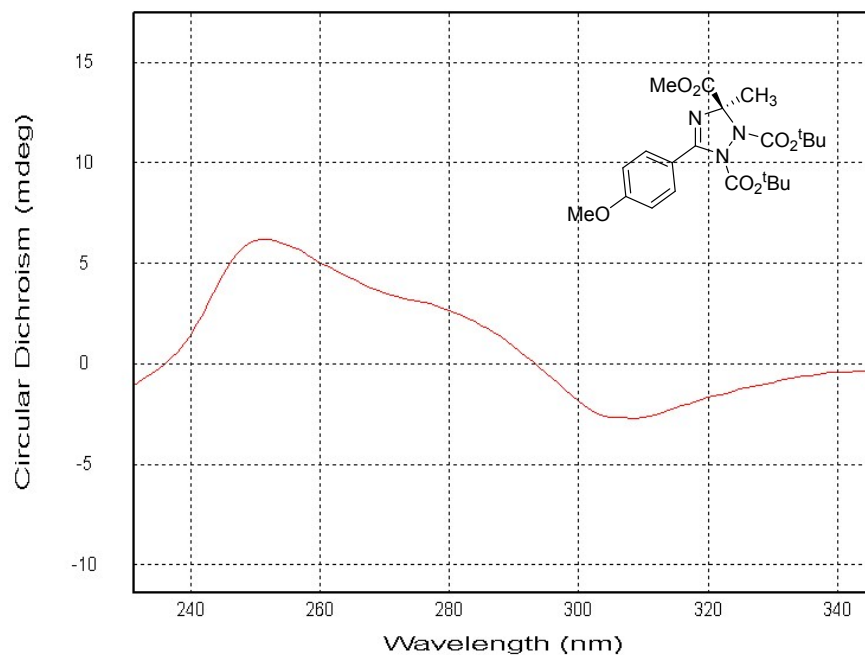

1,2-di-tert-butyl 3-methyl (R)-3-ethyl-5-(4-methoxyphenyl)-1H-1,2,4-triazole-1,2,3(3H)-tricarboxylate (**3pb**)

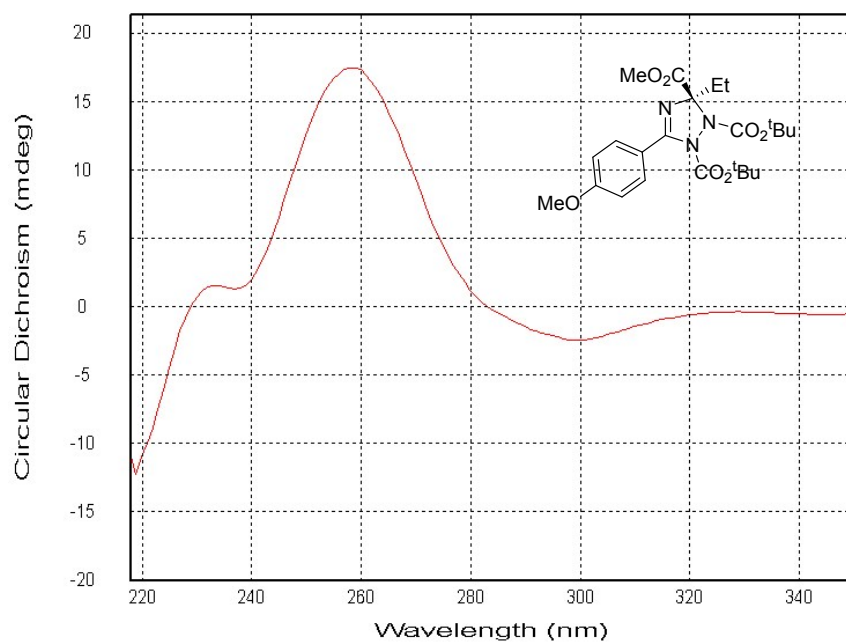

1,2-di-tert-butyl 3-methyl (R)-3-isopropyl-5-(4-methoxyphenyl)-1H-1,2,4-triazole-1,2,3(3H)-tricarboxylate (**3qb**)

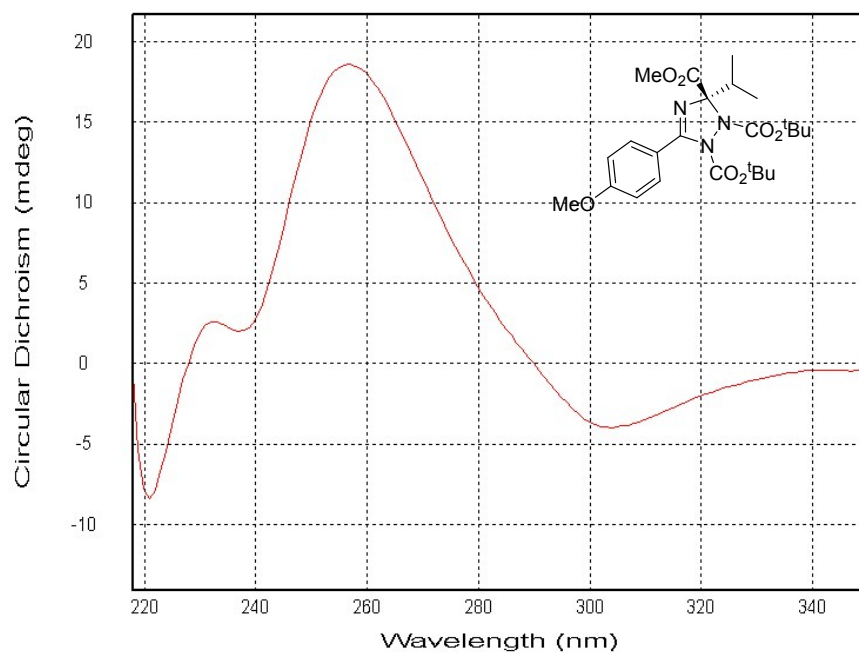

1,2-di-tert-butyl 3-methyl (R)-3-(4-fluorophenyl)-5-phenyl-1H-1,2,4-triazole-1,2,3(3H)-tricarboxylate (**3rb**)

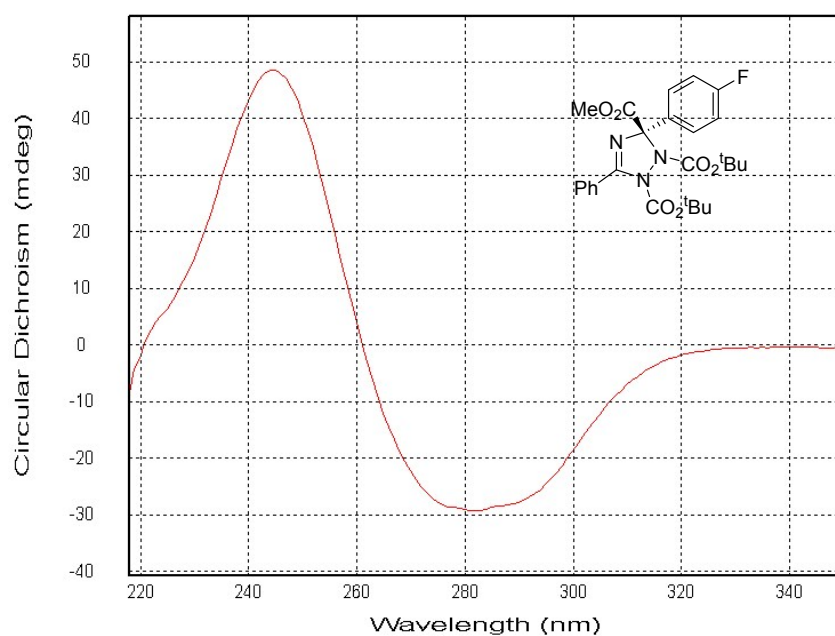

1,2-di-tert-butyl 3-methyl (R)-3-(4-bromophenyl)-5-phenyl-1H-1,2,4-triazole-1,2,3(3H)-tricarboxylate (**3sb**)

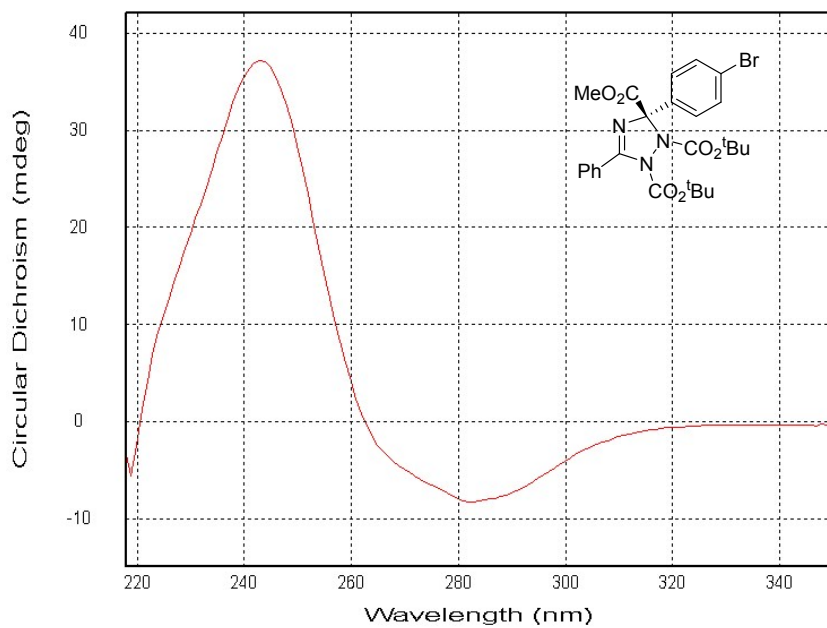

1,2-di-tert-butyl 3-methyl (R)-3-(4-chlorophenyl)-5-phenyl-1H-1,2,4-triazole-1,2,3(3H)-tricarboxylate (**3tb**)

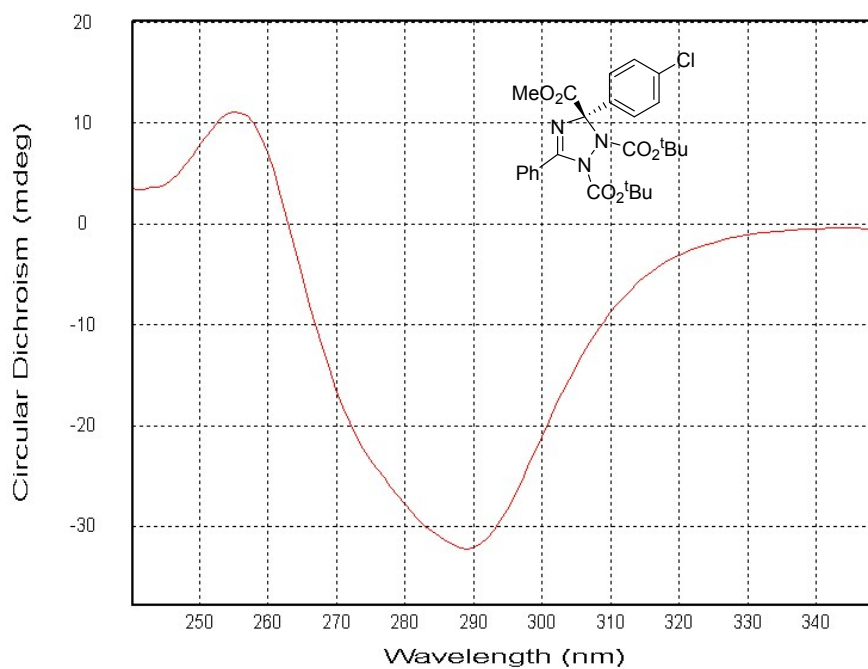

1,2-di-tert-butyl 3-methyl (R)-3-(4-methoxyphenyl)-5-phenyl-1H-1,2,4-triazole-1,2,3(3H)-tricarboxylate (**3ub**)

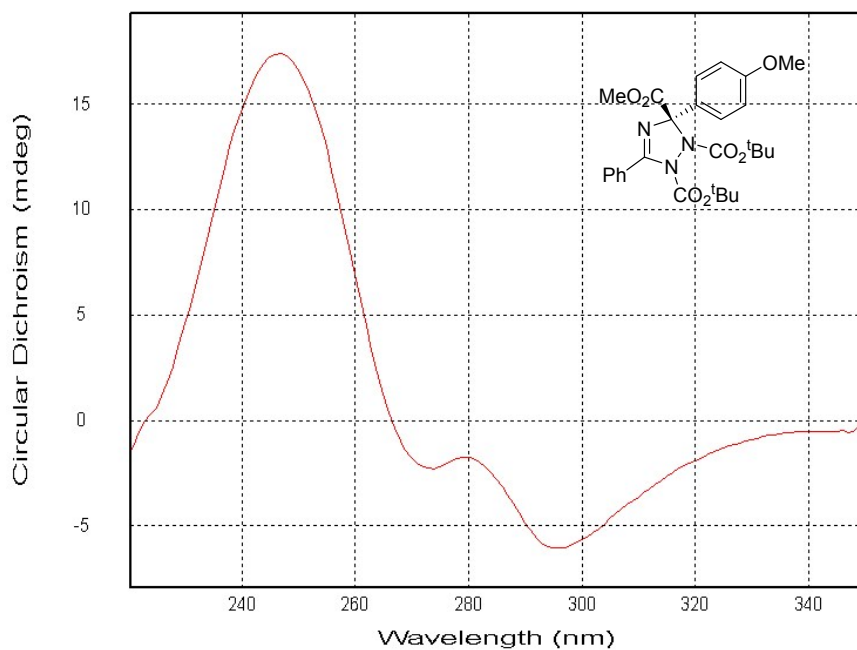

1,2-di-tert-butyl 3-methyl (R)-5-phenyl-3-(p-tolyl)-1H-1,2,4-triazole-1,2,3(3H)-tricarboxylate (**3vb**)

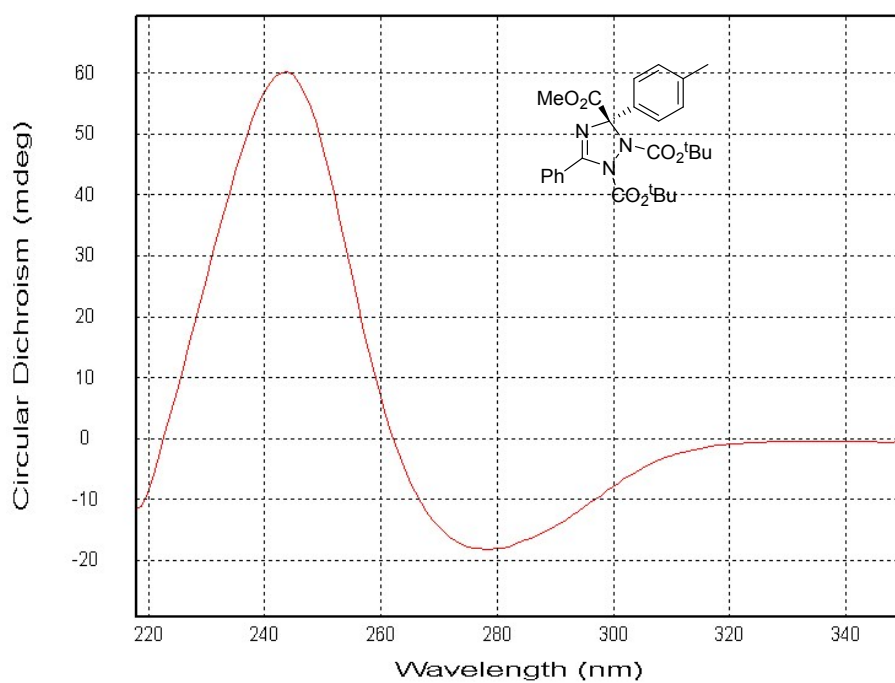

1,2-di-tert-butyl 3-methyl (R)-3-(3-chlorophenyl)-5-phenyl-1H-1,2,4-triazole-1,2,3(3H)-tricarboxylate (**3wb**)

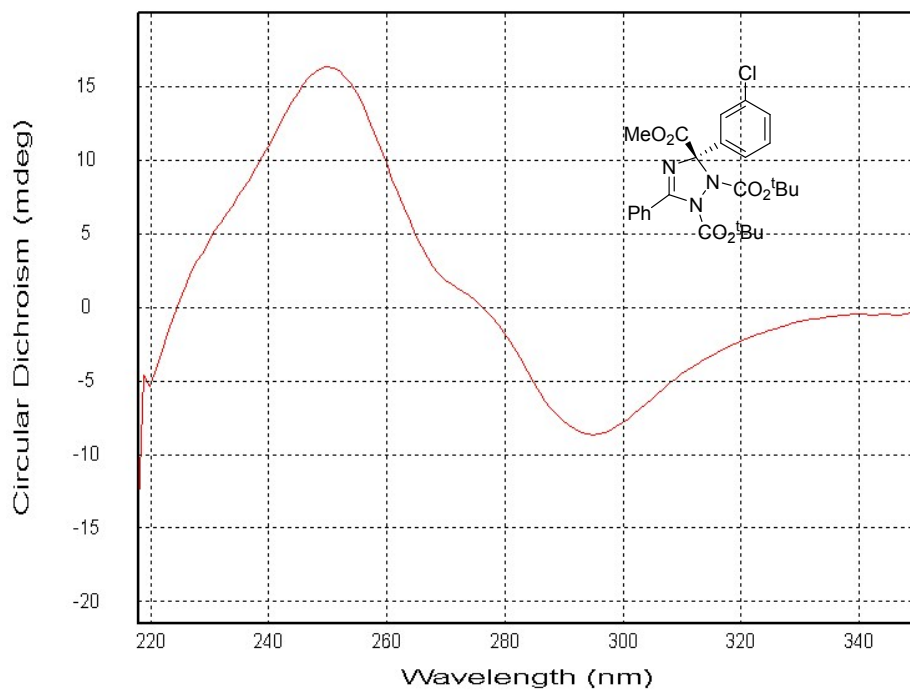

1,2-diethyl 3-methyl (R)-3-(2-chlorophenyl)-5-phenyl-1H-1,2,4-triazole-1,2,3(3H)-tricarboxylate (**3xa**)

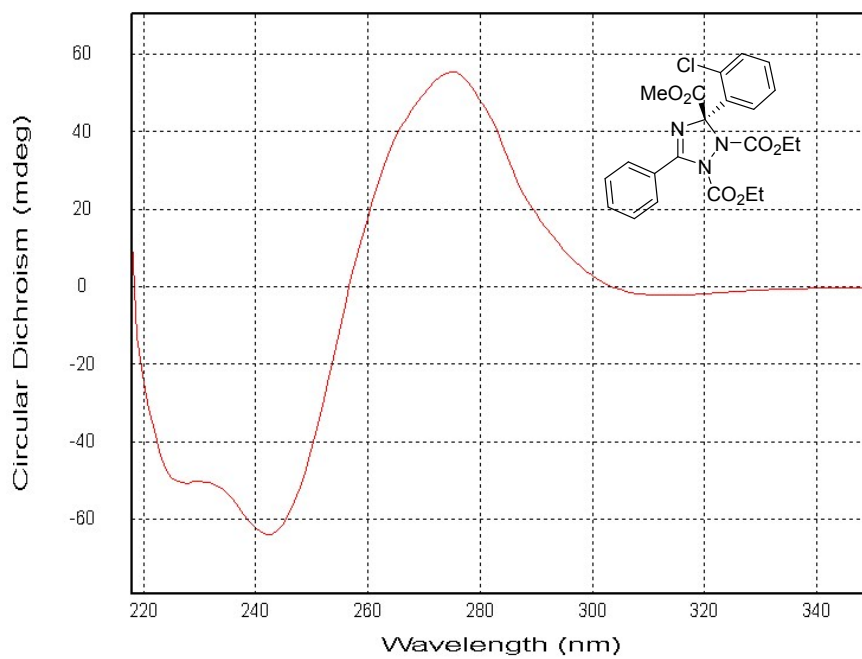

1,2-di-tert-butyl 3-ethyl (R)-5-(4-methoxyphenyl)-3-phenyl-1H-1,2,4-triazole-1,2,3(3H)-tricarboxylate (**3yb**)

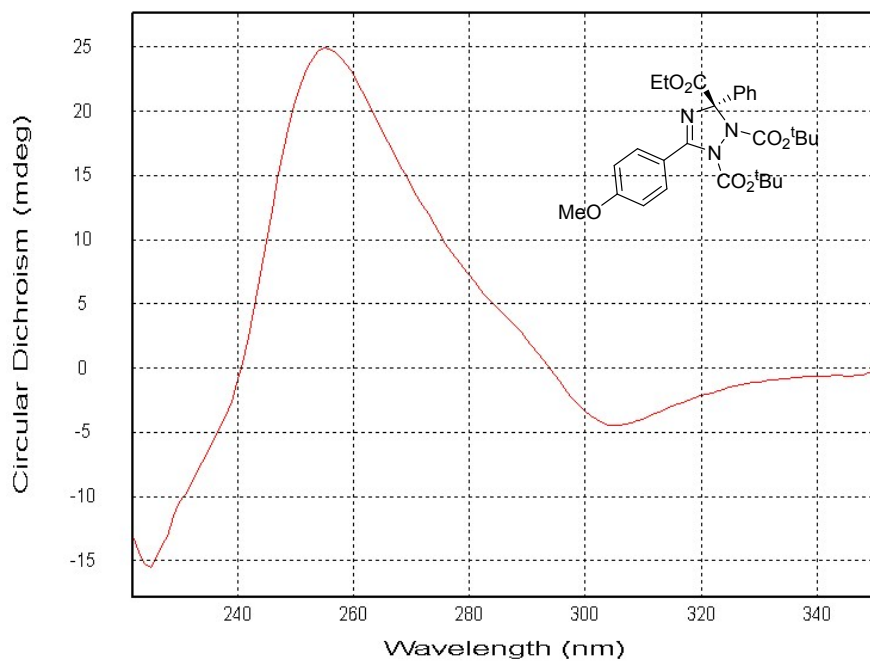

#### (J) References

- [1] Li, P. X.; Evans, C. D.; Wu, Y. Z.; Cao, B.; Hamel, E.; Joullière, M. M.; *J. Am. Chem. Soc.* **2008**, *130*, 2351–236.
